1        **Pentoxifylline-induced Protein Expression Change in**  
2                    **RAW 264.7 Cells as Determined by**  
3        **Immunoprecipitation-based High Performance Liquid**  
4                    **Chromatography**

5  
6        **Mi Hyun Seo<sup>1</sup>, Dae Won Kim<sup>2</sup>, Yeon Sook Kim<sup>3</sup>, Suk Keun Lee<sup>4\*</sup>**

7  
8        <sup>1</sup> Department of Oral and Maxillofacial Surgery, College of Dentistry, Seoul National University, Seoul,  
9        South Korea; [tjalgus@snu.ac.kr](mailto:tjalgus@snu.ac.kr)

10        <sup>2</sup> Department of Oral Biochemistry, College of Dentistry, Gangneung-Wonju National University,  
11        Gangneung, Korea; [kimdw@gwnu.ac.kr](mailto:kimdw@gwnu.ac.kr)

12        <sup>3</sup> Department of Dental Hygiene, College of Health & Medical Sciences, Cheongju University, Cheongju,  
13        South Korea; [yeonsookkim1@naver.com](mailto:yeonsookkim1@naver.com)

14        <sup>4</sup> Department of Oral Pathology, College of Dentistry, Gangneung-Wonju National University, Gangneung;  
15        and Institute of Hydrogen Magnetic Reaction Gene Regulation, Dae Jeon, South Korea;  
16        [sukkeunlee2@naver.com](mailto:sukkeunlee2@naver.com)  
17

18  
19  
20        \* Correspondence: ¶SKL: [sukkeunlee2@naver.com](mailto:sukkeunlee2@naver.com)

21

## 22 Abstract

23 Although pentoxifylline (PTX) was identified as a competitive non-selective phosphodiesterase inhibitor,  
24 its pharmacological effect has not been clearly elucidated. The present study explored the effect of low dose 10  
25  $\mu\text{g}/\text{mL}$  PTX (therapeutic dose) compared to high dose 300  $\mu\text{g}/\text{mL}$  PTX (experimental dose) in RAW 264.7  
26 cells through immunoprecipitation-based high performance liquid chromatography (IP-HPLC),  
27 immunohistochemistry, and western blot. 10  $\mu\text{g}/\text{mL}$  PTX increased the expression of proliferation (Ki-67,  
28 PCNA, cyclin D2, cdc25A), epigenetic modification (KDM4D, PCAF), protein translation (DOHH, DHPS,  
29 eIF5A1), RAS signaling (KRAS, pAKT1/2/3, PI3K), NF $\kappa$ B signaling (NF $\kappa$ B, GADD45, p38), protection  
30 (HSP70, SOD1, GSTO1/2), neuromuscular differentiation (NSE $\gamma$ , myosin-1a, desmin), osteoblastic  
31 differentiation (BMP2, RUNX2, osterix), acute inflammation (TNF $\alpha$ , IL-1, CXCR4), innate immunity  
32 ( $\beta$ -defensin 1, lactoferrin, TLR-3, -4), cell-mediated immunity (CD4, CD8, CD80), while decreased the  
33 expression of ER stress (eIF2 $\alpha$ , eIF2AK3, ATF6 $\alpha$ ), fibrosis (FGF2, CTGF, collagen 3A1), and chronic  
34 inflammation (CD68, MMP-2, -3, COX2) versus the untreated controls. The activation of proliferation by 10  
35  $\mu\text{g}/\text{mL}$  PTX was also supported by the increase of cMyc-MAX heterodimer and  $\beta$ -catenin-TCF1 complex in  
36 double IP-HPLC. 10  $\mu\text{g}/\text{mL}$  PTX enhanced FAS-mediated apoptosis but diminished p53-mediated apoptosis,  
37 and downregulated many angiogenesis proteins (angiogenin, VEGF-A, and FLT4), but upregulated HIF1 $\alpha$ ,  
38 VEGFR2, and CMG2 reactively. Whereas, 300  $\mu\text{g}/\text{mL}$  PTX consistently decreased proliferation, epigenetic  
39 modification, RAS and NF $\kappa$ B signaling, neuromuscular and osteoblastic differentiation, but increased  
40 apoptosis, ER stress, and fibrosis compared to 10  $\mu\text{g}/\text{mL}$  PTX. These data suggest PTX has different  
41 biological effect on RWA 264.7 cells depending on the concentration of 10  $\mu\text{g}/\text{mL}$  and 300  $\mu\text{g}/\text{mL}$  PTX. The  
42 low dose 10  $\mu\text{g}/\text{mL}$  PTX enhanced RAS/NF $\kappa$ B signaling, proliferation, differentiation, and inflammation,  
43 particularly, it stimulated neuromuscular and osteoblastic differentiation, innate immunity, and cell-mediated

44 immunity, but attenuated ER stress, fibrosis, angiogenesis, and chronic inflammation, while the high dose 300  
45 µg/mL PTX was found to alleviate the 10 µg/mL PTX-induced biological effects, resulted in the suppression  
46 of RAS/NFκB signaling, proliferation, neuromuscular and osteoblastic differentiation, and inflammation.

47

48 **Keywords:** 10 µg/mL or 300 µg/mL Pentoxifylline; Protein Expressions; IP-HPLC; RAW 264.7 Cells

49

## 50 **Introduction**

51 Pentoxifylline (PTX), a xanthine derivative, is primarily used as an antiproteolytic agent to treat muscle  
52 pain in people with peripheral artery disease [1, 2] by activating cAMP/EPAC/AKT signaling [3, 4]. It has been  
53 frequently reported that PTX remarkably suppressed the secretions of pro-inflammatory cytokines and the  
54 nuclear factor-kappaB (NFκB) activation [5-7], and reduced chronic inflammation [5, 8]. PTX appeared to have  
55 anti-fibrotic effect on radiation-induced lung fibrosis by modulation of PKA and PAI-1 expression as possible  
56 anti-fibrotic mechanisms [9], and PTX therapy with vitamin E showed prevention of radiation-induced fibrosis  
57 in breast cancer patients [10]. PTX is suggested as an oral osteogenic drug for the treatment of post-menopausal  
58 osteoporosis [11]. As PTX given before tooth extraction is prophylactic, it might affect healing in a positive  
59 way by optimizing the inflammatory response [12]. Many authors suggest that PTX may increase the anticancer  
60 potential of anticancer drugs such as cisplatin or doxorubicin as well as reduce side effects of these drugs  
61 [13-16].

62 As RAW 264.7 cells are immortalized macrophages which are mainly involved with wound healing and  
63 tumor progression, the present study utilized RAW 264.7 cells for *in vitro* protein expression experiment.

64 Although PTX has short half-life (0.39–0.84 h for the various doses and 0.96–1.61 h for the metabolites), its  
65 therapeutic dose for adult human is usually 400 mg (Trental), three times a day [17, 18]. Therefore, in this  
66 study, RAW 264.7 cells were primarily treated with 10 µg/mL PTX, which is similar to human therapeutic  
67 dose (6.7 mg/kg, Trental). However, in the pilot study to know the trends of protein expressions by PTX, 10  
68 µg/mL PTX increased the expression of some proliferation-related proteins, RAS and NFκB signaling  
69 proteins, and even some inflammatory proteins in RAW 264.7 cells. These results were contrary to many  
70 reports insisting the anti-proliferative and anti-inflammatory effect of PTX. However, it was found that many  
71 experiments for PTX-induced effects on cells and animals were frequently performed by using higher dose of  
72 PTX, 100 – 500 µg/mL [5, 8, 19-22], than therapeutic dose of PTX, about 10 µg/mL. In order to elucidate the  
73 different pharmacological effect depending on the dose of PTX, the present study was performed to compare  
74 10 µg/mL PTX-induced protein expressions with 300 µg/mL PTX-induced protein expression in RAW 264.7  
75 cells.

76 As the essential protein signalings are intimately correlated and cross-talked with each other to maintain  
77 cellular homeostasis during proliferation, differentiation, inflammation, apoptosis, and senescence, it is  
78 necessary to know the global protein expression involving multiple signaling pathways in order to explain or  
79 predict the fate of cells involved with diseases or drug therapy. The present study examined PTX-induced  
80 global protein expression changes in RAW 264.7 cells through IP-HPLC, immunocytochemistry (ICC), and  
81 western blot. Particularly, IP-HPLC analysis is available to determine protein expression levels in different  
82 biological fluids, such as blood plasma, urine, saliva [23, 24], inflammatory exudates [25-27], cancer tissues  
83 [28, 29], cell culture extract [30-34], and blood plasma [32, 35]. Contrary to enzyme-linked immunosorbent  
84 assay (ELISA). IP-HPLC uses protein A/G agarose beads in chaotic buffer solution and micro-sensitive UV  
85 spectroscopy to determine protein expression level (%) compared to the control. It can rapidly analyze multiple



86 proteins samples. Furthermore, multiple repeats of same protein IP-HPLC showed accurate results ( $\pm 5\%$   
87 standard deviation) reproducibly [33, 34]. Therefore, 10  $\mu\text{g}/\text{mL}$  PTX-induced global protein expression  
88 changes in RAW 264.7 cells were extensively examined through IP-HPLC partly with immunocytochemistry  
89 (ICC) and western blot methods in this study.

90

91

## 92 **Materials and Methods**

### 93 **RAW 264.7 cell culture in the presence of PTX**

94 RAW 264.7 cells (an immortalized murine macrophage cell line; ATCC, USA) were cultured in  
95 Dulbecco's modified Eagle's medium (WelGene Inc. Korea) supplemented with 10% (vol/vol) heat-inactivated  
96 fetal bovine serum (WelGene Inc. Korea), 100 unit/mL penicillin, 100 $\mu\text{g}/\text{mL}$  streptomycin, and 250ng/mL  
97 amphotericin B (WelGene Inc. Korea), in 5%  $\text{CO}_2$  chamber at 37.5°C. The cells from passage no. 10-12 were  
98 used in this study [36]. Antigen free media was utilized in order to detect native protein expressional changes  
99 induced by PTX.

100 About 70% confluent RAW 264.7 cells grown on Petri dish surfaces were treated with 10  $\mu\text{g}/\text{mL}$  PTX or  
101 300  $\mu\text{g}/\text{mL}$  PTX (safe single dose in dogs 100-300 mg/kg according to WHO food additives Series 35, 835)  
102 for 12, 24, or 48 h; control cells were treated with 1 mL of normal saline. Cultured cells were harvested with  
103 protein lysis buffer (PRO-PREP™, iNtRON Biotechnology INC, Korea) cooled on ice, and immediately  
104 preserved at -70°C until required.

105

### 106 **Cytological cell counting for the proliferation index**

107 RAW 264.7 cells were cultured on the surfaces of two-well culture slide dishes (SPL, Korea) until they  
108 reached 50% confluence, and then treated with 10  $\mu\text{g}/\text{mL}$  PTX for 12, 24, or 48 h. The control was treated with

109 normal saline only. The cells on the culture slides were fixed with 10 % buffered formalin solution for 1 hour,  
110 stained with hematoxylin, and observed by optical microscope (CX43, Olympus, Japan) at x400 magnification.  
111 Thirty representative images were digitally captured in each group (DP-73, Olympus Co., Japan), followed by a  
112 cell counting using the IMT i-solution program (version 21.1; Martin Microscope, Vancouver, Canada). The  
113 results were plotted on a graph.

114

## 115 **Immunocytochemical staining analysis**

116 When approximately 70% confluent RAW 264.7 cells were spread over the surfaces of two-well culture  
117 slide dishes, the cells were treated with 10 µg/mL PTX for 12, 24, or 48 h, while the control cells were treated  
118 with 100 µL of normal saline. The cells on the culture slides were fixed with 4% paraformaldehyde solution for  
119 20 min, permeabilized with cooled methanol for 10 min at -20°C, and applied for immunohistochemistry using  
120 selected antisera (the same ones used in IP-HPLC, Table 1); Ki-67 for cellular proliferation, KMD4D and  
121 PCAF for epigenetic modification, TNF $\alpha$ , IL-6, TLR3, and TLR4 for inflammation, GSTO1/2, LC3, and  
122 GADD153 (CHOP) for endoplasmic reticulum stress, PARP-1 and caspase 3 for apoptosis, NSE $\gamma$  for neural  
123 differentiation, MYH2 for muscular differentiation, TGF- $\beta$ 1, RUNX2, OPG, and BMP2 for osteoblastic  
124 differentiation.

125 Immunocytochemical (ICC) staining was performed using the indirect triple sandwich method on the  
126 Vectastain system (Vector Laboratories, USA), and visualized using a 3-amino-9-ethylcarbazole solution  
127 (Santa Cruz Biotechnology, USA) with no counter staining. The results were observed by optical microscope,  
128 and their characteristic images were captured (DP-73, Olympus Co., Japan) and illustrated.

129

## 130 **Western blot analysis**

131 Some representative antisera were utilized for western blot analysis to assess the 10 µg/mL or 300 µg/mL  
132 PTX-induced protein expression in RAW 264.7 cells. Ki-67 was selected for cellular proliferation, p53, Rb1,  
133 and E2F1 for p53/Rb/E2F signaling,  $\beta$ -catenin, E-cadherin, VE-cadherin, Wnt1, and TCF1 for Wnt/ $\beta$ -catenin  
134 signaling, cMyc, MAX, and MAD1 for cMyc/MAX/MAD network, KDM4D and HDAC10 for epigenetic  
135 modification, KRAS, HRAS, NRAS, ERK1, and p-ERK1 for RAS signaling, TNF $\alpha$ , TLR2, and TLR4 for  
136 inflammation, eIF2AK3, p-eIF2AK3, ATF4, LC3 $\beta$ , and c-caspase 3 for endoplasmic reticulum stress, TGF- $\beta$ 1,

137 BMP2, RUNX2 for osteogenesis, NSE $\gamma$  and NF1 for neural differentiation, and MYH2 and desmin for  
138 muscular differentiation. These antisera were the same ones used in IP-HPLC (Table 1).

139 The cells treated with 10  $\mu\text{g}/\text{mL}$  and 300  $\mu\text{g}/\text{mL}$  PTX for 0, 12, 24, and 48 h were collected with  
140 phosphate-buffered saline (PBS) separately, treated with trypsin-ethylene-diamine-tetra-acetic acid  
141 (trypsin-EDTA) for one minute, and washed with PBS, and followed by cell lysis with ice-cold RIPA buffer  
142 (Sigma Aldrich, USA). The lysates were centrifuged at 12,000 g for 20 min at 4° C. The protein concentration  
143 of the supernatant was quantified using a Bradford assay (BioRad, USA). Equal amounts (30  $\mu\text{g}/\text{lane}$ ) of the  
144 sample proteins were separated by 8, 10, 15, or 20% sodium dodecyl sulfate-polyacrylamide gel electrophoresis  
145 (SDS-PAGE) in Tris-glycine SDS running buffer (25 mM Tris, 0.1% SDS, and 0.2M glycine), and transferred  
146 to a nitrocellulose membrane. The membranes were blocked with 5% nonfat dry milk in TBST buffer (25 mM  
147 Tris-HCl, 150 mM NaCl, 0.1% Tween 20, pH 7.5) for 1 h. After washing three times with TBST buffer, the  
148 membrane was incubated with each primary antibody (dilution ratio = 1:1000, the same antibody used in  
149 IP-HPLC) and horseradish peroxidase-conjugated secondary antibody for 1 h separately. The protein bands  
150 were then detected using an enhanced chemiluminescence system (Amersham Pharmacia Biotech, Piscataway,  
151 NJ, USA) and digitally imaged using a ChemiDoc XRS system (Bio-Rad Laboratories, Hercules, CA, USA).  
152 The level of  $\beta$ -actin expression was used as an internal control to normalize the expression of the target proteins.  
153 The size and intensity of protein bands from the cells treated with 10  $\mu\text{g}/\text{mL}$  PTX for 0, 12, 24, and 48 h were  
154 demonstrated, and the protein bands from 10  $\mu\text{g}/\text{mL}$  PTX-treated cells were compared with those from 300  
155  $\mu\text{g}/\text{mL}$  PTX-treated cells.

156

157 **Immunoprecipitation-based high performance liquid chromatography**  
158 **(IP-HPLC)**

159 Protein A/G agarose columns were separately pre-incubated with each 1 µg antibody for  
160 proliferation-related proteins (n=13), cMyc/MAX/MAD network proteins (n=6(3)), p53/Rb/E2F signaling  
161 proteins (n=7(3)), Wnt/β-catenin signaling proteins (n=9), epigenetic modification proteins (n=8), protein  
162 translation proteins (n=8), growth factors (n=23), RAS signaling proteins (n=25), NFκB signaling proteins  
163 (n=23(10)), upregulated inflammatory proteins (n=34), downregulated inflammatory proteins (n=30),  
164 p53-mediated apoptosis proteins (n=15(1)), FAS-mediated apoptosis proteins (n=10), protection and survival  
165 proteins (n=27(7)), endoplasmic reticulum stress proteins (n=19(11)), SHH and Notch signaling proteins  
166 (11(3)), differentiation proteins (n=27(9)), neuromuscular differentiation proteins (19(10)), fibrosis proteins  
167 (19(16)), oncogenesis proteins (n=18(5)), angiogenesis proteins (n=26(11)), osteogenesis proteins (n=23(7)),  
168 and control housekeeping proteins (n=3) (numbers in parenthesis indicate number of overlapping antibodies,  
169 Table 1). Although the immunoprecipitation is unable to define the size-dependent expression of target protein  
170 compared to western blot, it collects every protein containing a specific epitope against antibody. Therefore,  
171 the IP-HPLC can detect whole target proteins, precursor and modified ones, similar to enzyme-linked  
172 immunosorbent assay (ELISA).  
173

174 Table 1. Antibodies used in the study.  
175

| Proteins                            | No.     | Antibodies                                                                                                                                                                                                                                                                                                                                                                                                   |
|-------------------------------------|---------|--------------------------------------------------------------------------------------------------------------------------------------------------------------------------------------------------------------------------------------------------------------------------------------------------------------------------------------------------------------------------------------------------------------|
| Proliferation-related proteins      | 13      | Ki-67*, PCNA*, PLK4*, MPM2*, CDK4*, cyclin D2*, cdc25A*, BRG1*, p14*, p15/16*, p21*, p27*, lamin A/C*                                                                                                                                                                                                                                                                                                        |
| cMyc/MAX/MAD network                | 6 (3)   | cMyc*, MAX*, MAD1*, (p27, CDK4, cyclin D2)                                                                                                                                                                                                                                                                                                                                                                   |
| p53/Rb/E2F signaling                | 7 (3)   | p53, E2F1*, Rb1 <sup>#</sup> , p-Rb1*, (cyclin D2, CDK4, p21)                                                                                                                                                                                                                                                                                                                                                |
| Wnt/ $\beta$ -catenin signaling     | 9       | Wnt1*, APC*, $\beta$ -catenin*, snail*, TCF1*, E-cadherin*, MMP9, vimentin*, VE-cadherin <sup>&amp;</sup> ,                                                                                                                                                                                                                                                                                                  |
| Epigenetic modification             | 8       | histone H1*, KDM4D <sup>S</sup> , HDAC10 <sup>S</sup> , MBD4*, DMAP1*, DNMT1*, PCAF*, EZH2                                                                                                                                                                                                                                                                                                                   |
| Protein translation                 | 8       | DOHH <sup>!</sup> , DHSP <sup>!</sup> , eIF5A1 <sup>!</sup> , eIF5A2 <sup>!</sup> , eIF2AK3 (PERK)*, p-eIF2AK3 (Thr981, p-PERK)*, eIF2 $\alpha^{\wedge}$ , p-eIF2 $\alpha$ (Ser51) <sup>^</sup>                                                                                                                                                                                                              |
| Growth factor                       | 23      | TGF- $\alpha$ , TGF- $\beta$ 1 <sup>#</sup> , TGF- $\beta$ 2*, TGF- $\beta$ 3*, SMAD2/3, SMAD4*, p-SMAD4, HGF $\alpha^*$ , Met*, FGF1*, FGF2*, FGF7*, GH*, GHRH*, IGF-1*, IGF2R*, HER1*, HER2*, PDGF-A*, CTGF*, ER $\beta^*$ , ALK1, EGF                                                                                                                                                                     |
| RAS signaling proteins              | 25      | NRAS <sup>S</sup> , KRAS <sup>S</sup> , HRAS*, STAT3*, p-STAT3 (p727), pAKT1/2/3, PI3K, Rab1*, RAF-B*, MEKK1, ERK1 (MAPK3)*, p-ERK1 (T202, Y204) <sup>S</sup> , JNK1 (MAPK8)*, p-JNK1, PKC*, p-PKC1 $\alpha$ (Thr514) <sup>@</sup> , mTOR <sup>@</sup> , p-mTOR, PTEN, p38 (MAPK14), p-p38 (Thr180, Tyr182), AKAP13, JAK2 <sup>S</sup> , TYK2*, (Thr308), SOS1*                                              |
| NF $\kappa$ B signaling proteins    | 23 (10) | NF $\kappa$ B*, IKK*, GADD45*, GADD153* (CHOP)*, p-GADD153, NRF2*, PGC-1 $\alpha^*$ , AMPK $\alpha^*$ , NFAT5, MDR*, SRC1*, NFAT5*, NFATC1*, (p38 (MAPK14), p-p38 (Thr180, Tyr182)*, mTOR <sup>@</sup> , p-mTOR*, PKC*, p-PKC1 $\alpha^*$ , JAK2*, RAF-B, MEKK1, AKAP13*)                                                                                                                                    |
| Upregulated inflammatory proteins   | 34      | TNF $\alpha^*$ , IL-1*, IL-6*, IL-10*, CD4*, CD8*, CD28*, CD31 (PECAM1)*, CD34, CD44 (HCAM)*, CD80 (B7-1)*, MMP1*, MMP1/8*, MMP12 <sup>S</sup> , TIMP1*, TIMP2*, M-CSF*, CXCR4*, CTLA4*, granzyme B, $\beta$ -defensin-1, MCP-1, HLA-DR, lactoferrin, kininogen*, TLR2*, TLR3*, TLR4*, TLR7*, integrin $\alpha$ 2*, integrin $\alpha$ 5*, versican*, CRP*, perforin*                                         |
| Downregulated inflammatory proteins | 30      | IL-8*, IL-12*, IL-28*, CD3*, CD20*, CD40*, CD54 (ICAM1)*, CD56 (NCAM)*, CD68*, CD99 (MIC2)*, CD106 (VCAM1)*, MMP2*, MMP3 <sup>S</sup> , MMP9 <sup>S</sup> , MMP10, cathepsin C*, cathepsin G*, cathepsin K*, lysozyme*, hepcidin, $\alpha$ 1-antitrypsin <sup>&amp;</sup> , $\beta$ -defensin-2, $\beta$ -defensin-3, COX1*, COX2*, LTA4H <sup>&amp;</sup> , elafin, integrin $\beta$ 1, LL-37, PD-1 (CD279) |
| p53-mediated apoptosis              | 15 (1)  | (p53)*, p73, MDM2*, BAD*, BAK*, NOXA*, PUMA*, BAX*, BCL2*, APAF1*, caspase 9*, c-caspase 9*, AIF*, PARP-1*, c-PARP*                                                                                                                                                                                                                                                                                          |
| FAS-mediated apoptosis              | 10      | FASL*, FAS*, FADD*, FLIP*, BID*, caspase 3*, c-caspase 3*, caspase 7, c-caspase 8*, c-caspase 10*                                                                                                                                                                                                                                                                                                            |

|                                       |                 |                                                                                                                                                                                                                                                                                                                                                      |
|---------------------------------------|-----------------|------------------------------------------------------------------------------------------------------------------------------------------------------------------------------------------------------------------------------------------------------------------------------------------------------------------------------------------------------|
| Protection- and survival proteins     | 27 (7)          | HO-1*, HSP27*, HSP70*, HSP90α/β*, SOD1*, GSTO1/2*, NOS1 <sup>§</sup> , TERT*, LC3β, SVCT2 <sup>&amp;</sup> , SP1 <sup>@</sup> , SP3 <sup>@</sup> , leptin*, SIRT1*, SIRT3*, SIRT6*, SIRT7*, FOXP3*, FOXP4*, PLC-β2*, (AMPKα, pAKT1/2/3, mTOR, PKC, p-PKC1α, NRF2, PGC-1α)                                                                            |
| Endoplasmic reticulum stress proteins | 19 (11)         | ATF4*, ATF6α*, BIP*, IRE1α, AP1M1, calnexin, caveolin-1, endothelin-1, (HSP-27, HSP-70, eIF2AK3* (PERK), p-eIF2AK3 (p-PERK), eIF2α <sup>^</sup> , p-eIF2α (Ser51) <sup>^</sup> , GADD153 (CHOP)*, p-GADD153*, PGC-1α*, LC3β*, AIF*)                                                                                                                  |
| SHH and Notch signaling proteins      | 11 (3)          | SHH*, PTCH1*, GLI1*, EpCAM*, Notch1*, Jagged2*, HIF1α*, VEGF-A*, (CD44 (HCAM), BCL2, Wnt1)                                                                                                                                                                                                                                                           |
| Cytodifferentiation proteins          | 27 (9)          | α-actin*, p63 <sup>§</sup> , vimentin*, TGase 2 <sup>+</sup> , TGase 4 <sup>+</sup> , HK2*, FAK*, CaM*, CRIP1*, cystatin A*, SOX9, AP1M1*, Krox-25, DLX2, TBX22, laminin α5*, pancreatic lipase, PSA, (caveolin-1*, PKC, p-PKC1α, AKAP13, calnexin, PLC-β2, EpCAM, E-cadherin, VE-cadherin)                                                          |
| Neuro-muscular differentiation-       | 19 (10)         | NSEγ*, NK1R*, GFAP*, S-100*, myosin 1a, MYH2*, desmin*, NF1*, α-SMA*, (CaM, calnexin, CRIP1*, cystatin A, AP1M1*, FAK, SHH, β-catenin, Wnt1, TGase 2)                                                                                                                                                                                                |
| Fibrosis proteins                     | 19 (16)         | (FGF1, FGF2, FGF7, TGF-β1, CTGF, PDGF-A, collagen 3A1, collagen 4, collagen 5A, laminin α5, integrin α2, integrin α5, integrin β1, α1-antitrypsin <sup>&amp;</sup> , elafin, endothelin-1*), CMG2, PAI-1*, plasminogen*                                                                                                                              |
| Oncogenesis proteins                  | 18 (5)          | PTEN <sup>&amp;</sup> , BRCA1 <sup>&amp;</sup> , BRCA2 <sup>&amp;</sup> , ATM*, maspin*, DMBT1*, PIM-1*, CEA <sup>§</sup> , 14-3-3θ*, survivin <sup>@</sup> , mucin 1*, mucin 4*, YAP1*, (NF1*, PTCH-1, MBD4, p53, Rb1)                                                                                                                              |
| Angiogenesis proteins                 | 26 (12)         | HIF1α <sup>&amp;</sup> , angiogenin <sup>§</sup> , VEGF-A*, VEGF-C*, VEGF-D, VEGFR2*, p-VEGFR2 (Y951), vWF <sup>§</sup> , CMG2 <sup>§</sup> , FLT4 <sup>§</sup> , LYVE1*, fibrinogen*, kininogen-1, TEM8, (plasminogen*, FGF2, PDGF-A, CD31 (PECAM1)*, CD44 (HCAM)*, CD54 (ICAM-1)*, CD56 (NCAM), CD106 (VCAM1), MMP2, MMP10, PAI-1*, endothelin-1*) |
| Osteogenesis proteins                 | 23 (7)          | BMP2*, BMP3*, BMP4*, BMPR1B, BMPR2, osteocalcin*, osteopontin*, osteonectin*, RUNX2*, osterix*, ALP*, aggrecan*, OPG*, RANKL*, DMP1*, SOSTDC1*, (versican*, TGF-β1, CTGF*, cathepsin K*, HSP-90α/β*, SMAD4, ATF4)                                                                                                                                    |
| Control housekeeping proteins         | 3               | α-tubulin*, β-actin*, GAPDH*                                                                                                                                                                                                                                                                                                                         |
| <b>Total</b>                          | <b>403 (97)</b> |                                                                                                                                                                                                                                                                                                                                                      |

176 \* Santa Cruz Biotechnology, USA; # DAKO, Denmark; <sup>§</sup> Neomarkers, CA, USA; <sup>@</sup> ZYMED, CA, USA; <sup>&</sup> Abcam, Cambridge, UK; <sup>^</sup> Cell  
177 signaling technology, USA; <sup>!</sup> kindly donated from M. H. Park in NIH, USA [37]; <sup>+</sup> kindly donated from S. I. Chung in NIH, USA [38, 39];  
178 the number of antibodies overlapped; ( ).  
179 **Abbreviations:** AIF: apoptosis inducing factor, AKAP13: A-kinase anchoring proteins 13, ALK1: activin receptor-like kinase 1, ALP:  
180 alkaline phosphatase, AMPK: AMP-activated protein kinase, pAKT: v-akt murine thymoma viral oncogene homolog, p-Akt1/2/3

181 phosphorylated (p-Akt, Thr 308), APAF1: apoptotic protease-activating factor 1, APC: adenomatous polyposis coli, ATF4: activating  
182 transcription factor 4, ATM: ataxia telangiectasia caused by mutations, BAD: BCL2 associated death promoter, BAK: BCL2  
183 antagonist/killer, BAX: BCL2 associated X, BCL2: B-cell leukemia/lymphoma-2, BID: BH3 interacting-domain death agonist, BIP  
184 (GRP 78): binding immunoglobulin protein, BMP2: bone morphogenesis protein 2, BMPR1B: Bone morphogenetic protein receptor  
185 type-1B, BRCA1: breast cancer type 1 susceptibility protein, BRG1 (SMARCA4): transcription activator, c-caspase 3: cleaved-caspase  
186 3, CaM: calmodulin, CD3: cluster of differentiation 3, cdc25A: cell division cycle 25A, CDK4: cyclin dependent kinase 4, CEA:  
187 carcinoembryonic antigen, CHOP: C/EBP homologous protein, CMG2: capillary morphogenesis protein 2 (anthrax toxin receptor 2),  
188 COX1: cyclooxygenase-2, CRP: C-reactive protein, CTGF: connective tissue growth factor, CTLA4: cytotoxic T  
189 lymphocyte-associated protein-4, CXCR4: C-X-C chemokine receptor type 4, DHS: deoxyhypusine synthase, DLX2, homeobox protein  
190 Distal-less (Dlx) family, DMAP1: DNA methyltransferase 1 associated protein, DMBT1: deleted in malignant brain tumors 1, DNMT1:  
191 DNA 5-cytosine methyltransferase 1, DOHH: deoxyhypusine hydroxylase, E2F1: transcription factor, eIF2AK3 (PERK): protein kinase  
192 R (PKR)-like endoplasmic reticulum kinase (PERK), eIF5A1: eukaryotic translation initiation factor 5A-1, EpCAM: Epithelial cell  
193 adhesion molecule, ER $\beta$ : estrogen receptor beta, EZH2 (ENX-1): enhancer of zeste homolog 2, FADD: FAS associated via death  
194 domain, FAK: focal adhesion kinase, FAS: CD95/Apo1, FASL: FAS ligand, FGF1: fibroblast growth factor 1, FLIP: FLICE-like  
195 inhibitory protein, FLT4: Fms-related tyrosine kinase 4, FOXP3: forkhead box P3, GADD45: growth arrest and  
196 DNA-damage-inducible 45, GAPDH: glyceraldehyde 3-phosphate dehydrogenase, GFAP: glial fibrillary acidic protein, GH: growth  
197 hormone, GHRH: growth hormone-releasing hormone, GSTO1/2: glutathione S-transferase  $\omega$  1/2, HCAM (CD44): homing cell  
198 adhesion molecule, HDAC10: histone deacetylase 10, HER1: human epidermal growth factor receptor 1, HGF $\alpha$ : hepatocyte growth  
199 factor  $\alpha$ , HIF1 $\alpha$ : hypoxia inducible factor-1 $\alpha$ , HO-1: heme oxygenase 1, HRAS: GTPase HRas, HSP70: heat shock protein 70, ICAM-1  
200 (CD54): intercellular adhesion molecule 1, IGF-1: insulin-like growth factor 1, IGFIIR: insulin-like growth factor 2 receptor, IKK:  
201 ikappaB kinase, IL-1: interleukin-1, IRE1 $\alpha$  (ERN1): inositol-requiring enzyme 1  $\alpha$ , JAK2: Janus kinase 2, JNK1: Jun N-terminal  
202 protein kinase 1, KDM4D: Lysine-specific demethylase 4D, KRAS: V-Ki-ras2 Kirsten rat sarcoma viral oncogene homolog, LC3 $\beta$ :  
203 microtubule-associated protein 1A/1B-light chain 3 $\beta$ , LTA4H: leukotriene A4 hydrolase, LYVE1: lymphatic vessel endothelial  
204 hyaluronan receptor 1, MAD1: mitotic arrest deficient 1, ERK1 (extracellular signal-regulated protein kinase 1, MAPK3  
205 (mitogen-activated protein kinase 3)), maspin: mammary serine protease inhibitor, MAX: myc-associated factor X, MBD4:  
206 methyl-CpG-binding domain protein 4, MCP1: monocyte chemotactic protein 1, M-CSF: macrophage colony-stimulating factor,  
207 MDM2: mouse double minute 2 homolog, MDR: multiple drug resistance, MEKK1, MMP1: matrix metalloprotease 1, MPM2: mitotic  
208 protein monoclonal 2, mTOR: mammalian target of rapamycin, cMyc: V-myc myelocytomatosis viral oncogene homolog, MYH2:  
209 myosin-2, NF $\kappa$ B: nuclear factor kappa-light-chain-enhancer of activated B cells, NCAM (CD56): neural cell adhesion molecule 1, NF1:  
210 neurofibromin 1, NFAT5: nuclear factor of activated T cells 5, NFATC1: nuclear factor of activated T-cells, cytoplasmic 1, NF $\kappa$ B:  
211 nuclear factor kappa-light-chain-enhancer of activated B cells, NOS1: nitric oxide synthase 1, NOXA:  
212 Phorbol-12-myristate-13-acetate-induced protein 1, NRAS: neuroblastoma RAS Viral Oncogene homolog, NRF2: nuclear factor  
213 (erythroid-derived)-like 2, OPG: osteoprotegerin, PAI-1: plasminogen activator inhibitor-1, PARP-1: poly-ADP ribose polymerase 1,  
214 c-PARP-1: cleaved-PARP-1, PCAF: p300/CBP-associated factor, PCNA: proliferating cell nuclear antigen, PD-1 (CD279):  
215 programmed cell death protein 1, PDGF-A: platelet-derived growth factor-A, PECAM-1 (CD31): platelet endothelial cell adhesion  
216 molecule-1, PERK: protein-like endoplasmic reticulum kinase, PGC-1 $\alpha$ : peroxisome proliferator-activated receptor gamma coactivator  
217 1 $\alpha$ , PI3K: phosphatidylinositol-3-kinase, PIM-1: Proto-oncogene serine/threonine-protein kinase 1, PKC: protein kinase C, PLC- $\beta$ 2:  
218 1-phosphatidylinositol-4,5-bisphosphate phosphodiesterase  $\beta$ -2, PLK4: polo like kinase 4 or serine/threonine-protein kinase, PSA:  
219 prostate-specific antigen, PTEN: phosphatase and tensin homolog, PUMA: p53 upregulated modulator of apoptosis, Rab1: RAS-related  
220 protein, Rab GTPases, RAF-B: v-Raf murine sarcoma viral oncogene homolog B, RANKL: receptor activator of nuclear factor kappa-B  
221 ligand, Rb-1: retinoblastoma-1, RUNX2: Runt-related transcription factor-2, SHH: sonic hedgehog, SIRT3: sirtuin (silent mating type  
222 information regulation 2 homolog) 3, NAD-dependent deacetylase,  $\alpha$ -SMA: alpha-smooth muscle actin, SMAD4: mothers against  
223 decapentaplegic, drosophila homolog 4, SOD1: superoxide dismutase-1, SOS1: son of sevenless homolog 1, SOSTDC1: sclerostin  
224 domain-containing protein 1, SOX9: SRY (sex-determining region Y)-related HMG-box transcription factor 9, SPI: specificity protein

225 1, SRC1: steroid receptor coactivator-1, STAT3: signal transducer and activator of transcription-3, SVCT2: sodium-dependent vitamin  
226 C transporter 2, TBX22: T-box transcription factor 22, TEM8: tumor-specific endothelial marker 8 (anthrax toxin receptor 1), TERT:  
227 human telomerase reverse transcriptase, TGase 2: transglutaminase 2, TGF- $\beta$ 1: transforming growth factor- $\beta$ 1, TNF $\alpha$ : tumor necrosis  
228 factor- $\alpha$ , VCAM-1: vascular cell adhesion molecule-1, VE-cadherin: vascular endothelial cadherin, VEGF-A vascular endothelial  
229 growth factor A, VEGFR2: vascular endothelial growth factor receptor 2, p-VEGFR2: phosphorylated vascular endothelial growth  
230 factor receptor 2 (Y951), vWF: von Willebrand factor, Wnt1: proto-oncogene protein Wnt1, YAP1: Yes-associated protein 1.  
231



232 The supernatant of the antibody-incubated column was removed, and followed by  
233 immunoprecipitation-based IP-HPLC. Briefly, each protein sample was mixed with 5 mL of binding buffer  
234 (150mM NaCl, 10mM Tris pH 7.4, 1mM EDTA, 1mM EGTA, 0.2mM sodium vanadate, 0.2mM PMSF and  
235 0.5% NP-40) and incubated in the antibody-bound protein A/G agarose bead column on a rotating stirrer at  
236 room temperature for 1 h. After multiple washing of the columns with Tris-NaCl buffer, pH 7.5, in a graded  
237 NaCl concentration (0.15 – 0.3M), the target proteins were eluted with 300 $\mu$ L of IgG elution buffer (Pierce,  
238 USA). The immunoprecipitated proteins were analyzed using a precision HPLC unit (1100 series, Agilent,  
239 Santa Clara, CA, USA) equipped with a reverse-phase column and a micro-analytical UV detector system (SG  
240 Highteco, Hanam, Korea). Column elution was performed using 0.15M NaCl/20% acetonitrile solution at 0.5  
241 mL/min for 15 min, 40°C, and the proteins were detected using a UV spectrometer at 280 nm. The control and  
242 experimental samples were run sequentially to allow comparisons. For IP-HPLC, the whole protein peak areas  
243 (mAU\*s) were obtained and calculated mathematically using an analytical algorithm (see supplementary data  
244 1) by subtracting the negative control antibody peak areas, and protein expression levels were compared and  
245 normalized using the square roots of protein peak areas. The ratios of the protein levels between the  
246 experimental and control groups were plotted into line and star graphs. Protein expressional changes of less than  
247  $\pm 5\%$ ,  $\pm 5\text{-}10\%$ ,  $\pm 10\text{-}20\%$ , or over  $\pm 20\%$  changes were described as minimal, slight, significant, or marked,  
248 respectively [30-33, 40]. The housekeeping proteins including  $\beta$ -actin,  $\alpha$ -tubulin, and glyceraldehyde  
249 3-phosphate dehydrogenase (GAPDH) were simultaneously used as internal controls.

250 In the previous study, the IP-HPLC results were compared with western blot data using cytoplasmic  
251 housekeeping protein ( $\beta$ -actin), the former showed minute error ranges less than  $\pm 5\%$  which were appropriate  
252 for statistical analysis, while the latter showed a large error range of more than 20% which were impossible to  
253 be analyzed statistically [40] (see Supplementary data 2). Therefore, the present study mainly performed

254 IP-HPLC, and its results were compared to representative findings of ICC and western blot performed with  
255 some selected antisera, even though ICC and western blot are usually involved with great error range ( $\geq 20\%$ ).

256

## 257 **Double IP-HPLC**

258 The double IP-HPLC was designed to detect a protein complex or a binding body contained two  
259 different proteins. The first IP-HPLC was performed using the first antibody against one protein of complex  
260 as the above procedures to get 300  $\mu\text{L}$  protein elute, which was applied as a protein sample in the second  
261 IP-HPLC. Subsequently, the second IP-HPLC was performed using the second column containing protein  
262 A/G beads bound with the second antibody against the other protein of complex. The protein elute sample was  
263 incubated with the protein A/G beads in the second column, and followed the same procedures of IP-HPLC  
264 described above.

265

## 266 **Global protein expression indexes**

267 As the overexpression and under-expression of essential 150 proteins observed in this study showed  
268 characteristics of 21 cellular functions affected by 10  $\mu\text{g}/\text{mL}$  PTX. The maximum expression value (%) of  
269 upregulated proteins and the minimum protein expression values (%) of downregulated proteins at 12, 24, 48 h  
270 after 10  $\mu\text{g}/\text{mL}$  PTX treatment were selected and plotted into a star graph.

271

## 272 **Statistical analysis**

273 Proportional data (%) of the experimental and control groups were plotted on line graphs and star plots.  
274 Their analyses were repeated two to six times until the standard deviations reached  $\leq \pm 5\%$ . The line graphs

275 revealed time-dependent expression changes between the relevant proteins, and the star plots revealed the  
276 different expression levels of all proteins examined. The results were analyzed by measuring the standard error  
277 ( $s = \pm \sqrt{\frac{\sigma^2}{n}}$ ). The expression of the control housekeeping proteins, i.e.,  $\beta$ -actin,  $\alpha$ -tubulin, and glyceraldehyde  
278 3-phosphate dehydrogenase (GAPDH) was non-responsive ( $\leq 5\%$ ) to 12, 24, or 48 h of PTX treatment [40, 41]  
279 (see Supplementary data 3).

280  
281

## 282 **Results**

### 283 **Proliferation by cytological cell counting assay**

284 10  $\mu\text{g/mL}$  PTX-treated RAW 264.7 cells were evenly spread on two-well culture slide dishes and cultured  
285 for 48 h. Their monotonous small round nuclei were stained with hematoxylin, and then well distinguishable  
286 under microscope. They were increased in cell number depending on time, at 0, 12, 24, and 48 h (Fig. 1). The  
287 number of RAW 264.7 cells observed at x400 magnification was  $1273.2 \pm 72.48$  at 0 h, as a control,  
288  $1317.1 \pm 71.42$  at 12 h,  $1358 \pm 61.16$  at 24 h, and  $1415 \pm 89.41$  at 48 h after PTX treatment. 10  $\mu\text{g/mL}$  PTX  
289 increased the proliferation index of RW 264.7 cells by 3.5%, 6.7%, and 11.2% compared to the untreated  
290 controls at 12, 24, and 48 h, respectively (Figs 1 A-D and E).

291

292 **Figure 1.** Proliferation of RAW 264.7 cells by direct cell counting with hematoxylin staining. 10  $\mu\text{g/mL}$   
293 PTX-treated RAW 264.7 cells showed the increase of proliferation by 3.5% at 12 h, 6.7% at 24 h, and 11.2% at  
294 48 h compared to the non-treated controls. A-D: Histological observation at x400 magnification, E: Statistical  
295 analysis plotted into a rod graph, cell number versus culture time (0, 12, 24, and 48 h).

296

## 297 **Immunocytochemical observation**

298       The characteristic protein expressions were observed in RAW 264.7 cells through immunocytochemical  
299 (ICC) staining, that is, Ki-67, a marker of proliferation was strongly positive in 10 µg/mL PTX-treated cells at  
300 12, 24, and 48 h compared to the untreated controls, and KDM4D and PCAF, markers of histone  
301 demethylation and acetylation, respectively, were strongly positive at 12 and 24 h. For the immunoreaction of  
302 inflammatory proteins, 10 µg/mL PTX-treated cells showed stronger positivity of TNF $\alpha$ , TLR3, and TLR4 at  
303 24 and 48 h compared to the untreated controls, and increased positivity of IL-6 at 12, 24, and 48 h (Fig. 3).

304

305 **Figure 2.** Immunocytochemical staining of Ki-67 (A), KMD4D (B), PCAF (C), TNF $\alpha$  (D), IL-6 (E), TLR3  
306 (F), and TLR4 (G) in RAW 264.7 cells after 10 µg/mL PTX treatment for 0, 12, 24, and 48 hours. Noted the  
307 cytoplasmic (arrow heads) and nuclear (arrows) localization of different immunoreactions in monocytic round  
308 cells. No counter stain.

309

310 10 µg/mL PTX-treated cells showed slight increase of immunoreaction for GSTO1/2 (a marker of  
311 antioxidant and cellular stress) and LC3β (a marker of autophagosome biogenesis), compared to the untreated  
312 controls. Caspase 3, a marker of apoptosis executor was markedly positive in 10 µg/mL PTX-treated cells at  
313 12, 24, and 48 h, while the immunoreaction of GADD153 (CHOP, a marker of endoplasmic reticulum stress)  
314 and PARP-1 (a marker of DNA damage) was almost similar in the experimental and control cells.

315

316 **Figure 3.** Immunocytochemical staining of GSTO1/2 (A), LC3β (B), GADD153 (C), PARP-1(D), and  
317 caspase-3 (E) in RAW 264.7 cells after 10 µg/mL PTX treatment for 0, 12, 24, and 48 hours. Noted the  
318 cytoplasmic (arrow heads) and nuclear (arrows) localization of different immunoreactions in monocytic round  
319 cells. No counter stain.

320

321 10 µg/mL PTX-treated cells showed slight increase of NSEγ immunoreaction at 24 and 48 h compared  
322 to the untreated controls, and marked increase of MYH2 (a marker of muscular differentiation)  
323 immunoreaction at 12, 24, and 48 h. Regarding the markers of osteoblastic differentiation, RUNX2, OPG,  
324 BMPR2, and TGF-β1 were markedly positive in 10 µg/mL PTX-treated cells at 12, 24, and 48 h. These  
325 results indicate 10 µg/mL PTX affect RAW 264.7 cells to have a potential for neuro-muscular and osteogenic  
326 differentiation.

327

328 **Figure 4.** Immunocytochemical staining of NSEγ (A), MYH2 (B), TGF-β1 (C), RUNX2 (D), OPG (E), and  
329 BMPR2 (F) in RAW 264.7 cells after 10 µg/mL PTX treatment for 0, 12, 24, and 48 hours. Noted the  
330 cytoplasmic (arrow heads) and nuclear (arrows) localization of different immunoreactions in monocytic round  
331 cells. No counter stain.

332

### 333 **Western blot detection for selected proteins**

334 For the proteins relevant to proliferation, 10 µg/mL PTX-treated cells showed stronger bands for markers  
335 of cell proliferation (Ki-67), p53/Rb signaling (p53, Rb1, and E2F1), Wnt/β-catenin signaling (Wnt1, β-catenin,  
336 TCF1), and guided cell migration (E-cadherin and VE-cadherin) at 12, 24, and 48 h than the untreated controls.  
337 Among the cMyc/MAX/MAD network proteins, the bands of cMyc and MAX were gradually attenuated at 12,  
338 24, and 48 h, while the bands of MAD1 were increased. The proteins relevant to epigenetic modification,  
339 KDM4D and HDAC10 were increased in 10 µg/mL PTX-treated cells at 12, 24, and 48 h versus the untreated  
340 controls. RAS signaling proteins, KRAS, HRAS, NRAS, ERK1, and p-ERK1 were also increased at 12, 24, and  
341 48 h (Fig. 5).

342

343 **Figure 5.** Western blot analysis for 10 µg/mL PTX-induced protein expression in RAW 264.7 cells regarding  
344 the proliferation (Ki-67), p53/Rb/E2F signaling (p53, Rb1, and E2F1), Wnt/β-catenin signaling (Wnt1,  
345 β-catenin, and TCF1), guided cell migration (E-cadherin and VE-cadherin), cMyc/MAX/MAD network  
346 (cMyc, MAX, and MAD1), epigenetic modification (KDM4D and HDAC10), and RAS signaling (KRAS,  
347 HRAS, NRAS, ERK1, and p-ERK1). The level of β-actin expression was used as an internal control.

348

349 TNFα, an inflammatory cytokine, TLR2 and TLR4, markers of innate immunity were increased in 10  
350 µg/mL PTX-treated cells at 12, 24, and 48 h compared to the untreated controls. ER stress proteins, eIF2AK3  
351 and p-eIF2AK3, a marker for autophagy formation, LC3β, and an apoptosis executing protein, caspase 3 were  
352 coincidentally increased at 24 and 48 h. 10 µg/mL PTX-treated cell showed stronger bands of osteoblastic  
353 differentiation proteins, TGF-β1, BMP2, RUNX2, and ATF4 than the untreated controls, and slightly strong  
354 bands of nerve differentiation proteins, NSEγ and NF1, and muscle differentiation proteins, MYH2 and  
355 desmin at 12, 24, and 48 h compared to the untreated controls (Fig. 6).

356

357 **Figure 6.** Western blot analysis for 10 µg/mL PTX-induced protein expression in RAW 264.7 cells regarding  
358 the inflammation (TNF $\alpha$ , TLR2, and TLR4), ER stresses (eIF2AK3, p-eIF2AK3, ATF4, LC3 $\beta$ , and caspase 3),  
359 osteoblastic differentiation (TGF- $\beta$ 1, BMP2, and RUNX2), neurogenic differentiation (NSE $\gamma$  and NF1), and  
360 muscular differentiation (MYH2 and desmin). The level of  $\beta$ -actin expression was used as an internal control.

361

362 Additionally, 300 µg/mL PTX-induced protein expressions in RAW 264.7 cells were also explored by  
363 western blot, and compared with 10 µg/mL PTX-induced protein expressions. 300 µg/mL PTX slightly  
364 decreased the expression of Ki-67, cMyc, MAX, E2F1, Wnt1, and TCF1 at 12, 24, and 48 h versus the  
365 untreated controls, while 10 µg/mL PTX increased the protein expressions of Ki-67, E2F1, Wnt1, and TCF1,  
366 and decreased the protein expressions of cMyc and MAX. The expression of HDAC10 was gradually  
367 decreased by 300 µg/mL PTX at 12, 24, and 48 h, while slightly increased by 10 µg/mL PTX.

368 Regarding RAS signaling, KRAS, ERK1, and pERK1 were slightly downregulated by 300 µg/mL PTX  
369 at 12, 24, and 48 h, while upregulated by 10 µg/mL PTX. Apoptosis proteins, p53 and c-caspase 3 were rarely  
370 affected by 300 µg/mL PTX, while 10 µg/mL PTX slightly decreased the p53 expression at 12, 24, and 48 h  
371 but increased the c-caspase 3 expression at 12, 24, and 48 h. The ER stress proteins, eIF2AK3 and p-eIF2AK3  
372 were slightly upregulated by 300 µg/mL PTX, while eIF2AK3 and p-eIF2AK3 were slightly downregulated  
373 but ATF4 was upregulated by 10 µg/mL PTX.

374 The expressions of inflammatory proteins, TNF $\alpha$  and TLR2 were rarely affected by 300 µg/mL PTX  
375 compared to the untreated controls, while increased by 10 µg/mL PTX at 12, 24, and 48 h. And the  
376 expressions of osteogenesis proteins, BMP2, RUNX2, and ATF4 were slightly decreased by 300 µg/mL PTX,  
377 while increased by 10 µg/mL PTX at 12, 24, and 48 h. On the other hand, the TGF- $\beta$ 1 expression was rarely  
378 affected by 300 µg/mL PTX, while slightly increased by 10 µg/mL PTX at 12 and 24 h. And the expression of  
379 house-keeping protein,  $\beta$ -actin was almost not affected by 10 µg/mL and 300 µg/mL PTX at 12, 24, and 48 h.

380

381 **Figure 7.** Western blot comparison between 10 µg/mL and 300 µg/mL PTX-induced protein expressions in  
382 RAW 264.7 cells regarding the proliferation (Ki-67, cMyx, MAX, E2F1, Wnt1, and TCF1), epigenetic  
383 modification (HDAC10), RAS signaling (KRAS, ERK1, and pERK1), apoptosis (p53 and c-caspase 3), ER

384 stresses (eIF2AK3, p-eIF2AK3, and ATF4), inflammation (TNF $\alpha$  and TLR2), and osteogenesis (BMP2, and  
385 RUNX2). The level of  $\beta$ -actin expression was used as an internal control.

386

## 387 **Immunoprecipitation-based high performance liquid chromatography** 388 **(IP-HPLC) analysis**

389 10  $\mu$ g/mL PTX-treated RAW 264.7 cells were extensively explored for different protein expression by  
390 IP-HPLC using 403 antisera, and 300  $\mu$ g/mL PTX-treated cells were simply done using 61 antisera. The  
391 results of 10  $\mu$ g/mL PTX-induced protein expression were compared with the results of 300  $\mu$ g/mL  
392 PTX-induced protein expression. The IP-HPLC data were statistically analyzed and illustrated in line and star  
393 graphs as follows.

## 394 **Effects of 10 $\mu$ g/mL PTX on the expression of proliferation-related** 395 **proteins**

396 RAW 264.7 cells treated with 10  $\mu$ g/mL PTX for 12, 24, or 48 h showed significant increases in the  
397 expression of proliferation-activating proteins including Ki-67 (by 7.7% at 48h), proliferating cell nuclear  
398 antigen (PCNA, 7.3% at 48 h), polo-like kinase 4 (PLK4, a regulator of centriole duplication, 12.1% at 48h),  
399 CDK4 (4.2% at 12h), cyclin D2 (a regulator of cyclin-dependent kinase, 10.1% at 12 h), cell division cycle  
400 25A (cdc25A, 6.2% at 12h), transcription factor BRG1 (ATP-dependent chromatin remodeler SMARCA4, 4%  
401 at 24h), and reactive increase in the expression of p14ARF (an alternate reading frame (ARF) protein product  
402 of the CDKN2A locus, 17.2% at 24 h), p15/16INK (inhibitors of cyclin-dependent kinases (INK), 13% at 48  
403 h), and p21CIP1 (a CDK-interacting protein 1 (CIP1), 5.2% at 48 h) versus the untreated controls. On the other  
404 hand, the expressions of mitosis phase promoting factor (MPF) recognized by a mitosis-specific monoclonal  
405 antibody 2 (MPM2) and lamin A/C involved in nuclear stability, chromatin structure and gene expression were



406 decreased by 6.7% and 12.1% at 12 h, respectively, and the expression of p27KIP1 (a cyclin dependent kinase  
407 inhibitor protein 1 (KIP1), was minimally affected by PTX ( $\leq 5\%$ ) (Figs. 8 A and B).

408

## 409 **Effects of 10 $\mu\text{g}/\text{mL}$ PTX on the expression of cMyc/MAX/MAD network** 410 **proteins**

411 The expression of cMyc (regulator genes and proto-oncogenes that code for transcription factors) was  
412 increased by 8.2% at 12h after 10  $\mu\text{g}/\text{mL}$  PTX treatment but gradually decreased to the untreated control level  
413 at 48 h, the expression of MAX (bHLH-Zip protein forming heterodimer with cMyc) was decreased by 3% at  
414 48 h, while the expression of MAD-1 (bHLH-Zip protein forming heterodimer with MAX which can oppose  
415 functions of Myc-MAX heterodimers) was increased by 4.8% at 48 h versus the untreated controls (Figs. 8 C  
416 and D). Whereas the double IP-HPLC using first antibody of cMyc and second antibody of MAX or MAD-1  
417 showed that the heterodimers of cMyc and MAX were increased by 11% at 24 h and 11.9% at 48 h, while the  
418 heterodimer of cMyc and MAD-1 was decreased by 4.2% at 12 h and 2.1% at 24 h compared to the untreated  
419 controls (Figs. 8 E and F). On the other hand, the expressions of cMyc/MAX/MAD network interacting  
420 proteins, CDK4 and cyclin D2 were increased by 4.2% at 12 h and 10.1% at 12 h, respectively, but the  
421 expression of p27 (cyclin-dependent kinase inhibitor 1B) was minimally affected by PTX ( $\leq 5\%$ ) (Figs. 8 C  
422 and D).

423 In the double IP-HPLC using antisera of cMyc/MAX and cMyc/MAD1, the cMyc-MAX heterodimer  
424 was increased by 11% at 24 h and 11.9% at 48 H, while the cMyc-MAD heterodimer was decreased by 4.2%  
425 at 12 h and 2.1% at 24 h compared to the untreated controls. On the other hand, CDK4-p27 complex was  
426 consistently reduced by 4.6%, at 12 h, 4.1% at 24 h, and 4.7% at 48h in the double IP-HPLC using CDK4 and  
427 p27 antisera (Figs. 8 E and F).

428

429 **Figure 8.** Expression of proliferation-related proteins (A and B), cMyc/MAX/MAD network proteins (C and  
430 D), and double IP-HPLC for cMyc/MAX/MAD network protein complexes (E and F) in 10 µg/mL  
431 PTX-treated RAW 264.7 cells as determined by IP-HPLC. Line graphs, A, C, and E show protein expression on  
432 the same scale (%) versus culture time (12, 24, or 48 h), whereas the star plots (B, D, and F) show the  
433 differential expression levels of the proteins at 12, 24, or 48 h after PTX treatment on the appropriate scales (%).  
434 The thick black line, untreated controls (100%); the blue, yellow, and red dots show differential protein levels  
435 after PTX administration for 12, 24, or 48 h, respectively.

436

### 437 **Effects of 10 µg/mL PTX on the expression of p53/Rb/E2F signaling** 438 **proteins**

439 10 µg/mL PTX decreased the expression of tumor suppressor proteins, that is, p53 by 17.5% at 24 h, Rb1  
440 by 9.8% at 48 h, and phosphorylated Rb1 (p-Rb1) at 5.5% in RAW 264.7 cells versus the untreated controls,  
441 while the expression of objective transcription factor, E2F-1 was increased by 10.6% at 12 h. And the  
442 Ser/Thr-kinase components of cyclin D2 and CDK4 were upregulated by 10.1% and 4.2% at 12 h,  
443 respectively, and a cyclin-dependent kinase inhibitor protein, p21CIP1 was also upregulated by 5.2% at 48 h  
444 (Figs. 9 A and B).

445 In the double IP-HPLC using antisera of E2F1/Rb1, CDK4/p21, and E2F1/VE-cadherin, the E2F1-Rb1  
446 and CDK4-p21 complexes were increased by 8.4% and 12.9% at 24 H, respectively, but E2F1-VE-cadherin  
447 complex was minimally affected by 10 µg/mL PTX. On the other hand, CDK4-p27 complex was consistently  
448 reduced by 4.6% at 12 h, 4.1% at 24 h, and 4.7% at 48h in the double IP-HPLC using CDK4 and p27 antisera  
449 (Figs. 8 E and F).

450

451 **Effects of 10  $\mu\text{g}/\text{mL}$  PTX on the expression of Wnt/ $\beta$ -catenin signaling**  
452 **proteins**

453 10  $\mu\text{g}/\text{mL}$  PTX increased the protein expressions of Wnt1 (by 14.9% at 24 h),  $\beta$ -catenin (by 16% at 24 h),  
454 adenomatous polyposis coli (APC, by 16.8% at 48 h), snail (by 13.1% at 48 h), and T-cell factor 1 (TCF1, a  
455 transcription factor, by 15.9% at 12 h) versus the untreated controls. On the other hand, E-cadherin (a type-I  
456 transmembrane protein stabilized by  $\beta$ -catenin) and VE-cadherin (vascular endothelial cadherin) were  
457 increased by 17.4% at 48 h and 22.1% at 12 h, respectively, while the expressions of Wnt signaling cofactors,  
458 MMP9 and vimentin which are necessary in the process of epithelial-mesenchymal transition, were decreased  
459 by 10.4% and 12.9% at 24 h, respectively (Figs. 2 A1 and A2).

460 These results indicate Wnt/ $\beta$ -catenin signaling was enhanced with concomitant upregulation of Wnt1,  
461  $\beta$ -catenin, APC, snail, and TCF1 by 10  $\mu\text{g}/\text{mL}$  PTX, but the activation of Wnt/ $\beta$ -catenin signaling was not  
462 followed by overexpressions of MMP9 and vimentin, but led to the overexpression of E-cadherin and  
463 VE-cadherin.

464

465 **Figure 9.** Expression of p53/Rb/E2F signaling proteins (A and B), double IP-HPLC for p53/Rb/E2F signaling  
466 protein complexes (C and D), Wnt/ $\beta$ -catenin signaling proteins (E and F), and double IP-HPLC for  
467 Wnt/ $\beta$ -catenin signaling protein complexes (G and H) in 10  $\mu\text{g}/\text{mL}$  PTX-treated RAW 264.7 cells as  
468 determined by IP-HPLC. Line graphs, A, C, and E show protein expression on the same scale (%) versus culture  
469 time (12, 24, or 48 h), whereas the star plots (B, D, and F) show the differential expression levels of the proteins  
470 at 12, 24, or 48 h after PTX treatment on the appropriate scales (%). The thick black line, untreated controls  
471 (100%); the blue, yellow, and red dots show differential protein levels after PTX administration for 12, 24, or 48  
472 h, respectively.

473

## 474 **Effects of 10 µg/mL PTX on the expression of epigenetic modification**

### 475 **proteins**

476 10 µg/mL PTX increased the expression of histone H1 (by 10.6% at 24 h), lysine-specific demethylase 4D  
477 (KDM4D, 12% at 48 h), and p300/CBP-associated factor K (lysine) acetyltransferase 2B which has histone  
478 acetyl transferase activity (PCAF, by 14% at 12 h) versus the untreated controls, while decreased the expression  
479 of histone deacetylase 10 (HDAC10, 9.6% at 24 h), DNA (cytosine-5)-methyltransferase 1 (DNMT1: 23.5% at  
480 48 h), DNA methyltransferase 1-associated protein 1 (DMAP1: 17.7% at 48 h), histone-lysine  
481 N-methyltransferase enzyme (enhancer of zeste homolog 2 (EZH2), 6.6% at 24 h), and methyl-CpG binding  
482 domain 4 (MBD4: 6.7% at 12 h) (Figs. 10 A and B).

483

## 484 **Effects of 10 µg/mL PTX on the expression of protein translation proteins**

485 RAW 264.7 cells treated with 10 µg/mL PTX showed increase in the expression of protein translation  
486 protein: deoxyhypusine hydroxylase (DOHH, by 7.6% at 12 h), deoxyhypusine protein synthase (DHPS, 17.1%  
487 at 24 h), eukaryotic translation initiation factor 5A-1 (eIF5A1, 6.5% at 12 h), and eIF5A2 (7.5% at 24 h) versus  
488 the untreated controls. On the other hand, the essential factor for protein synthesis to form a ternary complex  
489 (TC) with GTP and the initiator Met-tRNA, that is, eIF2 $\alpha$  and p-eIF2 $\alpha$  were decreased by 8.7% at 12 h and 5.7%  
490 at 48 h, respectively, and eukaryotic translation initiation factor 2- $\alpha$  kinase 3 (eIF2AK3, a protein kinase R  
491 (PKR)-like endoplasmic reticulum kinase (PERK)) was decreased by 9.3% at 12 h, but p-eIF2AK3 was  
492 reactively increased by 6.7% at 48 h (Figs. 10 C and D).

493

## 494 **Effects of 10 µg/mL PTX on the expression of growth factor**

495 RAW 264.7 cells after 10 µg/mL PTX administration showed marked decrease in the expression of HGFα  
496 (by 17.5% at 24 h), Met (9.9% at 48 h), fibroblast growth factor-1 (FGF1, 5.5% at 12 h), FGF2 (10.3% at 12 h),  
497 FGF7 (2% at 48 h), connective tissue growth factor (CTGF, 17.7% at 24 h), and estrogen receptor-β (ERβ,  
498 14.1% at 24 h) versus the untreated controls. Particularly, PTX decreased the expression of TGF-α (by 21% at  
499 48 h), TGF-β1 (12.5% at 12 h), TGF-β2 (18.5% at 48 h), TGF-β3 (16.4% at 24 h), activin receptor-like kinase  
500 1 (ALK1, 14.6% at 12 h), SMAD2/3 (15.8% at 12 h), and HER1 (epidermal growth factor receptor, 13.4%),  
501 while compensatory increased the expression of SMAD4 (14.9% at 48 h), p-SMAD4 (7.1% at 24 h), growth  
502 hormone (GH, 11.4% at 48 h), growth hormone releasing hormone (GHRH, 16.9% at 48 h), insulin-like  
503 growth factor 2 receptor (IGF2R, 11.4% at 48 h), HER2 (EGF receptor tyrosine-protein kinase erbB-2, 9.6%  
504 at 24 h), and epidermal growth factor (EGF, 18.8% at 24 h). On the other hand, the expressions of FGF7,  
505 IGF1, and PDGF-A were affected minimally by PTX (≤5%) (Figs. 10 E and F).

506

507 **Figure 10.** Expression of epigenetic modification proteins (A and B), protein translation proteins (C and D),  
508 and growth factors (E and F) in 10 µg/mL PTX-treated RAW 264.7 cells as determined by IP-HPLC. Line  
509 graphs, A, C, and E show protein expression on the same scale (%) versus culture time (12, 24, or 48 h), whereas  
510 the star plots (B, D, and F) show the differential expression levels of the proteins at 12, 24, or 48 h after PTX  
511 treatment on the appropriate scales (%). The thick black line, untreated controls (100%); the blue, yellow, and  
512 red dots show differential protein levels after PTX administration for 12, 24, or 48 h, respectively.

513

514

## 515 **Effects of 10 µg/mL PTX on the protein expressions of RAS signaling** 516 **proteins**

517 10 µg/mL PTX affected RAS signaling protein expressions of RAW 264.7 cells positively or negatively.  
518 The RAS signaling proteins were initially upregulated at 12 and 24 h and subsequently became similar to  
519 control level or downregulated at 48 h by 10 µg/mL PTX, that is, Kirsten Rat Sarcoma virus oncogene (KRAS)  
520 to 121% at 12 h and 103.3% at 48 h, neuroblastoma RAS viral oncogene homolog (NRAS) to 102.7% at 24 h  
521 and 95.9% at 48 h, GTPase HRAS also known as transforming protein p21 (HRAS) to 110.3% at 12 h and  
522 106.5% at 48 h, signal transducer and activator of transcription 3 (STAT3) to 106.8% at 12 h and 99.1% 48 h,  
523 p-STAT3 to 106.7% at 24 h and 99.4% at 48 h, phosphorylated AKT1/2/3 (pAKT1/2/3: Thr 308, a critical  
524 mediator of growth factor-induced signals) to 106.5% at 24 h and 102.2% at 48 h, phosphatidylinositol 3-kinase  
525 (PI3K) to 113.6% at 24 h and 108% at 48 h, GTPases Rab to 110.2% at 12 h and 101.6% at 48 h,  
526 serine/threonine-protein kinase RAF-B to 107.6% at 12 h and 99.3% at 48 h, non-receptor tyrosine-protein  
527 kinase (TYK2, the first member of JAK family) to 122.9% at 12 h and 104.7% at 48 h, protein kinase C  
528 (PKC) to 108.6% at 24 h and 99.3% at 48 h, p-PKC1 $\alpha$  to 111.5% at 24 h and 103% at 48 h, and A-kinase  
529 anchoring proteins (AKAP13) to 116.4% at 24 h and 102.2% at 48 h versus the untreated controls. However,  
530 some downstream effector proteins of RAS signaling were consistently upregulated by 10 µg/mL PTX, that is,  
531 extracellular signal-regulated kinase 1 (a.k.a. mitogen-activated protein kinase 3, ERK1) by 8.6% at 24 h,  
532 pERK-1 by 9.3% at 24 h, p38 by 13.1% at 48 h, and p-p38 by 12.3% at 48 h.

533 Whereas the expressions of other RAS signaling proteins were decreased, that is, c-Jun N-terminal  
534 kinase-1 (JNK1) by 5.6% at 24 h, phosphorylated JNK1 (p-JNK1, Thr 183/Tyr 185) by 11.1% at 24 h, MEK  
535 kinase 1 (also designated MAP kinase kinase kinase 1, MKKK1, MAP3K1 or MEKK1) by 11.7% at 12 h,  
536 mammalian target of rapamycin (mTOR) by 19.5% at 24 h, phosphorylated mTOR (p-mTOR) by 15.7% at 48

537 h, Janus kinase 2 (JAK2, non-receptor tyrosine kinase) by 14.8% at 48 h, and son of sevenless homolog 1  
538 (SOS1) by 22.3% at 12 h. On the other hand, the expression of phosphatase and tensin homolog (PTEN) was  
539 affected minimally by PTX ( $\leq 5\%$ ) (Figs. 11 A and B).

540

## 541 **Effects of 10 $\mu\text{g}/\text{mL}$ PTX on the expression of NF $\kappa$ B signaling proteins**

542 10  $\mu\text{g}/\text{mL}$  PTX had different effects on the expression of NF $\kappa$ B signaling proteins in RAW 264.7 cells.  
543 PTX markedly upregulated nuclear factor kappa-light-chain-enhancer of activated B cells (NF $\kappa$ B) by 20.7% at  
544 24 h but slightly downregulated ikappaB kinase (IKK) by 6.8% at 12 h versus the untreated controls, and  
545 subsequently increased the expression of downstream effector proteins of NF $\kappa$ B signaling, that is, p38  
546 mitogen-activated protein kinase (p38) by 13.1% at 48 h, phosphorylated p38 (p-p38) by 12.3% at 48 h, growth  
547 arrest and DNA damage 45 (GADD45) by 18.7% at 48 h, multiple drug resistance (MDR) by 12.5% at 48 h,  
548 protein kinase C (PKC) by 8.6% at 24 h, p-PKC1 $\alpha$  by 11.5% at 24 h, steroid receptor co-activator-1 (SRC1) by  
549 12.3% at 48 h, and A-kinase anchoring proteins (AKAP13) by 16.4% at 24 h.

550 On the other hand, the expressions of some downstream regulating proteins of NF $\kappa$ B signaling were  
551 decreased, that is, mTOR by 19.5% at 24 h, p-mTOR by 15.7% at 48 h, and peroxisome proliferator-activated  
552 receptor gamma coactivator 1- $\alpha$  (PGC1 $\alpha$ ) by 12.1% at 24 h, MEKK1 by 11.7% at 12 h, JAK2 by 14.8% at 48 h,  
553 and nuclear factor of activated T-cells 1 (NFATC1) by 7.3% at 24 h. The expressions of GADD153, nuclear  
554 factor (erythroid-derived 2)-like 2 (NRF2), 5' AMP-activated protein kinase  $\alpha$  (AMPK $\alpha$ ), and nuclear factor of  
555 activated T cells (NFAT5) were only minimally affected by PTX ( $\leq 5\%$ ) (Figs. 11 C and D).

556

## 557 **Inflammatory proteins upregulated by 10 $\mu\text{g}/\text{mL}$ PTX**

558 Among the inflammatory proteins, some proteins were upregulated by 10  $\mu$ g/mL PTX in RAW 264.7 cells  
559 as follows, that is, tumor necrosis factor  $\alpha$  (TNF $\alpha$ ) by 10.6% at 24 h, interleukin-1 (IL-1) by 5.7% at 48 h, IL-6  
560 by 15.2% at 24 h, IL-10 by 10.9% at 24 h, CD4 by 25.3% at 48 h, CD8 by 7.3% at 24 h, CD31 by 4.6% at 48 h,  
561 CD34 by 22.2% at 24 h, CD44 (homing cell adhesion molecule (HCAM)) by 9.8% at 48 h, CD80 by 13.3% at  
562 24 h, matrix metalloproteinase 1 (MMP1) by 18.1% at 24 h, MMP1/8 by 10.8% at 48 h, tissue inhibitor of  
563 metalloproteinase 1 (TIMP1) by 14.7% at 48 h, TIMP-2 by 5.2% at 48 h, macrophage colony-stimulating factor  
564 (M-CSF) by 14%% at 48 h, C-X-C chemokine receptor type 4 (CXCR4, a.k.a. CD184) by 13.5% at 48 h,  
565 cytotoxic T lymphocyte-associated protein-4 (CTLA4) by 8.4% at 24 h, granzyme B by 9.1% at 12 h but  
566 decreased by 10.2% at 12 h,  $\beta$ -defensin-1 by 11.4% at 12 h, monocyte chemotactic protein-1 (MCP1) by 10.1%  
567 at 48 h, human leukocyte antigen - DR isotype (HLA-DR) by 13.3% at 48 h, lactoferrin by 16% at 24 h,  
568 kininogen by 6.5% at 12 h, toll-like receptor 3 (TLR3) by 10.9% at 48 h, TLR4 by 11.7% at 48 h, integrin  $\alpha$ 2  
569 by 16% at 24 h, integrin  $\alpha$ 5 by 12.2% at 48 h, chondroitin sulfate proteoglycan versican by 16.9% at 24 h, and  
570 perforin by 14.7% at 24 h. On the other hand, the expression of MMP12, TLR2, TLR7, and C-reactive protein  
571 (CRP) showed a trend of increase but were only minimally affected by PTX ( $\leq$  5%) (Figs. 11 E and F).

572

573 **Figure 11.** Expression of RAS signaling proteins (A and B), NF $\kappa$ B signaling proteins (C and D), and  
574 upregulated inflammatory proteins (E and F) in 10  $\mu$ g/mL PTX-treated RAW 264.7 cells as determined by  
575 IP-HPLC. Line graphs, A, C, and E show protein expression on the same scale (%) versus culture time (12, 24,  
576 or 48 h), whereas the star plots (B, D, and F) show the differential expression levels of the proteins at 12, 24, or  
577 48 h after PTX treatment on the appropriate scales (%). The thick black line, untreated controls (100%); the  
578 blue, yellow, and red dots show differential protein levels after PTX administration for 12, 24, or 48 h,  
579 respectively.

580

581



## 582 **Inflammatory proteins downregulated by 10 µg/mL PTX**

583        Among the inflammatory proteins, some proteins were downregulated by 10 µg/mL PTX in RAW 264.7  
584 cells as follows: IL-8 by 7.5% at 12 h, IL-12 by 5.4% at 48 h, IL-28 by 17.9% at 48 h, CD3 by 14% at 12 h,  
585 CD20 by 18.3% at 12 h, CD28 by 10.2% at 12 h, CD54 (Intercellular Adhesion Molecule 1 (ICAM-1)) by  
586 12.6% at 12 h, CD56 (Neural Cell Adhesion Molecule (NCAM)) by 18.8% at 24 h, CD99 by 15.3% at 12 h,  
587 CD106 (Vascular Cell Adhesion Molecule-1 (VCAM-1)) by 15.5% at 12 h, MMP-2 by 16.3% at 24 h, MMP3  
588 by 12.7% at 12 h, MMP9 by 10.5% at 24 h, MMP10 by 9.4% at 12 h, cathepsin C by 10.8% at 24 h, cathepsin G  
589 by 23% at 24 h, cathepsin K by 9.2% at 48 h, lysozyme by 10.9% at 24 h, hepcidin by 17.4% at 24 h,  
590 α1-antitrypsin by 17% at 24 h, β-defensin 2 by 6.9% at 48 h, β-defensin 3 by 11.4% at 12 h, cyclooxygenase 1  
591 (COX1) by 20.3% at 24 h, COX2 by 12.4% at 48 h, leukotriene A4 hydrolase (LTA4H) by 10.6% at 48 h,  
592 elafin by 5.2% at 48 h, integrin β1 by 8.7% at 12 h, and LL-37 by 19.5% at 24 h. On the other hand, the  
593 expression of CD40 and programmed cell death protein 1/1 (PD-1, CD279) showed a trend of decrease but  
594 were only minimally affected by PTX ( $\leq 5\%$ ) (Figs. 12 A and B).

595

## 596 **Effects of 10 µg/mL PTX on the expression of p53-mediated apoptosis** 597 **proteins**

598        10 µg/mL PTX significantly reduced the expression of p53-mediated pro-apoptotic proteins, that is, p53  
599 by 17.5% at 24 h, BCL2 homologous antagonist/killer (BAK) by 5.5% at 48 h, p73 by 23.9% at 12 h, NOXA (a  
600 pro-apoptotic member of the BCL2 protein family) by 7.8% at 24 h, p53 upregulated modulator of apoptosis  
601 (PUMA, mitochondria pro-apoptotic BCL-2 homolog) by 6.1% at 24 h, apoptosis regulator BAX by 24% at 48  
602 h, apoptotic protease activating factor 1 (APAF1) by 10.9% at 48 h, caspase 9 by 14.4% at 12 h, and c-caspase  
603 9 by 15.7% at 24 h, apoptosis inducing factor (AIF) by 10.9% at 48 h, poly [ADP-ribose] polymerase 1

604 (PARP1) by 13.1% at 12 h, and cleaved PARP (c-PARP) by 21.5% at 12 h versus the untreated controls, while  
605 it increased the expression of murine double minute-2 homolog (MDM2, negative regulator of p53) by 8.9% at  
606 12 h and minimally affected the expression of B cell lymphoma 2 (BCL2, anti-apoptotic protein) ( $\leq 5\%$ ) (Figs.  
607 12 C and D).

608

## 609 **Effects of 10 $\mu\text{g}/\text{mL}$ PTX on the expression of FAS-mediated apoptosis** 610 **proteins**

611 RAW 264.7 cells treated with 10  $\mu\text{g}/\text{mL}$  PTX showed increases in the expression of FAS-mediated  
612 apoptosis proteins, that is, FAS ligand (FASL) by 20.5% at 48 h, FAS (CD95) by 10.1% at 12 h,  
613 FAS-associated protein with death domain (FADD) by 15.3% at 12 h, BH3 interacting-domain death agonist  
614 (BID) by 8.5% at 24 h, caspase 3 by 19.2% at 48 h, c-caspase 3 by 16.1% at 48 h, caspase 7 by 24.8% at 48 h,  
615 c-caspase 8 by 14% at 24 h, c-caspase 10 by 21.4% at 24 h versus the untreated controls, while the expression of  
616 FLICE-like inhibitory protein (FLIP) was decreased by 9.3% at 48 h (Figs. 12 E and F).

617

618 **Figure 12.** Expression of downregulated inflammatory proteins (A and B), p53-mediated apoptosis proteins (C  
619 and D), and FAS-mediated apoptosis proteins (E and F) in 10  $\mu\text{g}/\text{mL}$  PTX-treated RAW 264.7 cells as  
620 determined by IP-HPLC. Line graphs, A, C, and E show protein expression on the same scale (%) versus culture  
621 time (12, 24, or 48 h), whereas the star plots (B, D, and F) show the differential expression levels of the proteins  
622 at 12, 24, or 48 h after PTX treatment on the appropriate scales (%). The thick black line, untreated controls  
623 (100%); the blue, yellow, and red dots show differential protein levels after PTX administration for 12, 24, or 48  
624 h, respectively.

625

## 626 **Effects of 10 $\mu\text{g}/\text{mL}$ PTX on the expression of cell protection proteins**

627 10 µg/mL PTX-treated RAW 264.7 cells showed increases in the expression of cellular stress protection-,  
628 antioxidant-, and cell survival proteins versus the untreated controls, as follows: heat shock protein-70 (HSP70)  
629 by 17.2% at 12 h, Cu-Zn superoxide dismutase-1 (SOD1) by 28.2 % at 48 h, glutathione S-transferase  $\omega$  1/2  
630 (GSTO1/2, a detoxifying enzyme) by 30.3% at 48 h, nitric oxide synthases-1 (NOS1) by 6.4% at 12 h,  
631 pAKT1/2/3 by 6.5% at 24 h, PKC by 8.6% at 24 h, p-PKC1 $\alpha$  by 11.5% at 24 h, LC3 $\beta$  by 11.6% at 48 h,  
632 sodium-dependent vitamin C transporter 2 (SVCT2) by 6.6% at 48 h, SP-1 by 8.3% at 48 h, a transcription  
633 factor regulating the expression of antioxidant proteins NRF2 by 4.1% at 24 h, energy expenditure hormone  
634 leptin by 13.1% at 24 h, a stress responsive protein deacetylase sirtuin 6 by 5.8% at 24 h, FOXP3 by 7.4% at  
635 12 h, and PLC- $\beta$ 2 by 13.1% at 48 h versus the untreated controls. Whereas PTX decreased the expression of  
636 cellular maintenance proteins: heme oxygenase-1 (HO1) by 12.1% at 48 h, small heat shock protein HSP-27 by  
637 14.2% at 48 h, HSP-90 $\alpha/\beta$  by 15.8% at 24 h, telomerase reverse transcriptase (TERT) by 10.4% at 12 h, mTOR  
638 by 19.5% at 24 h, SP-3 by 16.4% at 48 h, and peroxisome proliferator-activated receptor gamma coactivator  
639 1-alpha (PGC1 $\alpha$ ) by 12.1% at 24 h, sirtuin 1 by 9% at 24 h, sirtuin 3 by 7.1% at 24 h, and FOXP4 by 11% at  
640 48 h. The expressions of 5' AMP-activated protein kinase  $\alpha$  (AMPK $\alpha$ , an enzyme that regulates cellular energy  
641 homeostasis) and sirtuin 7 were only minimally affected by PTX ( $\leq$  5%) (Figs. 13 A and B).

642

### 643 **Effects of 10 µg/mL PTX on the expression of endoplasmic reticulum stress** 644 **proteins**

645

646 10 µg/mL PTX had different effects on the expression of endoplasmic reticulum stress proteins in RAW  
647 264.7 cells. PTX downregulated the proteins contributing to ER stress signaling; eIF2AK3, (PERK, which  
648 functions as an ER kinase) by 9.3% at 12 h, eIF2 $\alpha$  and p-eIF2 $\alpha$  (essential factors for protein synthesis also

649 responsible for ER stresses) by 8.7% at 12 h and 5.7% at 48 h, respectively, activating transcription factor 6 $\alpha$   
650 (ATF6 $\alpha$ ) by 9% at 12 h, binding immunoglobulin protein (BIP, a HSP70 molecular chaperone) by 8.4% at 12  
651 h, serine/threonine-protein kinase/endoribonuclease inositol-requiring enzyme 1  $\alpha$  (IRE1 $\alpha$ ) by 8.2% at 24 h,  
652 PGC-1 $\alpha$  by 12.1% at 24 h, caveolin-1 by 8.3% at 48 h, and AIF by 10.9% at 48 h compared to the untreated  
653 controls. On the other hand, PTX upregulated the proteins contributing to ER-stress environment in cells;  
654 HSP-70 by 17.2% at 12 h, p-eIF2AK3 by 6.7% at 48 h, ATF4 (cAMP-response element binding protein 2) by  
655 8% at 24 h, AP1M1 (the medium chain of the trans-Golgi network clathrin-associated protein complex AP-1)  
656 by 12.9% at 48 h, calnexin (a chaperone for the protein folding in the membrane of the ER) by 8.5% at 12 h,  
657 LC3 $\beta$  (microtubule-associated proteins 1A/1B light chain 3B contributing to autophagosome biogenesis) by  
658 11.6% at 48 h, and endothelin-1 (inducing Ca<sup>2+</sup> release from ER) by 17.8% at 24 h. The expressions of  
659 GADD153 (C/EBP homologous protein (CHOP)) and p-GADD153 were only minimally affected by PTX ( $\leq$   
660 5%) (Figs. 13 C and D).

661

## 662 **Effects of 10 $\mu$ g/mL PTX on the expression of SHH/PTCH/GLI and** 663 **Notch/Jagged signaling proteins**

664 10  $\mu$ g/mL PTX was found to influence the expression of SHH/PTCH/GLI signaling proteins positively or  
665 negatively in RAW 264.7 cells. PTX upregulated the upstream proteins of SHH/PTCH/GLI signaling; sonic  
666 hedgehog (SHH) by 14.6% at 24 h, patched homolog 1 (PTCH1, the receptor for sonic hedgehog) by 8.8% at  
667 48 h, and CD44 (HCAM, the activator of SHH signaling) by 9.8% at 48 h versus the untreated controls, while  
668 downregulated the downstream proteins of SHH/PTCH/GLI signaling; GLI1 (Glioma-associated oncogene,  
669 the effectors of SHH signaling) by 12.9% at 24 h, EpCAM (epithelial cell adhesion molecule, involved in

670 SHH signaling) by 3.1% at 48 h, and BCL2 (GLI binding site in BCL2 promoter, upregulated by GLI1) by  
671 4.6% at 12 h.

672 On the other hand, PTX downregulated Notch/Jagged signaling proteins; Notch1 (Notch homolog 1,  
673 translocation-associated (*Drosophila*)) by 5.3% at 48 h, Jagged2 (ligand for Notch) by 6.1% at 24 h, and  
674 VEGF-A (crosstalk between VEGF and Notch signaling) by 6.7% at 48 h. The expressions of Notch upstream  
675 signaling proteins, HIF1 $\alpha$  (hypoxia-inducible factors 1 $\alpha$ ) and Wnt1 were compensatory increased by 13% and  
676 13% at 24 h, respectively (Figs. 13 E and F).

677

678 **Figure 13.** Expression of protection proteins (A and B), endoplasmic reticulum stress proteins (C and D), and  
679 SHH/PTCH/GLI and Notch/Jagged signaling in 10  $\mu$ g/mL PTX-treated RAW 264.7 cells as determined by  
680 IP-HPLC. Line graphs, A, C, and E show protein expression on the same scale (%) versus culture time (12, 24,  
681 or 48 h), whereas the star plots (B, D, and F) show the differential expression levels of the proteins at 12, 24, or  
682 48 h after PTX treatment on the appropriate scales (%). The thick black line, untreated controls (100%); the  
683 blue, yellow, and red dots show differential protein levels after PTX administration for 12, 24, or 48 h,  
684 respectively.

685

## 686 **Effects of 10 $\mu$ g/mL PTX on the expression of cytodifferentiation proteins**

687 10  $\mu$ g/mL PTX was found to influence the expression of cytodifferentiation proteins positively or  
688 negatively in RAW 264.7 cells. PTX upregulated some cytodifferentiation proteins, that is,  $\alpha$ -actin by 12% at  
689 24 h, transglutaminase 2 (TGase 2) by 15.3% at 48 h, protein kinase C (PKC, serine/threonine protein kinase,  
690 8.6% at 24 h), p-PKC1 $\alpha$ (11.5% at 24 h), focal adhesion kinase (FAK, 6.3% at 48 h), A-kinase anchoring  
691 proteins 13 (AKAP13, 7.8% at 48 h), calmodulin (CaM, the universal calcium sensor) by 8.2% at 48 h, calnexin  
692 by 8.5% at 12 h, cystatin A (a thiol protease inhibitor) by 6.9% at 12 h, SOX9 (SRY-related HMG-box) by 9.6%

693 at 48 h, AP-1 complex subunit mu-1 (AP1M1, localized at Golgi vesicles for endocytosis and Golgi processing)  
694 by 12.9% at 48 h), phosphoinositide-specific phospholipase C  $\beta$ 2 (PLC $\beta$ 2) by 13.1% at 48 h, E-cadherin by  
695 17.4% at 48 h, and VE-cadherin (vascular endothelial cadherin) by 12.9% at 12 h, while downregulated other  
696 cytodifferentiation proteins, that is, p63 by 9% at 24 h, vimentin by 14.5% at 24 h, TGase 4 by 11% at 24 h,  
697 hexokinases 2 (HK2) by 10.9% at 12 h, Krox-25 by 7.1% at 24 h, DLX2 (homeobox protein from distal-less  
698 (Dll) gene expressed in the head and limbs of the developing fruit fly) by 17.3% at 24 h, laminin  $\alpha$ 5 by 14.2%  
699 at 48 h, pancreatic lipase by 5.4% at 48 h, and prostate-specific antigen (PSA, gamma-seminoprotein or  
700 kallikrein-3 (KLK3)) by 16.9% at 48 h. On the other hand, the expressions of cysteine-rich protein that  
701 participates in cytoskeletal remodeling (CRIP1) by 16.3% at 12 h), TBX22 (T-box transcription factor), and  
702 epithelial cell adhesion molecule (EpCAM) were only minimally affected by PTX ( $\leq$  5%) (Figs. 14 A and B).

703

## 704 **Effects of 10 $\mu$ g/mL PTX on the expression of neuromuscular** 705 **differentiation proteins**

706 10  $\mu$ g/mL PTX was found to have positive influence on the expression of neuromuscular differentiation  
707 proteins in RAW 264.7 cells. PTX upregulated some neuromuscular differentiation proteins, that is, neuron  
708 specific  $\gamma$  enolase (NSE $\gamma$ ) by 13.6% at 24 h, glial fibrillary acidic protein (GFAP) by 9.5% at 12h, myosin  
709 heavy chain 2 (MYH2) by 28.6% at 24 h, desmin by 12.2% at 12h, calmodulin (CaM) by 8.2% at 48 h,  
710 calnexin by 8.5% at 12 h, cystatin A by 6.9% at 12 h, AP-1 complex subunit mu-1 (AP1M1) by 12.9% at 48 h,  
711 focal adhesion kinase (FAK), substrate for tyrosin kinase of Src) by 6.3% at 48 h, SHH by 14.6 at 24 h,  
712  $\beta$ -catenin by 18.5% at 24 h, Wnt1 by 13% at 24 h, TGase 2 by 15.3% at 48 h, and  $\alpha$ -smooth muscle actin  
713 ( $\alpha$ -SMA) by 30.3% at 12 h, while downregulated other neuromuscular differentiation proteins, that is, S-100  
714 by 13.8% at 48 h, unconventional myosin-1a (membrane binding class I myosin), 10.9% at 12 h,

715 neurofibromin 1 (NF1) by 6.3% at 12 h. The expressions of neurokinin 1 receptor (NK1R, substance P  
716 receptor) and cysteine-rich protein 1 (CRIP1) were only minimally affected by PTX ( $\leq 5\%$ ) (Figs. 14 C and D).

717

## 718 **Effects of 10 $\mu\text{g}/\text{mL}$ PTX on the expression of fibrosis proteins**

719 10  $\mu\text{g}/\text{mL}$  PTX was found to decrease the expression of fibrosis-inducing proteins; FGF1 by 5.5% at 12 h,  
720 FGF2 by 10.3% at 12 h, TGF- $\beta$ 1 by 12.5% at 12 h, CTGF by 17.7% at 12 h, collagen 3A1 by 13.7% at 48 h,  
721 collagen 4 by 14.6% at 24 h, collagen 5A by 6.9% at 24 h, laminin  $\alpha$ 5 by 14.2% at 48 h, integrin  $\beta$ 1 by 8.7%  
722 at 12 h, plasminogen activator inhibitor-1 (PAI1) by 8.7% at 12 h,  $\alpha$ 1-antitrypsin by 7% at 24 h, elafin  
723 (peptidase inhibitor 3, elastase-specific protease inhibitor) by 5.2% at 48 h, and also to increase anti-fibrosis  
724 proteins; plasminogen by 15.6% at 48 h, integrin  $\alpha$ 2 by 16% at 24 h, integrin  $\alpha$ 5 by 12.2% at 48 h, and  
725 capillary morphogenesis gene 2 (CMG2) by 13.5% at 12 h. On the other hand, the expression of endothelin-1,  
726 a key role of vascular homeostasis, was reactively upregulated by 17.8% at 24 h. And the expressions of  
727 FGF7 and platelet-derived growth factor A (PDGF-A) were only minimally affected by PTX ( $\leq 5\%$ ) (Figs. 14  
728 E and F).

729

730 **Figure 14.** Expression of cytodifferentiation proteins (A and B), neuromuscular differentiation proteins (C  
731 and D), and fibrosis proteins (E and F) in 10  $\mu\text{g}/\text{mL}$  PTX-treated RAW 264.7 cells as determined by IP-HPLC.  
732 Line graphs, A, C, and E show protein expression on the same scale (%) versus culture time (12, 24, or 48 h),  
733 whereas the star plots (B, D, and F) show the differential expression levels of the proteins at 12, 24, or 48 h after  
734 PTX treatment on the appropriate scales (%). The thick black line, untreated controls (100%); the blue, yellow,  
735 and red dots show differential protein levels after PTX administration for 12, 24, or 48 h, respectively.

736

## 737 **Effects of 10 µg/mL PTX on the expression of oncogenesis proteins**

738 10 µg/mL PTX was found to influence the expression of oncogenesis proteins positively or negatively in  
739 RAW 264.7 cells. PTX decreased the expression of tumor suppressor proteins; breast cancer type 1  
740 susceptibility protein (BRCA1) by 8.4% at 12 h, breast cancer type 2 susceptibility protein (BRCA2) by 18.6%  
741 at 24 h, neurofibromin 1 (NF1, a GTPase-activating protein that negatively regulates RAS/MAPK pathway  
742 activity) by 6.3% at 12 h, ataxia telangiectasia caused by mutations (ATM, a serine/threonine protein kinase  
743 recruited and activated by DNA double-strand breaks) by 13.9% at 24 h, maspin (a mammary serine protease  
744 inhibitor, serpin superfamily) by 9.5% at 24 h, deleted in malignant brain tumors 1 protein (DMBT1, a  
745 glycoprotein that interacts between tumor cells and the immune system) by 18% at 24 h, methyl-CpG-binding  
746 domain protein 4 (MBD4, a DNA repair enzyme that removes mismatched U or T) by 6.7% at 12 h, p53 by  
747 17.5% at 24 h, retinoblastoma protein (Rb1) by 9.8% at 48 h, but increased the expression of PTCH1 (Protein  
748 patched homolog 1, a suppressor of smoothened release, which signals cell proliferation) by 10.1% at 24 h. On  
749 the other hand, PTX increased the expression of oncogenic proteins; carcinoembryonic antigen (CEA) by 9.6%  
750 at 12 h, 14-3-3 θ proteins (a phosphoserine binding protein that regulates Cdc25C) by 10.9% at 48 h, survivin  
751 (a negative regulator of apoptosis) by 11.9% at 48 h, mucin 4 (an anti-adhesive glycoprotein that contributes to  
752 tumor development and metastasis) by 15.6% at 24 h, Yes-associated protein 1 (YAP1, a potent oncogene that  
753 binds to 14-3-3) by 10.3% at 12 h, but decreased the expression of mucin 1 (a glycoprotein with extensive  
754 O-linked glycosylation of its extracellular domain, oncogenic epithelial membrane antigen) by 21.2% at 48 h.  
755 the expression of phosphatase and tensin homolog (PTEN, tumor suppressor protein) and PIM1  
756 (proto-oncogene serine/threonine-protein kinase) were only minimally affected by PTX ( $\leq 5\%$ ) (Figs. 15 A and  
757 B).

758



## 759 **Effects of 10 µg/mL PTX on the expression of angiogenesis proteins**

760 10 µg/mL PTX reduced the expression of major angiogenesis proteins in RAW 264.7 cells; angiogenin  
761 by 5.3% at 12 h, vascular endothelial growth factor A (VEGF-A) by 6.7% at 48 h, VEGF-D by 15.6% at 24 h,  
762 von Willebrand factor (vWF) by 7.7% at 12 h, Fms-related tyrosine kinase 4 (FLT4) by 12.4% at 48 h,  
763 lymphatic vessel endothelial hyaluronan receptor 1 (LYVE1) by 10.9% at 48 h, fibroblast growth factor-2  
764 (FGF2) by 10.3% at 12 h, CD106 (vascular cell adhesion molecule-1 (VCAM-1) by 15.5% at 12 h, matrix  
765 metalloproteinase-2 (MMP2), 14.9% at 24 h, MMP-10 (9.4% at 12 h), plasminogen activator inhibitor-1 (PAI1)  
766 by 8.7% at 12 h, tumor-specific endothelial marker 8 (TEM8) by 12.3% at 12 h, CD54 (intercellular adhesion  
767 molecule 1 (ICAM-1)) by 12.6% at 12 h, and CD56 (neural cell adhesion molecule (NCAM) versus the  
768 untreated controls, while it compensatory elevated the expression of wound healing-related proteins, VEGF-C  
769 [42] by 10.7% at 12 h, VEGFR2 [43] by 15.1% at 24 h, capillary morphogenesis protein 2 (CMG2) [44] by  
770 13.5% at 12 h, plasminogen (cleavage of the serine proteinase plasminogen to form plasmin, proangiogenic  
771 proteinase) by 15.6% at 48 h, endothelin-1 (21-amino acid vasoconstricting peptides) [45] by 17.8% at 24 h,  
772 and CD44 (homing cell adhesion molecule (HCAM)) by 9.8% at 24 h. The expression of PDGF-A and CD31  
773 (platelet endothelial cell adhesion molecule (PECAM-1)) were only minimally affected by PTX ( $\leq 5\%$ ) (Figs.  
774 15 C and D).

775

## 776 **Effects of 10 µg/mL PTX on the expression of osteogenesis proteins**

777 10 µg/mL PTX-treated RAW 264.7 cells showed increase in the expression of osteogenesis proteins, that  
778 is, bone morphogenetic protein-2 (BMP2, 16.6% at 24 h), BMP3 (a negative regulator for bone density by  
779 antagonizing other BMPs) by 7.9% at 24 h, BMP4 by 21.3% at 24 h, BMPR1B (bone morphogenetic protein  
780 receptor type-1B) by 15.6% at 12 h, BMPR2 (bone morphogenetic protein receptor type 2) by 24.4% at 48 h,

781 osteocalcin by 8.2% at 24 h, osteopontin by 18.4% at 48 h, osteonectin by 14.3% at 12 h, mammalian  
782 Runt-related transcription factor 2 (RUNX2, a key transcription factor associated with osteoblast  
783 differentiation) by 21.3% at 24 h, osterix (a zinc finger-containing transcriptional activator for osteoblastic  
784 differentiation) by 13.3% at 48 h, alkaline phosphatase (ALP) by 13.1% at 48 h, osteoprotegerin (OPG) by 16%  
785 at 24 h, versican (abundant in the woven bone matrix) by 16.9% at 24 h, DMP1 by 19% at 24 h, SMAD4 by  
786 14.9% AT 48 H, and activating transcription factor 4 (ATF4) by 8% at 24 h, while decreased the expression  
787 of aggrecan (a large chondroitin sulfate proteoglycan) by 7.4% at 12 h, receptor activator of nuclear factor  
788 kappa-B ligand (RANKL, a binding partner of OPG) by 6.6% at 12 h, TGF- $\beta$ 1 by 12.5% at 12 h, connective  
789 tissue growth factor (CTGF, CCN2, a role in chondrogenesis and angiogenesis) by 17.7% at 12 h, cathepsin K  
790 (a lysosomal cysteine protease involved in bone remodeling and resorption [46]) by 9.2% at 48 h, HSP90 $\alpha/\beta$   
791 (a crucial regulator of vesicular transport of cellular proteins in osteoclasts [47]) by 16.1% at 24 h, and  
792 sclerostin domain-containing protein 1 (SOSTDC1, a bone morphogenetic protein antagonist) by 7% at 24 h  
793 (Figs. 15 E and F).

794

795 **Figure 15.** Expression of oncogenesis proteins (A and B), angiogenesis proteins (C and D), and osteogenesis  
796 proteins (E and F) in 10  $\mu$ g/mL PTX-treated RAW 264.7 cells as determined by IP-HPLC. Line graphs, A, C,  
797 and E show protein expression on the same scale (%) versus culture time (12, 24, or 48 h), whereas the star plots  
798 (B, D, and F) show the differential expression levels of the proteins at 12, 24, or 48 h after PTX treatment on the  
799 appropriate scales (%). The thick black line, untreated controls (100%); the blue, yellow, and red dots show  
800 differential protein levels after PTX administration for 12, 24, or 48 h, respectively.

801

802 **Global protein expressions in 10  $\mu$ g/mL PTX-treated RAW 264.7 cells**

803

804 Fig. 16 presents the global protein expression changes in 150 representative proteins of 21 different  
805 protein signaling pathways as a star plot. 10  $\mu\text{g}/\text{mL}$  PTX was found to affect the expression of proteins in  
806 different signaling pathways of RAW 264.7 cells, and regulated characteristic cellular functions. PTX increased  
807 cell proliferation by upregulating proliferation-activating proteins, Ki-67, PCNA, cyclin D2, and CDK4, and  
808 enhancing proliferation-related pathways; that is, cMyc/MAX/MAD network by upregulating cMyc and  
809 MAX, p53/Rb/E2F by upregulating E2F1 and downregulating p-Rb1, and Wnt/ $\beta$ -catenin signaling by  
810 upregulating Wnt1, APC,  $\beta$ -catenin, TCF1 and by downregulating snail. PTX decreased histone/DNA  
811 methylation by downregulating EZH2, DNMT1, and DMAP1 and upregulating KDM4D, increased histone  
812 acetylation by upregulating PCAF and downregulating HDAC-10, and also enhanced protein translation by  
813 upregulating DOHH, DHS, and eIF5A1.

814 PTX was found to downregulate TGF- $\beta$ 1, TGF- $\beta$ 2, TGF- $\beta$ 3, SMAD2/3, HGF $\alpha$ , Met, but reactively  
815 upregulate SMAD4, while it stimulated RAS signaling by upregulating KRAS, HRAS, pAKT1/2/3, PI3K,  
816 Rab1, ERK1, and pERK1 and by downregulating JAK2, p-JNK1, and MEKK1, and simultaneously elevated  
817 NF $\kappa$ B signaling by upregulating NF $\kappa$ B, GADD45, p38, p-p38, and MDR, and downregulating p-mTOR and  
818 PGC1 $\alpha$ .

819 PTX increased the expression of acute inflammatory proteins (TNF $\alpha$ , IL-1, IL-6, granzyme B, MCP1,  
820 CXCR4, CTLA4, M-CSF, and MMP1), cell-mediated immunity proteins (CD4, CD8, CD80, HLA-DR, and  
821 perforin), and innate immunity proteins (lactoferrin, versican [48], TLR3, and TLR4).

822 PTX diminished p53-mediated apoptosis by downregulating p53, BAD, NOXA, APAF1, caspase 9,  
823 c-caspase 9, and c-PARP in RAW 264.7 cells, whereas it enhanced FAS-mediated apoptosis by upregulating  
824 FAS, FADD, caspase 7, c-caspase 8, c-caspase 10, caspase 3, and c-caspase 3. On the other hand, PTX activated  
825 cell protection by increasing the expression of HSP70, SOD1, GSTO1/2, SVCT2, NRF2, and NOS1 [49], and  
826 stimulated cell survival and homeostasis by upregulating PLC $\beta$ 2, SP1, and downregulating TERT, SIRT1,  
827 SP3, AMPK $\alpha$ , and PGC1 $\alpha$ . Particularly, PTX attenuated ER-stress by downregulating HSP27, IRE1 $\alpha$ ,  
828 eIF2AK3, p-eIF2 $\alpha$ , ATF6 $\alpha$ , p-GADD153, caveolin-1, AIF, BIP, and upregulating LC3 $\beta$ .

829 PTX stimulated SHH/PTCH signaling by upregulating SHH and PTCH1, but reduced the expression of  
830 GLI1, and subsequently attenuated Notch/Jagged signaling by downregulating Notch1 and Jagged2.  
831 PTX-treated RAW 264.7 cells appeared to be differentiated into mature macrophages by upregulation of  $\alpha$ -actin,  
832 VE-cadherin, CaM, TGase 2, PKC, p-PKC1 $\alpha$ , AP1M1, FAK, AND AKAP13, and showed a characteristics of  
833 neuromuscular differentiation by upregulating NSE- $\gamma$ , GFAP, MYH2, and desmin.

834 PTX was found to have anti-fibrosis effect on RAW 264.7 cells by downregulating FGF2, CTGF,  
835 collagen 3A1, laminin  $\alpha$ 5, and  $\alpha$ 1-antitrypsin. And PTX-treated cells showed a state of oncogenic stress by  
836 upregulating surviving, YAP1, CEA, and 14-3-30, and downregulating ATM, BRCA2, MBD4, and DMBT1.

837 PTX affected the expression of angiogenesis proteins in RAW 264.7 cells positively or negatively, that is,  
838 angiogenin, VEGF-A, vWF, and CD106 (VCAM-1) were downregulated by 10  $\mu$ g/mL PTX, while HIF1 $\alpha$ ,  
839 CMG2, VEGF-C, VEGFR2, and p-VEGFR2 were upregulated. On the other hand, PTX consistently  
840 increased the expression of osteogenesis proteins, BMP-2, BMPR1B, osterix, RUNX2, osteocalcin,  
841 osteonectin, versican, and ALP, but decreased RANKL expression (Fig. 16).

842

843 **Figure 16.** Star plot of global protein expression in RAW 264.7 cells treated with 10  $\mu$ g/mL PTX. The  
844 representative proteins (n=150) were selected and their maximum or minimum expression levels (%) were  
845 plotted in a circular manner. 21 major signaling pathways showed different levels of protein expression. 10  
846  $\mu$ g/mL PTX activated the growth factors, epigenetic modification, protein translation, RAS and NF $\kappa$ B  
847 signaling, protection, neuromuscular ad osteoblastic differentiation, acute inflammation associated with innate  
848 immunity and cell-mediated immunity, but inactivated ER stress, fibrosis, and chronic inflammation.  
849 FAS-mediated apoptosis was enhanced contrary to p53-mediated apoptosis. Also noted that the upregulation  
850 of oncogenic proteins and the downregulation of tumor suppressor proteins. Red circle: maximum expression  
851 of upregulated proteins. Blue circle: minimum expression of downregulated proteins

852

## 853 **Comparison between 10 $\mu$ g/mL and 300 $\mu$ g/mL PTX application** 854 **in RWA 264.7 cells**

855

### 856 **Proliferation-related protein expression by 10 $\mu$ g/mL and 300 $\mu$ g/mL PTX**

857 300  $\mu$ g/mL PTX reduced the expression of proliferation-related proteins in RAW 264.7 cells compared  
858 to 10  $\mu$ g/mL PTX, that is, Ki-67 by 8.5% at 48 h, CDK4 by 9.9% at 12 h, cyclin D2 by 16.6% at 12 h, E2F1  
859 by 14.8% at 24 h, cMyc by 6.4% at 12 h, MAX by 5.1% at 12 h, and MAD1 by 8.6% at 48 h, but increased  
860 the expression of p-Rb1 by 2.7% at 24 h. 10  $\mu$ g/mL PTX stimulated the proliferation of RAW 264.7 cells by

861 upregulating Ki-67, CDK4, cyclin D2, E2F1, cMyc, MAX, and downregulating p-Rb1, while 10 µg/mL PTX  
862 showed anti-proliferative effect on RAW 264.7 cells by downregulating Ki-67, cyclin D2, E2F1, and MAX  
863 compared to the untreated controls (Figs. 17 A and B).

864

### 865 **RAS/NFκB signaling protein expression by 10 µg/mL and 300 µg/mL** 866 **PTX**

867 300 µg/mL PTX reduced the expression of RAS/NFκB signaling proteins in RAW 264.7 cells compared  
868 to 10 µg/mL PTX, that is, KRAS by 11.3% at 12 h, pAKT1/2/3 by 11.3% at 12 h, p-ERK1 by 14.7% at 24 h,  
869 NFκB by 15.4% at 24 h, p-p38 by 6.9% at 24 h, GADD153 by 10.8% at 48 h, and p-PKC1α by 5.8% at 24 h.  
870 However, the expression of pAKT1/2/3 and p-PKC1α by 300 µg/mL PTX were increased to 102% at 48h and  
871 106.9% at 12 h, respectively, compared to those by 10 µg/mL PTX. 10 µg/mL PTX enhanced RAS/NFκB  
872 signaling by upregulating KRAS, pAKT1/2/3, p-ERK1, NFκB, p-p38, GADD153, and p-PKC1α compared to  
873 the untreated controls, while 300 µg/mL PTX attenuated RAS/NFκB signaling by downregulating pAKT1/2/3,  
874 p-ERK1, NFκB, p-p38, and GADD153 (Figs. 17 C and D).

875

### 876 **Inflammatory protein expression by 10 µg/mL and 300 µg/mL PTX**

877 300 µg/mL PTX markedly decreased the expression of inflammation-associated proteins in RAW 264.7  
878 cells compared to 10 µg/mL PTX, that is, TNFα by 11% at 12 h, CD4 by 21.8% at 24 h, CD80 by 6.9% at 24  
879 h, M-CSF by 15% at 48 h, CXCR4 by 7.1% at 24 h, MMP1 by 19.3% at 48 h, and lactoferrin by 15.7% at 24  
880 h, but increased the expression of an inflammation suppressor TGF-β1 by 23.5% at 48 h. It was evident 10  
881 µg/mL PTX stimulated the inflammatory reaction of RAW 264.7 cells by upregulating TNFα, IL-6, CD4,  
882 CD80, M-CSF, CXCR4, MMP1, lactoferrin, and downregulating TGF-β1 compared to the untreated controls,

883 while 300  $\mu\text{g/mL}$  PTX showed anti-inflammatory effect on cells by downregulating TNF $\alpha$ , IL-6, CD4,  
884 M-CSF, MMP1, lactoferrin, and upregulating TGF- $\beta$ 1 (Figs. 17 E and F).

885

### 886 **Apoptosis protein expression by 10 $\mu\text{g/mL}$ and 300 $\mu\text{g/mL}$ PTX**

887 300  $\mu\text{g/mL}$  PTX was found to have different effect on the expression of oncogenesis proteins in RAW  
888 264.7 cells from 10  $\mu\text{g/mL}$  PTX. The expressions of tumor suppressor protein p53, anti-apoptotic protein  
889 BCL2, apoptosis trigger FASL, and TGF- $\beta$ 1 by 300  $\mu\text{g/mL}$  PTX were higher by 7.9% at 24 h, 13.3% at 48 h,  
890 5.5% at 24 h, and 23.5% at 48 h, respectively, than those by 10  $\mu\text{g/mL}$  PTX, while the expressions of  
891 FAS-associated protein with death domain (FADD), apoptosis executors c-caspase 8 and c-caspase 3 by 300  
892  $\mu\text{g/mL}$  PTX were lower by 7.3% at 12 h, 9.9% at 24 h, and 13.3% at 48 h, respectively, than those by 10  
893  $\mu\text{g/mL}$  PTX. 10  $\mu\text{g/mL}$  PTX induced significant apoptosis effect on RAW 264.7 cells through FAS-mediated  
894 apoptosis by upregulating FAS, FADD, c-caspase 8, and c-caspase 3 compared to the untreated controls,  
895 while 300  $\mu\text{g/mL}$  PTX slightly reduced the apoptosis effect by downregulating FADD, c-caspase 8, and  
896 c-caspase 3 compared to PTX (Figs. 17 G and H).

897

898 **Figure 17.** IP-HPLC comparison between the protein expression of 10  $\mu\text{g/mL}$  and 300  $\mu\text{g/mL}$  PTX-treated  
899 RAW 264.7 cells. Expression of proliferation-related proteins (A and B), RAS/NF $\kappa$ B signaling proteins (C and  
900 D), inflammatory proteins (E and F), and apoptosis proteins (G and H) as determined by IP-HPLC. Line  
901 graphs, A, C, E, and G show 10  $\mu\text{g/mL}$  PTX-induced protein expressions, whereas B, D, F, H show 300  $\mu\text{g/mL}$   
902 PTX-induced protein expressions on the same scale (%) versus culture time (12, 24, or 48 h).

903

### 904 **ER stress protein expression by 10 $\mu\text{g/mL}$ and 300 $\mu\text{g/mL}$ PTX**

905 300 µg/mL PTX increased the expression of ER stress proteins in RAW 264.7 cells compared to 10  
906 µg/mL PTX, that is, eIF2AK3 (PERK) by 14.9% at 12 h, p-eIF2α by 12.8% at 48 h, ATF6α by 13.7% at 48 h,  
907 BIP by 10.3% at 12 h. and IRE1α by 3.3% at 24 h. And 300 µg/mL PTX minimally affected the expression of  
908 GADD153 (CHOP) compared to 10 µg/mL PTX. It was found that 10 µg/mL PTX reduced ER stress by  
909 downregulating eIF2AK3, p-eIF2α, ATF6α, BIP, and IRE1α, while 100 µg/mL PTX alleviated the reduction  
910 of ER stress by upregulating eIF2AK3, p-eIF2α, ATF6α, and BIP compared to 10 µg/mL PTX, particularly,  
911 the expression of eIF2AK3, p-eIF2α, ATF6α, and BIP were increased by 300 µg/mL PTX to 106% at 48 h,  
912 106.4% at 48 h, 105.8% at 48 h, an 104.4% at 24 h, respectively, versus the untreated controls (Figs. 18 A and  
913 B).

914

### 915 **Fibrosis protein expression by 10 µg/mL and 300 µg/mL PTX**

916 300 µg/mL PTX increased the expression of fibrosis proteins in RAW 264.7 cells compared to 10 µg/mL  
917 PTX, that is, FGF1 by 7.1% at 24 h, FGF2 by 8.3% at 12 h, CTGF by 15.6% at 12 h, collagen 3A1 by 29.1%  
918 at 24 h, laminin α5 by 28% at 48 h, and α1-antitrypsin by 21.6% at 24 h. 10 µg/mL PTX showed potent  
919 anti-fibrosis effect on RAW 264.7 cells by downregulating FGF1, FGF2, CTGF, collagen 3A1 and 5A,  
920 laminin α5, and α1-antitrypsin, while 300 µg/mL PTX showed no anti-fibrosis effect rather increased the  
921 expression of FGF1 (by 6.4% at 48 h), collagen 3A1 (14% at 24 h), collage 5A (4.6% at 24 h), and laminin α5  
922 (9.8% at 48 h) compared to the untreated controls (Figs. 18 C and D).

923

### 924 **Neuromuscular differentiation protein expression by 10 µg/mL and 300** 925 **µg/mL PTX**

926 300 µg/mL PTX decreased the expression of neuromuscular differentiation proteins in RAW 264.7 cells  
927 compared to 10 µg/mL PTX, that is, NSEγ by 7.6% at 48 h, GFAP by 5.2% at 12 h, MYH2 by 18.1% at 24 h,

928 desmin by 8.5% at 24 h, and  $\alpha$ -SMA by 21.5% at 12 h, but the expression of myosin 1a (membrane binding  
929 class I myosin) was increased by 11.3% at 12 h. 10  $\mu$ g/mL PTX induced nerve differentiation by upregulating  
930 NSE $\gamma$  and GFAP, and muscle differentiation by upregulating MYH2 (skeletal muscle heavy chain 2), desmin,  
931 and  $\alpha$ -SMA, while 300  $\mu$ g/mL PTX only slightly increased the expression of NSE $\gamma$ , GFAP, MYH2, desmin  
932 and  $\alpha$ -SMA compared to the untreated controls (Figs. 18 E and F).

933

### 934 **Osteogenesis protein expression by 10 $\mu$ g/mL and 300 $\mu$ g/mL PTX**

935 300  $\mu$ g/mL PTX decreased the expression of osteogenesis proteins in RAW 264.7 cells compared to 10  
936  $\mu$ g/mL PTX, that is, BMP2 by 25.8% at 48 h, RUNX2 by 27.7% at 12 h, osterix by 8.7% at 24 h, osteocalcin  
937 by 5.2% at 24 h, osteopontin by 11.3% at 48 h, and osteonectin by 9.4% at 24 h. However, the expression  
938 ratios of OPG and RANKL, which are essential signaling molecules of RANKL/RANK/OPG system  
939 regulating osteoclast differentiation/activation and calcium release from the skeleton, were increased by 6.6%  
940 and 9.6% at 12 h, respectively. It was found 10  $\mu$ g/mL PTX showed strong osteogenic effect on RAW 264.7  
941 cells by upregulating BMP2, RUNX2, osterix, osteocalcin, osteopontin, osteonectin, and OPG, while 300  
942  $\mu$ g/mL PTX alleviated the osteogenic effect by downregulating RUNX2, BMP2, and osteocalcin compared to  
943 the untreated controls (Figs. 18 G and H).

944

945 **Figure 18.** IP-HPLC comparison between the protein expression of 10  $\mu$ g/mL and 300  $\mu$ g/mL PTX-treated  
946 RAW 264.7 cells. Expression of ER stress proteins (A and B) fibrosis proteins (C and D), neuromuscular  
947 differentiation proteins (E and F) and osteogenesis proteins (G and H) as determined by IP-HPLC. Line  
948 graphs, A, C, E, and G show 10  $\mu$ g/mL PTX-induced protein expressions, whereas B, D, F, H show 300  $\mu$ g/mL  
949 PTX-induced protein expressions on the same scale (%) versus culture time (12, 24, or 48 h).

950



## 951 **Discussion**

952       The pharmacological effect of PTX was frequently investigated in different cell types including RAW  
953 264.7 cells [19-22] and animals [50-53] by using higher dose PTX, 100 – 500 µg/mL, rather than the  
954 therapeutic dose in human (about 10 µg/mL). It was also reported that the low dose PTX, 10, 25, 50 mg/kg,  
955 led to an increase in the expression of caspase 3 and TNF $\alpha$  in the rat hippocampus following  
956 lipopolysaccharide (LPS)-induced inflammation [54]. And the TNF $\alpha$  production by lipopolysaccharide  
957 (LPS)-stimulated human alveolar macrophages was significantly suppressed in the presence of PTX at  
958 concentration of 2 mM and 1 mM (278.3 µg/mL), but not at 0.5 mM, 0.1mM (27.8 µg/mL), and 0.01 mM,  
959 while production of IL-1 $\beta$ , IL-6, and GM-CSF remained unaffected. These data indicate PTX showed  
960 anti-inflammatory effect selectively depending on its concentration [55].

961       In the present study, RAW 264.7 cells, which are originally murine monocytes, were explored for  
962 PTX-induced protein expression changes by administrating with two different doses, 10 µg/mL PTX similar to  
963 the therapeutic dose in human, and 300 µg/mL PTX which was frequently used in cell and animal  
964 experiments. First of all, the 10 µg/mL PTX-induced effect was compared with the 300 µg/mL PTX-induced  
965 effect. However, in clinical application, even the therapeutic dose PTX, about 10 µg/mL, produces diverse  
966 side effects including belching, bloating, stomach discomfort or upset, nausea, vomiting, indigestion, dizziness,  
967 flushing, angina, palpitations, hypersensitivity, itchiness, rash, hives, bleeding, hallucinations, arrhythmias,  
968 and aseptic meningitis [56, 57]. Therefore, it is thought that the low dose 10 µg/mL PTX-induced protein  
969 expression may be more informative to know the real pharmacological effect of PTX in human than the high  
970 dose 300 µg/mL PTX-induced protein expression in cell culture. Therefore, in the present study, 10 µg/mL  
971 PTX-induced effect on cells was more extensively investigated than 300 µg/mL PTX-induced effect.

972 In the global protein expression of RAW 264.7 cells by 10 µg/mL PTX, a competitive  
973 non-selective phosphodiesterase inhibitor which is known to raise intracellular cAMP and activate PKA,  
974 actually enhanced RAS signaling by upregulating AKAP13, pAKT1/2/3, PKC, p-PKC1α, KRAS, and HRAS,  
975 and subsequently activated histone/DNA demethylation and acetylation by upregulating KDMD4 and PCAF,  
976 and downregulating HDAC10, MBD4, DMAP1, DNMT1 and EZH2, and subsequently induced cellular  
977 proliferation by upregulating cMyc/MAX/MAD network proteins, Wnt/β-catenin signaling objective protein  
978 TCF1, proliferation activating proteins Ki-67, PCNA, PLK4, cyclin D2, and cdc25A in this study. On the  
979 other hand, the expression of CDK inhibitors, p14, p15/16, and p21 were compensatory upregulated. The  
980 double IP-HPLC to assess the amount of protein complex containing two different target proteins showed the  
981 increase of cMyc-MAX heterodimer and β-catenin-TCF1 complex which led to cell cycle progression [58],  
982 and the decrease of cMyc-MAD1 heterodimer and CDK4-p27 complex concomitantly. On the other hand, the  
983 double IP-HPLC also revealed the increase of E2F1-Rb1 and CDK4-p21 complexes, which mitigated cell  
984 cycle progression [59].

985 Although the expression of cMyc and MAX were decreased by 10 µg/mL PTX at 12, 24, and 48 h, the  
986 expression of MAD1 was increased in western blot and IP-HPLC, and the double IP-HPLC showed dominant  
987 increase of cMyc-MAX heterodimer and decrease of cMyc-MAD heterodimer versus the untreated controls.  
988 Therefore, it is suggested that cMyc and MAX are competitively utilized to form cMyc-MAX heterodimer  
989 against cMyc-MAD heterodimer at 12, 24, and 48 h after 10 µg/mL PTX treatment, and then the unbound  
990 cMyc and MAX are gradually reduced in amount as detected in western blot (Fig. 5) and IP-HPLC. And more,  
991 although the expression of E2F1 was increased by 10 µg/mL PTX at 12, 24, and 48 h, the phosphorylated Rb1  
992 (p-Rb1) was decreased, and both E2F1-Rb1 and CDK4-p21 complexes were increased in double IP-HPLC.

993 Therefore, it is suggested p53/Rb/E2F signaling rarely exerts to enhance cell proliferation in 10  $\mu\text{g}/\text{mL}$

994 PTX-treated RAW 264.7 cells.

995 Cell counting assay of 10  $\mu\text{g}/\text{mL}$  PTX-treated cells showed the increase of cell number at 12, 24, and 48

996 h. And regarding some proliferation-related proteins, ICC revealed strong positive reaction of Ki-67 at 12, 24,

997 and 48 h compared to the untreated controls, and western blot showed strong bands of Ki-67, E2F1, Wnt1,

998 and TCF1 at 12, 24, and 48 h. Taken together, it is evident that 10  $\mu\text{g}/\text{mL}$  PTX enhances RAS signaling, and

999 subsequently activates histone/DNA demethylation and acetylation, cMyc/MAX/MAD network, and

1000 Wnt/ $\beta$ -catenin signaling, and resulted in the proliferation of RAW 264.7 cells. Whereas 300  $\mu\text{g}/\text{mL}$  PTX

1001 showed a trend to decrease the expression of proliferation-related proteins, Ki-67, cMyx, MAX, p-Rb1, E2F1,

1002 and cyclin D2 compared to 10  $\mu\text{g}/\text{mL}$  PTX.

1003 The non-selective phosphodiesterase inhibitor, PTX specifically induced RAS signaling, and

1004 subsequently stimulated NF $\kappa$ B signal by upregulating PKC, p-PKC-1 $\alpha$ , AKAP13, MDR, GADD45, p38, and

1005 p-p38, and eventually influenced on the expression of protection-, ER stress-, apoptosis-, and inflammatory

1006 proteins in RAW 264.7 cells. Regarding cellular protection, 10  $\mu\text{g}/\text{mL}$  PTX upregulated antioxidant proteins,

1007 SOD1, GSTO1/2, and SVCT2, but downregulated NRF2 regulating antioxidant expression, PGC-1 $\alpha$

1008 regulating mitochondrial biogenesis, and AMPK1 $\alpha$  that plays a role in cellular energy homeostasis. And 10

1009  $\mu\text{g}/\text{mL}$  PTX mitigated ER stress by downregulating eIF2AK3, p-eIF2AK3, eIF2 $\alpha$ , p-eIF2 $\alpha$ , GADD153,

1010 p-GADD153, BIP, IRE1 $\alpha$ , and ATF6 $\alpha$ . Therefore, it is suggested that 10  $\mu\text{g}/\text{mL}$  PTX-treated in RAW 264.7

1011 cells are relatively safe under control of cellular protection and homeostasis. And more, the 10  $\mu\text{g}/\text{mL}$

1012 PTX-induced RAS signal by cAMP accumulation activated epigenetic modification through histone/DNA

1013 demethylation or acetylation, and subsequently elevated protein translation, which eventually positively

1014 influenced on cell proliferation, differentiation, protection and survival of RAW 264.7 cells.

1015 10 µg/mL PTX-induced NFκB signal also influenced on the expression of inflammatory protein  
1016 positively or negatively in RAW 264.7 cells. It was found some acute inflammatory proteins (TNFα, IL-1,  
1017 IL-6, MCP1, CXCR4, granzyme B, and MMP1), innate immunity proteins (β-defensin 1, lactoferrin, versican,  
1018 TLR 3 and 4), and cell-mediated immunity proteins (CD4, CD8, CD80, HLA-DR, perforin, and CTLA4)  
1019 were upregulated, while some chronic inflammatory proteins including IL-12, CD68, CD106, lysozyme,  
1020 cathepsin C and G, COX2, and α1-antitrypsin were downregulated. Therefore, it is suggested 10 µg/mL  
1021 PTX-treated cells are tend to differentiate into M1 type macrophages, which are pro-inflammatory type and  
1022 important for phagocytosis and secretion of pro-inflammatory cytokines and microbicidal molecules to  
1023 defend against pathogens, such as bacteria, virus [60-62], etc. This activation of M1 type macrophage  
1024 polarization after 10 µg/mL PTX treatment was correlated with the increase of FAS-mediated apoptosis  
1025 contrary to p53-mediated apoptosis in RAW 264.7 cells.

1026 On the other hand, 300 µg/mL PTX consistently decreased the expression of inflammatory proteins,  
1027 TNFα, IL-6, CD4, CD80, M-CSF, CXCR4, MMP1, and lactoferrin but compensatory increased the  
1028 expression of anti-inflammatory protein TGF-β1 compared to 10 µg/mL PTX. And 300 µg/mL PTX increased  
1029 the expression of anti-apoptosis protein, BCL2, but minimally affected the expression of tumor suppressor  
1030 protein, p53, compared to 10 µg/mL PTX, whereas the apoptosis triggering TNF family protein, FASL, and  
1031 the initiator caspase, c-caspase 8 were more upregulated by 300 µg/mL PTX than 10 µg/mL PTX. Therefore,  
1032 it is suggested 300 µg/mL PTX-treated cells showed anti-inflammatory effect and FAS-mediated apoptosis.

1033 The 10 µg/mL PTX-treated RAW 264.7 cells showed crosstalk between activated RAS and NFκB  
1034 signalings, and were progressed into cytodifferentiation by upregulating some growth factors and SHH/PTCH  
1035 signaling. Particularly, it is evident that the 10 µg/mL PTX-treated RAW 264.7 cells have potentials of  
1036 neuromuscular and osteoblastic differentiation, which are able to influence on objective adjacent cells [63-65].

1037 The active neuromuscular and osteoblastic differentiations were also observed in ICC and western blot in this  
1038 study. On the other hand, regarding the expression of osteogenesis proteins, 300 µg/mL PTX downregulated  
1039 the osteoblastic differentiation proteins, BMP2, RUNX2, osterix, osteocalcin, osteopontin, and osteonectin,  
1040 but upregulated the osteoclastic differentiation protein, RANKL, and compensatory increased the expression  
1041 of OPG compared to 10 µg/mL PTX.

1042 In the present study, 300 µg/mL PTX consistently decreased the expression of proliferation-, RAS/NFκB  
1043 signaling-, inflammation-, and osteogenesis proteins but apoptosis proteins compared to 10 µg/mL PTX,  
1044 therefore, it is thought that the high dose 300 µg/mL PTX may somehow disturb the protein expressions and  
1045 give a harmful effect on RAW 264.7 cells, and resulted in the increase of FAS-mediated apoptosis, whereas  
1046 the low dose 10 µg/mL PTX showed characteristic protein expression of competitive  
1047 non-selective phosphodiesterase inhibitor, which may be helpful for the investigation of PTX pharmacological  
1048 effect in human.

1049 Contrary to the neuromuscular and osteoblastic differentiation in PTX-treated RAW 264.7 cells, 10  
1050 µg/mL PTX suppressed fibroblastic differentiation and attenuated collagen production by downregulating the  
1051 fibrosis-inducing proteins, FGF1, FGF2, TGF-β1, CTGF, collagen 3A1, 4, and 5, laminin α5, integrin β1,  
1052 α1-antitrypsin, and upregulating the fibrosis-inhibiting proteins, plasminogen, CMG2, integrin α2 and α5. On  
1053 the other hand, 10 µg/mL PTX increased the expression of endothelin-1 having a key role of vascular  
1054 homeostasis. In the global expression of 10 µg/mL PTX-treated RAW 264.7 cells, the anti-fibrotic protein  
1055 expression is closely relevant to the reduction of chronic inflammation-associated M2 macrophage  
1056 polarization by downregulating CD68, CD106, lysozyme, MMP9, and α1-antitrypsin, and the low level of  
1057 ROS damage and ER stress after 10 µg/mL PTX treatment. Therefore, it is suggested that 10 µg/mL PTX  
1058 inhibits M2 type macrophage polarization through RAS/NFκB/TNFα signaling [66], and reduces ER stress

1059 through eIF2 $\alpha$ /eIF2AK3/GADD153/ATF6 signaling, which negatively regulates the growth factors, TGF- $\beta$ 1,  
1060  $\beta$ 2,  $\beta$ 3, FGF1, FGF2, and CTGF, and extracellular matrix-associated proteins, collagen-3A1, -4, -5A, laminin  
1061  $\alpha$ 5, integrin  $\beta$ 1, plasminogen, PAI-1,  $\alpha$ 1-antitrypsin, and elafin, and eventually resulted in anti-fibrotic effect  
1062 on RAW 264.7 cells.

1063 10  $\mu$ g/mL PTX reduced the expression of many angiogenic proteins, angiogenin, VEGF-A, VEGF-D,  
1064 vWF, FLT-4, LYVE-1, FGF-2, CD1056 (VCAM-1), MMP-2, MMP-10, PAI-1, CD54, and CD56, but  
1065 upregulated some angiogenic proteins responsible for wound and damage, that is, HIF-1 $\alpha$ , VEGF-C, VEGFR2,  
1066 CMG2, plasminogen, endothelin-1, and CD44. These results indicate 10  $\mu$ g/mL PTX primarily inhibited  
1067 angiogenesis but secondarily maintained *de novo* angiogenesis for wound healing [67].

1068 In addition, 10  $\mu$ g/mL PTX was found to increase the potential of oncogenesis by upregulating the  
1069 oncogenic proteins, CEA, 14-3-3 $\theta$ , survivin, mucin 4, and YAP1, and downregulating the tumor suppressor  
1070 proteins, P53, Rb1, BRCA1, BRCA2, NF1, ATM, maspin, and DMBT1. Nevertheless, 10  $\mu$ g/mL PTX did not  
1071 increase the expression of DNA repair enzymes, MBD4 and PARP-1, and exogenous stress responsible  
1072 proteins, JNK1 and JAK2, but showed the overexpression of antioxidant proteins, SOD1 and GSTO1/2, and  
1073 cell protection proteins, HSP70, sirtuin 6, and leptin, and resulted in the attenuation of ER stress. Therefore, it  
1074 is suggested that 10  $\mu$ g/mL PTX does not exert oncogenesis in RAW 264.7 cells, but maintains the cellular  
1075 homeostasis, even though there appears slight elevation of oncogenic protein expression.

1076 The 10  $\mu$ g/mL PTX-induced protein expression changes of different signaling pathways were  
1077 summarized in a diagram of Fig. 19. The protein signaling diagram illustrated main axes of protein signaling  
1078 pathways in cells based on IP-HPLC data obtained in this study, therefore, it may indicate the real status of  
1079 pharmacological effect of PTX in RAW 264.7 cells. We thought this PTX-induced protein expression changes

1080 of different signaling pathways should be corrected or added by further precise protein expression

1081 investigation using different cells and animals.

1082

1083 **Figure 16.** A diagram of 10 µg/mL PTX-induced protein expression change in global protein signaling  
1084 pathways of RAW 264.7 cells. The main axis of cellular signaling, that is, proliferation, RAS signaling, NFκB  
1085 signaling, and inflammation were consistently activated by 10 µg/mL PTX, followed by activation of  
1086 epigenetic modification, protein translation, Wnt/β-catenin, cMyc/MAX/MAD network, neuromuscular and  
1087 osteoblastic differentiation, acute inflammation, innate immunity, cell-mediated immunity, and FAS-mediated  
1088 apoptosis, while inactivation of p53/Rb/E2F signaling, ER stress, angiogenesis, fibrosis, and chronic  
1089 inflammation. Red letter: upregulated signaling and proteins. Blue letter: downregulated signaling and  
1090 proteins.

1091

## 1092 **Conclusions**

1093 PTX as a non-selective phosphodiesterase inhibitor showed different biological effect on RAW 264.7  
1094 cells depending on the concentration of low dose 10 µg/mL or high dose 300 µg/mL PTX. 10 µg/mL PTX  
1095 enhanced a central protein expression pathways, RAS signaling, and subsequently induced proliferation,  
1096 epigenetic activation, neuromuscular and osteoblastic differentiation, and stimulated acute inflammation,  
1097 innate immunity, and cell mediated immunity, while reduced chronic inflammation, ER stress, and fibrosis  
1098 but reactively increased FAS-mediated apoptosis and oncogenic potential in RAW 264.7 cells. On the other  
1099 hand, 300 µg/mL PTX was found to decrease RAS/NFκB signaling compared to 10 µg/mL PTX, and  
1100 subsequently attenuated proliferation, epigenetic activation, inflammation, neuromuscular and osteoblastic  
1101 differentiation but increased apoptosis and fibrosis.

1102

1103

1104

## 1105 **Acknowledgments**

1106 We express our gratitude to the late Professor Je Geun Chi who encouraged us to perform IP-HPLC, and  
1107 to the late Dr. Soo Il Chung who taught us the biological usefulness of IP-HPLC.

1108

## 1109 **Conflicts of Interest**

1110 The authors declare no conflict of interest.

1111

## 1112 **Author Contributions**

1113 M.H. Seo contributed to the conception and design of the study, data acquisition, analysis and  
1114 interpretation and drafted and critically revised the manuscript: D.W. Kim and Y.S. Kim contributed to the  
1115 data acquisition, analysis and interpretation: S.K. Lee contributed to the study design and interpretation and  
1116 critically reviewed the manuscript. All authors approved the manuscript and agreed to be accountable for all  
1117 aspects of the work.

1118

## 1119 **References**

- 1120 1. Angelides NS. Continuous infusion treatment with pentoxifylline in patients with severe peripheral  
1121 vascular occlusive disease. *Angiology*. 1986;37(8):555-64. <http://www.ncbi.nlm.nih.gov/pubmed/3740545> Epub  
1122 1986/08/01.
- 1123 2. Roekaerts F, Deleers L. Trental 400 in the treatment of intermittent claudication: results of long-term,  
1124 placebo-controlled administration. *Angiology*. 1984;35(7):396-406.  
1125 <http://www.ncbi.nlm.nih.gov/pubmed/6380348> Epub 1984/07/01.
- 1126 3. Arcaro CA, Assis RP, Zanon NM, Paula-Gomes S, Navegantes LCC, Kettelhut IC, et al. Involvement of  
1127 cAMP/EPAC/Akt signaling in the antiproteolytic effects of pentoxifylline on skeletal muscles of diabetic rats. *J*  
1128 *Appl Physiol* (1985). 2018;124(3):704-16. <http://www.ncbi.nlm.nih.gov/pubmed/29357512> Epub 2018/01/24.
- 1129 4. Lin SL, Chen RH, Chen YM, Chiang WC, Tsai TJ, Hsieh BS. Pentoxifylline inhibits platelet-derived  
1130 growth factor-stimulated cyclin D1 expression in mesangial cells by blocking Akt membrane translocation.  
1131 *Molecular pharmacology*. 2003;64(4):811-22. <http://www.ncbi.nlm.nih.gov/pubmed/14500737> Epub 2003/09/23.



- 1132 5. Luo M, Dong L, Li J, Wang Y, Shang B. Protective effects of pentoxifylline on acute liver injury induced  
1133 by thioacetamide in rats. *International journal of clinical and experimental pathology*. 2015;8(8):8990-6.  
1134 <http://www.ncbi.nlm.nih.gov/pubmed/26464641> Epub 2015/10/16.
- 1135 6. Speer EM, Dowling DJ, Ozog LS, Xu J, Yang J, Kennady G, et al. Pentoxifylline inhibits TLR- and  
1136 inflammasome-mediated in vitro inflammatory cytokine production in human blood with greater efficacy and  
1137 potency in newborns. *Pediatric research*. 2017;81(5):806-16. <http://www.ncbi.nlm.nih.gov/pubmed/28072760>  
1138 Epub 2017/01/11.
- 1139 7. Speer EM, Dowling DJ, Xu J, Ozog LS, Mathew JA, Chander A, et al. Pentoxifylline, dexamethasone and  
1140 azithromycin demonstrate distinct age-dependent and synergistic inhibition of TLR- and  
1141 inflammasome-mediated cytokine production in human newborn and adult blood in vitro. *PloS one*.  
1142 2018;13(5):e0196352. <http://www.ncbi.nlm.nih.gov/pubmed/29715306> Epub 2018/05/02.
- 1143 8. Zhang J, Tao X, Xie J, Xiang M, Fu W. Prophylactic anti-inflammation inhibits cigarette smoke-induced  
1144 emphysema in guinea pigs. *Journal of Huazhong University of Science and Technology Medical sciences =*  
1145 *Hua zhong ke ji da xue xue bao Yi xue Ying De wen ban = Huazhong keji daxue xuebao Yixue Yingdewen ban*.  
1146 2003;23(4):365-8. <http://www.ncbi.nlm.nih.gov/pubmed/15015637> Epub 2004/03/16.
- 1147 9. Lee JG, Shim S, Kim MJ, Myung JK, Jang WS, Bae CH, et al. Pentoxifylline Regulates Plasminogen  
1148 Activator Inhibitor-1 Expression and Protein Kinase A Phosphorylation in Radiation-Induced Lung Fibrosis.  
1149 *BioMed research international*. 2017;2017:1279280. <http://www.ncbi.nlm.nih.gov/pubmed/28337441> Epub  
1150 2017/03/25.
- 1151 10. Kaidar-Person O, Marks LB, Jones EL. Pentoxifylline and vitamin E for treatment or prevention of  
1152 radiation-induced fibrosis in patients with breast cancer. *The breast journal*. 2018;24(5):816-9.  
1153 <http://www.ncbi.nlm.nih.gov/pubmed/29687536> Epub 2018/04/25.
- 1154 11. Chiao TB, Lee AJ. Role of pentoxifylline and vitamin E in attenuation of radiation-induced fibrosis. *The*  
1155 *Annals of pharmacotherapy*. 2005;39(3):516-22. <http://www.ncbi.nlm.nih.gov/pubmed/15701781> Epub  
1156 2005/02/11.
- 1157 12. Yalcin-Ulker GM, Cumbul A, Duygu-Capar G, Uslu U, Sencift K. Preventive Effect of Phosphodiesterase  
1158 Inhibitor Pentoxifylline Against Medication-Related Osteonecrosis of the Jaw: An Animal Study. *Journal of*  
1159 *oral and maxillofacial surgery : official journal of the American Association of Oral and Maxillofacial Surgeons*.  
1160 2017;75(11):2354-68. <http://www.ncbi.nlm.nih.gov/pubmed/28529150> Epub 2017/05/23.
- 1161 13. Kim JH, Shin BC, Park WS, Lee J, Kuh HJ. Antifibrotic effects of pentoxifylline improve the efficacy of  
1162 gemcitabine in human pancreatic tumor xenografts. *Cancer science*. 2017;108(12):2470-7.  
1163 <http://www.ncbi.nlm.nih.gov/pubmed/28940685> Epub 2017/09/25.
- 1164 14. Nidhyananandan S, Thippeswamy BS, Chandrasekhar KB, Reddy ND, Kulkarni NM, Karthikeyan K, et al.  
1165 Enhanced anticancer efficacy of histone deacetyl inhibitor, suberoylanilide hydroxamic acid, in combination  
1166 with a phosphodiesterase inhibitor, pentoxifylline, in human cancer cell lines and in-vivo tumor xenografts.  
1167 *Anti-cancer drugs*. 2017;28(9):1002-17. <http://www.ncbi.nlm.nih.gov/pubmed/28727579> Epub 2017/07/21.
- 1168 15. Golunski G, Woziwodzka A, Piosik J. Potential Use of Pentoxifylline in Cancer Therapy. *Current*  
1169 *pharmaceutical biotechnology*. 2018;19(3):206-16. <http://www.ncbi.nlm.nih.gov/pubmed/29804530> Epub  
1170 2018/05/29.
- 1171 16. Napolitano R, De Matteis S, Lucchesi A, Carloni S, Cangini D, Musuraca G, et al. Pentoxifylline-Induced  
1172 Apoptosis in Chronic Lymphocytic Leukemia: New Insights into Molecular Mechanism. *Mini reviews in*  
1173 *medicinal chemistry*. 2018;18(3):287-94. <http://www.ncbi.nlm.nih.gov/pubmed/28969553> Epub 2017/10/04.
- 1174 17. Smith RV, Waller ES, Doluisio JT, Bauza MT, Puri SK, Ho I, et al. Pharmacokinetics of orally administered  
1175 pentoxifylline in humans. *Journal of pharmaceutical sciences*. 1986;75(1):47-52.

- 1176 <http://www.ncbi.nlm.nih.gov/pubmed/3958905> Epub 1986/01/01.
- 1177 18. V. SR, S. WE, Doluisio JT, Bauza MT, Puri SK, Ho I, et al. Pharmacokinetics of orally administered
- 1178 pentoxifylline in humans. *Journal of pharmaceutical sciences*. 1986;75(1):47-52.
- 1179 19. Strutz F, Heeg M, Kochsiek T, Siemers G, Zeisberg M, Muller GA. Effects of pentoxifylline, pentifylline
- 1180 and gamma-interferon on proliferation, differentiation, and matrix synthesis of human renal fibroblasts.
- 1181 *Nephrology, dialysis, transplantation : official publication of the European Dialysis and Transplant*
- 1182 *Association - European Renal Association*. 2000;15(10):1535-46.
- 1183 <http://www.ncbi.nlm.nih.gov/pubmed/11007820> Epub 2000/09/29.
- 1184 20. Chao CC, Hu S, Close K, Choi CS, Molitor TW, Novick WJ, et al. Cytokine release from microglia:
- 1185 differential inhibition by pentoxifylline and dexamethasone. *The Journal of infectious diseases*.
- 1186 1992;166(4):847-53. <http://www.ncbi.nlm.nih.gov/pubmed/1527422> Epub 1992/10/01.
- 1187 21. Ruan D, Deng S, Liu Z, He J. Pentoxifylline Can Reduce the Inflammation Caused by LPS after Inhibiting
- 1188 Autophagy in RAW264.7 Macrophage Cells. *BioMed research international*. 2021;2021:6698366.
- 1189 <http://www.ncbi.nlm.nih.gov/pubmed/33816630>.
- 1190 22. Endres S, Fulle HJ, Sinha B, Stoll D, Dinarello CA, Gerzer R, et al. Cyclic nucleotides differentially
- 1191 regulate the synthesis of tumour necrosis factor-alpha and interleukin-1 beta by human mononuclear cells.
- 1192 *Immunology*. 1991;72(1):56-60. <http://www.ncbi.nlm.nih.gov/pubmed/1847694> Epub 1991/01/01.
- 1193 23. Kim YS, Lee SK. High Performance Liquid Chromatography Analysis of Human Salivary Protein
- 1194 Complexes. *Kor J Oral Maxillofac Pathol*. 2014;36(381-388).
- 1195 24. Kim YS, Lee SK. IP-HPLC Analysis of Human Salivary Protein Complexes. *Korean Journal of Oral and*
- 1196 *Maxillofacial Pathology*. 2015;39(2):615-22.
- 1197 25. Kim SM, Eo MY, Cho YJ, Kim YS, Lee SK. Immunoprecipitation high performance liquid
- 1198 chromatographic analysis of healing process in chronic suppurative osteomyelitis of the jaw. *Journal of*
- 1199 *cranio-maxillo-facial surgery : official publication of the European Association for Cranio-Maxillo-Facial*
- 1200 *Surgery*. 2018;46(1):119-27. <http://www.ncbi.nlm.nih.gov/pubmed/29191501> Epub 2017/12/02.
- 1201 26. Kim SM, Eo MY, Cho YJ, Kim YS, Lee SK. Wound healing protein profiles in the postoperative exudate of
- 1202 bisphosphonate-related osteonecrosis of mandible. *Eur Arch Otorhinolaryngol*. 2017.
- 1203 <http://www.ncbi.nlm.nih.gov/pubmed/28647850> Epub 2017/06/26.
- 1204 27. Kim SM, Eo MY, Cho YJ, Kim YS, Lee SK. Differential protein expression in the secretory fluids of
- 1205 maxillary sinusitis and maxillary retention cyst. *Eur Arch Otorhinolaryngol*. 2017;274(1):215-22.
- 1206 <http://www.ncbi.nlm.nih.gov/pubmed/27422628> Epub 2016/07/17.
- 1207 28. Seo MH, Myoung H, Lee JH, Kim SM, Lee SK. Changes in oncogenic protein levels in peri-implant oral
- 1208 malignancy: a case report. *Maxillofacial plastic and reconstructive surgery*. 2019;41(1):46.
- 1209 <http://www.ncbi.nlm.nih.gov/pubmed/31763327>.
- 1210 29. Kim SM, Jeong D, Kim MK, Lee SS, Lee SK. Two different protein expression profiles of oral squamous
- 1211 cell carcinoma analyzed by immunoprecipitation high-performance liquid chromatography. *World journal of*
- 1212 *surgical oncology*. 2017;15(1):151. <http://www.ncbi.nlm.nih.gov/pubmed/28789700> Epub 2017/08/10.
- 1213 30. Yoon CS, Kim MK, Kim YS, Lee SK. In vivo protein expression changes in mouse livers treated with
- 1214 dialyzed coffee extract as determined by IP-HPLC. *Maxillofacial plastic and reconstructive surgery*.
- 1215 2018;40(1):44. <http://www.ncbi.nlm.nih.gov/pubmed/30613574>.
- 1216 31. Yoon CS, Kim MK, Kim YS, Lee SK. In vitro protein expression changes in RAW 264.7 cells and HUVECs
- 1217 treated with dialyzed coffee extract by immunoprecipitation high performance liquid chromatography.
- 1218 *Scientific reports*. 2018;8(1):13841. <http://www.ncbi.nlm.nih.gov/pubmed/30218035>.
- 1219 32. Kim MK, Kim SG, Lee SK. 4-Hexylresorcinol-induced angiogenesis potential in human endothelial cells.

- 1220 Maxillofacial plastic and reconstructive surgery. 2020;42(1):23.  
1221 <http://www.ncbi.nlm.nih.gov/pubmed/32642459>.
- 1222 33. Kim MK, Yoon CS, Kim SG, Park YW, Lee SS, Lee SK. Effects of 4-Hexylresorcinol on Protein Expressions  
1223 in RAW 264.7 Cells as Determined by Immunoprecipitation High Performance Liquid Chromatography.  
1224 Scientific reports. 2019;9(1):3379. <http://www.ncbi.nlm.nih.gov/pubmed/30833641>.
- 1225 34. Kim YS. Preliminary study on hydrogen peroxide-induced cellular responses in RAW 264.7 cells as  
1226 determined by IP-HPLC. Korean Journal of Maxillofacial Pathology. 2019;43(6):255-67.
- 1227 35. Lee IS, Kim DW, Oh JH, Lee SK, Choi JY, Kim SG, et al. Effects of 4-Hexylresorcinol on Craniofacial  
1228 Growth in Rats. International journal of molecular sciences. 2021;22(16).  
1229 <http://www.ncbi.nlm.nih.gov/pubmed/34445640>.
- 1230 36. Taciak B, Bialasek M, Braniewska A, Sas Z, Sawicka P, Kiraga L, et al. Evaluation of phenotypic and  
1231 functional stability of RAW 264.7 cell line through serial passages. PloS one. 2018;13(6):e0198943.  
1232 <http://www.ncbi.nlm.nih.gov/pubmed/29889899>.
- 1233 37. Park MH, Wolff EC. Hypusine, a polyamine-derived amino acid critical for eukaryotic translation. The  
1234 Journal of biological chemistry. 2018;293(48):18710-8. <http://www.ncbi.nlm.nih.gov/pubmed/30257869>.
- 1235 38. Chung SI. Comparative studies on tissue transglutaminase and factor XIII. Annals of the New York  
1236 Academy of Sciences. 1972;202:240-55. <http://www.ncbi.nlm.nih.gov/pubmed/4629552>.
- 1237 39. Chung SI, Shrager RI, Folk JE. Mechanism of action of guinea pig liver transglutaminase. VII. Chemical  
1238 and stereochemical aspects of substrate binding and catalysis. The Journal of biological chemistry.  
1239 1970;245(23):6424-35. <http://www.ncbi.nlm.nih.gov/pubmed/5488783>.
- 1240 40. Lee SS, Kim SM, Kim YS, Lee SK. Extensive protein expression changes induced by pamidronate in RAW  
1241 264.7 cells as determined by IP-HPLC. PeerJ. 2020;8:e9202. <http://www.ncbi.nlm.nih.gov/pubmed/32509464>.
- 1242 41. Kim YS, Kim DW, Kim SG, Lee SK. 4-hexylresorcinol-induced protein expression changes in human  
1243 umbilical cord vein endothelial cells as determined by immunoprecipitation high-performance liquid  
1244 chromatography. PloS one. 2020;15(12):e0243975. <http://www.ncbi.nlm.nih.gov/pubmed/33320912>.
- 1245 42. Saaristo A, Tammela T, Farkkila A, Karkkainen M, Suominen E, Yla-Herttuala S, et al. Vascular  
1246 endothelial growth factor-C accelerates diabetic wound healing. The American journal of pathology.  
1247 2006;169(3):1080-7. <http://www.ncbi.nlm.nih.gov/pubmed/16936280>.
- 1248 43. Zhang N, Fang Z, Contag PR, Purchio AF, West DB. Tracking angiogenesis induced by skin wounding  
1249 and contact hypersensitivity using a Vegfr2-luciferase transgenic mouse. Blood. 2004;103(2):617-26.  
1250 <http://www.ncbi.nlm.nih.gov/pubmed/14512298>.
- 1251 44. Sergeeva OA, van der Goot FG. Converging physiological roles of the anthrax toxin receptors.  
1252 F1000Research. 2019;8. <http://www.ncbi.nlm.nih.gov/pubmed/31448094>.
- 1253 45. Shao R, Yan W, Rockey DC. Regulation of endothelin-1 synthesis by endothelin-converting enzyme-1  
1254 during wound healing. The Journal of biological chemistry. 1999;274(5):3228-34.  
1255 <http://www.ncbi.nlm.nih.gov/pubmed/9915864>.
- 1256 46. Toriu N, Ueno T, Mizuno H, Sekine A, Hayami N, Hiramatsu R, et al. Brown tumor diagnosed three  
1257 years after parathyroidectomy in a patient with nail-patella syndrome: A case report. Bone reports.  
1258 2019;10:100187. <http://www.ncbi.nlm.nih.gov/pubmed/30627596>.
- 1259 47. Price JT, Quinn JM, Sims NA, Vieusseux J, Waldeck K, Docherty SE, et al. The heat shock protein 90  
1260 inhibitor, 17-allylamino-17-demethoxygeldanamycin, enhances osteoclast formation and potentiates bone  
1261 metastasis of a human breast cancer cell line. Cancer research. 2005;65(11):4929-38.  
1262 <http://www.ncbi.nlm.nih.gov/pubmed/15930315>.
- 1263 48. Chang MY, Kang I, Gale M, Jr., Manicone AM, Kinsella MG, Braun KR, et al. Versican is produced by

- 1264 Trif- and type I interferon-dependent signaling in macrophages and contributes to fine control of innate  
1265 immunity in lungs. *American journal of physiology Lung cellular and molecular physiology*.  
1266 2017;313(6):L1069-L86. <http://www.ncbi.nlm.nih.gov/pubmed/28912382>.
- 1267 49. Zhu L, Li L, Zhang Q, Yang X, Zou Z, Hao B, et al. NOS1 S-nitrosylates PTEN and inhibits autophagy in  
1268 nasopharyngeal carcinoma cells. *Cell death discovery*. 2017;3:17011.  
1269 <http://www.ncbi.nlm.nih.gov/pubmed/28243469>.
- 1270 50. Dhulqarnain AO, Takzaree N, Hassanzadeh G, Tooli H, Malekzadeh M, Khanmohammadi N, et al.  
1271 Pentoxifylline improves the survival of spermatogenic cells via oxidative stress suppression and upregulation  
1272 of PI3K/AKT pathway in mouse model of testicular torsion-detorsion. *Heliyon*. 2021;7(4):e06868.  
1273 <http://www.ncbi.nlm.nih.gov/pubmed/33997400>.
- 1274 51. Yang YL, Lee MG, Lee CC, Su PI, Chi CY, Liu CH, et al. Pentoxifylline decreases post-operative  
1275 intra-abdominal adhesion formation in an animal model. *PeerJ*. 2018;6:e5434.  
1276 <http://www.ncbi.nlm.nih.gov/pubmed/30155353> Epub 2018/08/30.
- 1277 52. Dong J, Yuan X, Xie W. Pentoxifylline exerts anti-inflammatory effects on cerebral ischemia  
1278 reperfusion-induced injury in a rat model via the p38 mitogen-activated protein kinase signaling pathway.  
1279 *Molecular medicine reports*. 2018;17(1):1141-7. <http://www.ncbi.nlm.nih.gov/pubmed/29115594> Epub  
1280 2017/11/09.
- 1281 53. Kim HK, Hwang SH, Lee SO, Kim SH, Abdi S. Pentoxifylline Ameliorates Mechanical Hyperalgesia in a  
1282 Rat Model of Chemotherapy-Induced Neuropathic Pain. *Pain physician*. 2016;19(4):E589-600.  
1283 <http://www.ncbi.nlm.nih.gov/pubmed/27228525> Epub 2016/05/27.
- 1284 54. Akbari Z, Reisi P, Torkaman-Boutorabi A, Farahmandfar M. The Effect of Pentoxifylline on Passive  
1285 Avoidance Learning and Expression of Tumor Necrosis Factor-Alpha and Caspase-3 in the Rat Hippocampus  
1286 Following Lipopolysaccharide-Induced Inflammation. *Advanced biomedical research*. 2019;8:39.  
1287 <http://www.ncbi.nlm.nih.gov/pubmed/31360680>.
- 1288 55. Poulakis N, Androutsos G, Kazi D, Bastas A, Provata A, Bitsakou C, et al. The differential effect of  
1289 pentoxifylline on cytokine production by alveolar macrophages and its clinical implications. *Respiratory  
1290 medicine*. 1999;93(1):52-7. <http://www.ncbi.nlm.nih.gov/pubmed/10464849> Epub 1999/08/28.
- 1291 56. Annamaraju P, Baradhi KM. Pentoxifylline. *StatPearls*. Treasure Island (FL)2021.
- 1292 57. Heifetz-Li JJ, Abdelsamie S, Campbell CB, Roth S, Fielding AF, Mulligan JP. Systematic review of the use  
1293 of pentoxifylline and tocopherol for the treatment of medication-related osteonecrosis of the jaw. *Oral surgery,  
1294 oral medicine, oral pathology and oral radiology*. 2019;128(5):491-7 e2.  
1295 <http://www.ncbi.nlm.nih.gov/pubmed/31488389>.
- 1296 58. Bouchard C, Thieke K, Maier A, Saffrich R, Hanley-Hyde J, Ansorge W, et al. Direct induction of cyclin  
1297 D2 by Myc contributes to cell cycle progression and sequestration of p27. *The EMBO journal*.  
1298 1999;18(19):5321-33. <http://www.ncbi.nlm.nih.gov/pubmed/10508165>.
- 1299 59. Brugarolas J, Bronson RT, Jacks T. p21 is a critical CDK2 regulator essential for proliferation control in  
1300 Rb-deficient cells. *The Journal of cell biology*. 1998;141(2):503-14.  
1301 <http://www.ncbi.nlm.nih.gov/pubmed/9548727>.
- 1302 60. Ghasemnejad-Berenji M, Pashapour S, Sadeghpour S. Pentoxifylline: A Drug with Antiviral and  
1303 Anti-Inflammatory Effects to Be Considered in the Treatment of Coronavirus Disease 2019. *Medical principles  
1304 and practice : international journal of the Kuwait University, Health Science Centre*. 2021;30(1):98-100.  
1305 <http://www.ncbi.nlm.nih.gov/pubmed/33049737>.
- 1306 61. Lopez-Iranzo FJ, Lopez-Rodas AM, Franco L, Lopez-Rodas G. Pentoxifylline and Oxypurinol: Potential  
1307 Drugs to Prevent the "Cytokine Release (Storm) Syndrome" Caused by SARS-CoV-2? *Current pharmaceutical*

- 1308 design. 2020;26(35):4515-21. <http://www.ncbi.nlm.nih.gov/pubmed/32787748>.
- 1309 62. Assimakopoulos SF, Seintis F, Marangos M. Pentoxifylline and complicated COVID-19: A  
1310 pathophysiologically based treatment proposal. Medical hypotheses. 2020;143:109926.  
1311 <http://www.ncbi.nlm.nih.gov/pubmed/32485316>.
- 1312 63. Pal S, Porwal K, Singh H, Malik MY, Rashid M, Kulkarni C, et al. Reversal of Osteopenia in  
1313 Ovariectomized Rats by Pentoxifylline: Evidence of Osteogenic and Osteo-Angiogenic Roles of the Drug.  
1314 Calcified tissue international. 2019;105(3):294-307. <http://www.ncbi.nlm.nih.gov/pubmed/31175387>.
- 1315 64. Tsutsumimoto T, Wakabayashi S, Kinoshita T, Horiuchi H, Takaoka K. A phosphodiesterase inhibitor,  
1316 pentoxifylline, enhances the bone morphogenetic protein-4 (BMP-4)-dependent differentiation of  
1317 osteoprogenitor cells. Bone. 2002;31(3):396-401. <http://www.ncbi.nlm.nih.gov/pubmed/12231412>.
- 1318 65. Windischhofer W, Zach D, Fauler G, Raspotnig G, Kofeler H, Leis HJ. Involvement of Rho and p38  
1319 MAPK in endothelin-1-induced expression of PGHS-2 mRNA in osteoblast-like cells. Journal of bone and  
1320 mineral research : the official journal of the American Society for Bone and Mineral Research.  
1321 2002;17(10):1774-84. <http://www.ncbi.nlm.nih.gov/pubmed/12369781>.
- 1322 66. Okunieff P, Augustine E, Hicks JE, Cornelison TL, Altemus RM, Naydich BG, et al. Pentoxifylline in the  
1323 treatment of radiation-induced fibrosis. Journal of clinical oncology : official journal of the American Society of  
1324 Clinical Oncology. 2004;22(11):2207-13. <http://www.ncbi.nlm.nih.gov/pubmed/15169810> Epub 2004/06/01.
- 1325 67. Frueh FS, Sanchez-Macedo N, Calcagni M, Giovanoli P, Lindenblatt N. The Crucial Role of  
1326 Vascularization and Lymphangiogenesis in Skin Reconstruction. European surgical research Europäische  
1327 chirurgische Forschung Recherches chirurgicales europeennes. 2018;59(3-4):242-54.  
1328 <http://www.ncbi.nlm.nih.gov/pubmed/30244256>.
- 1329



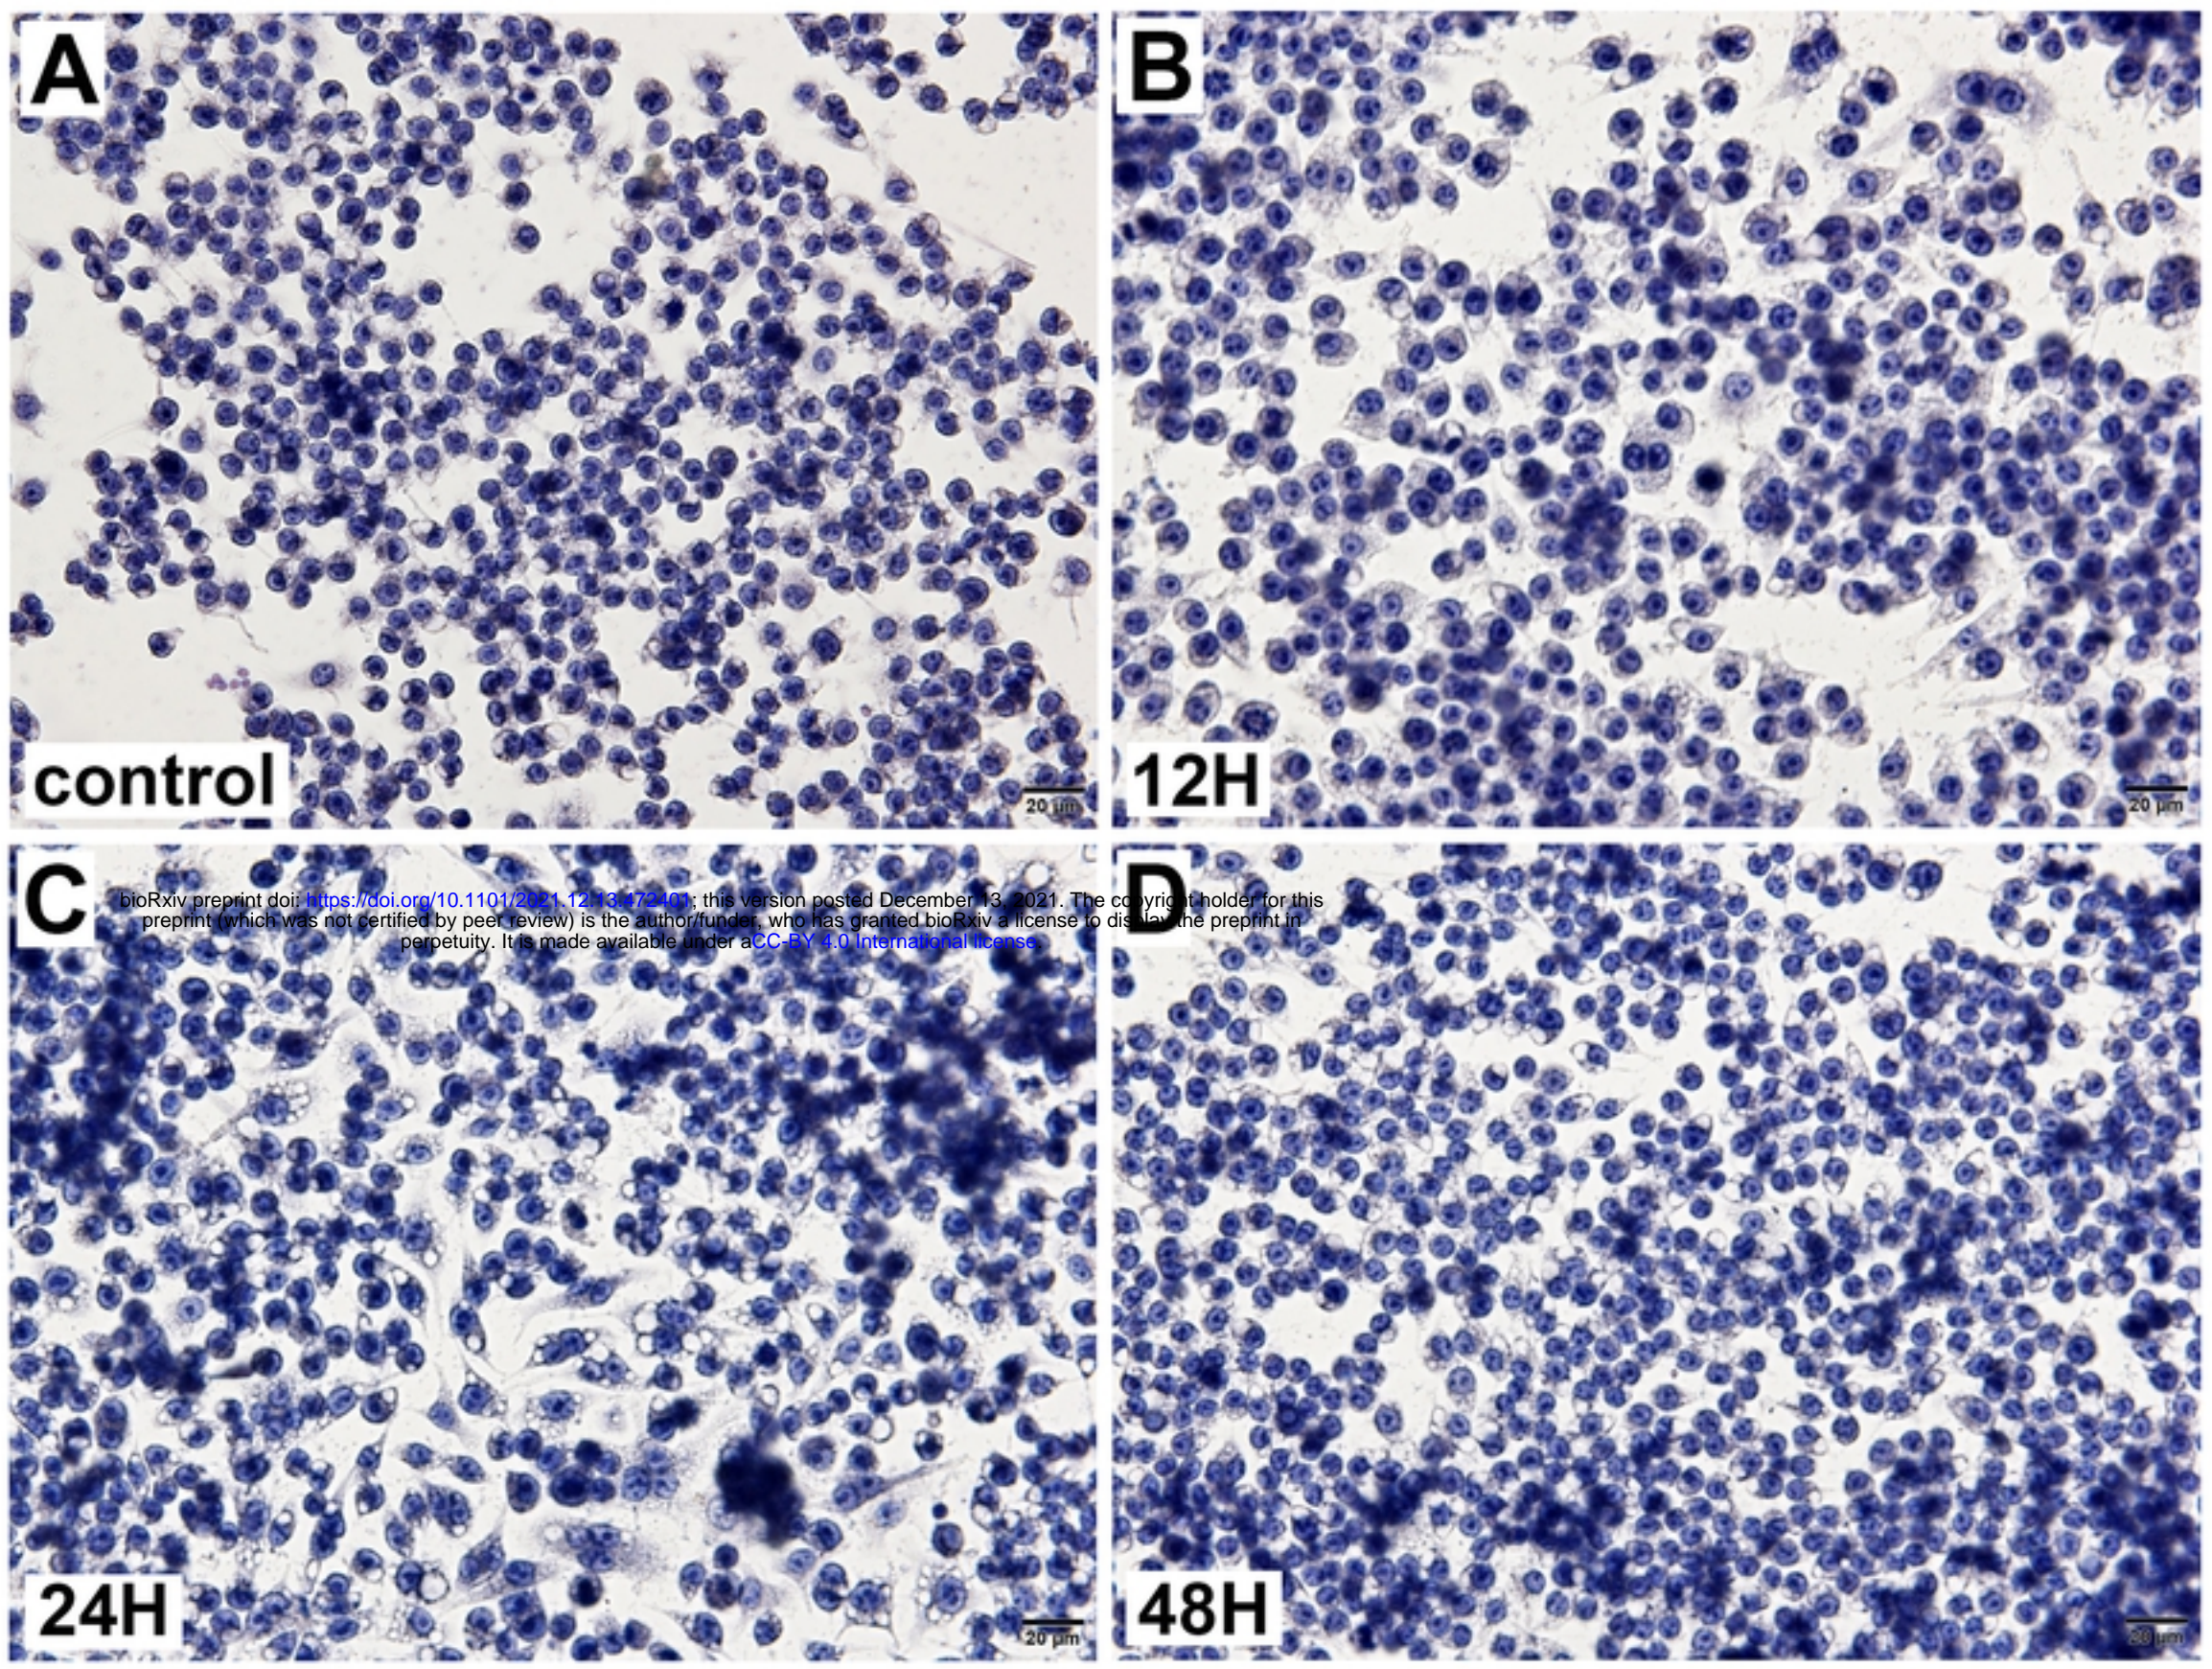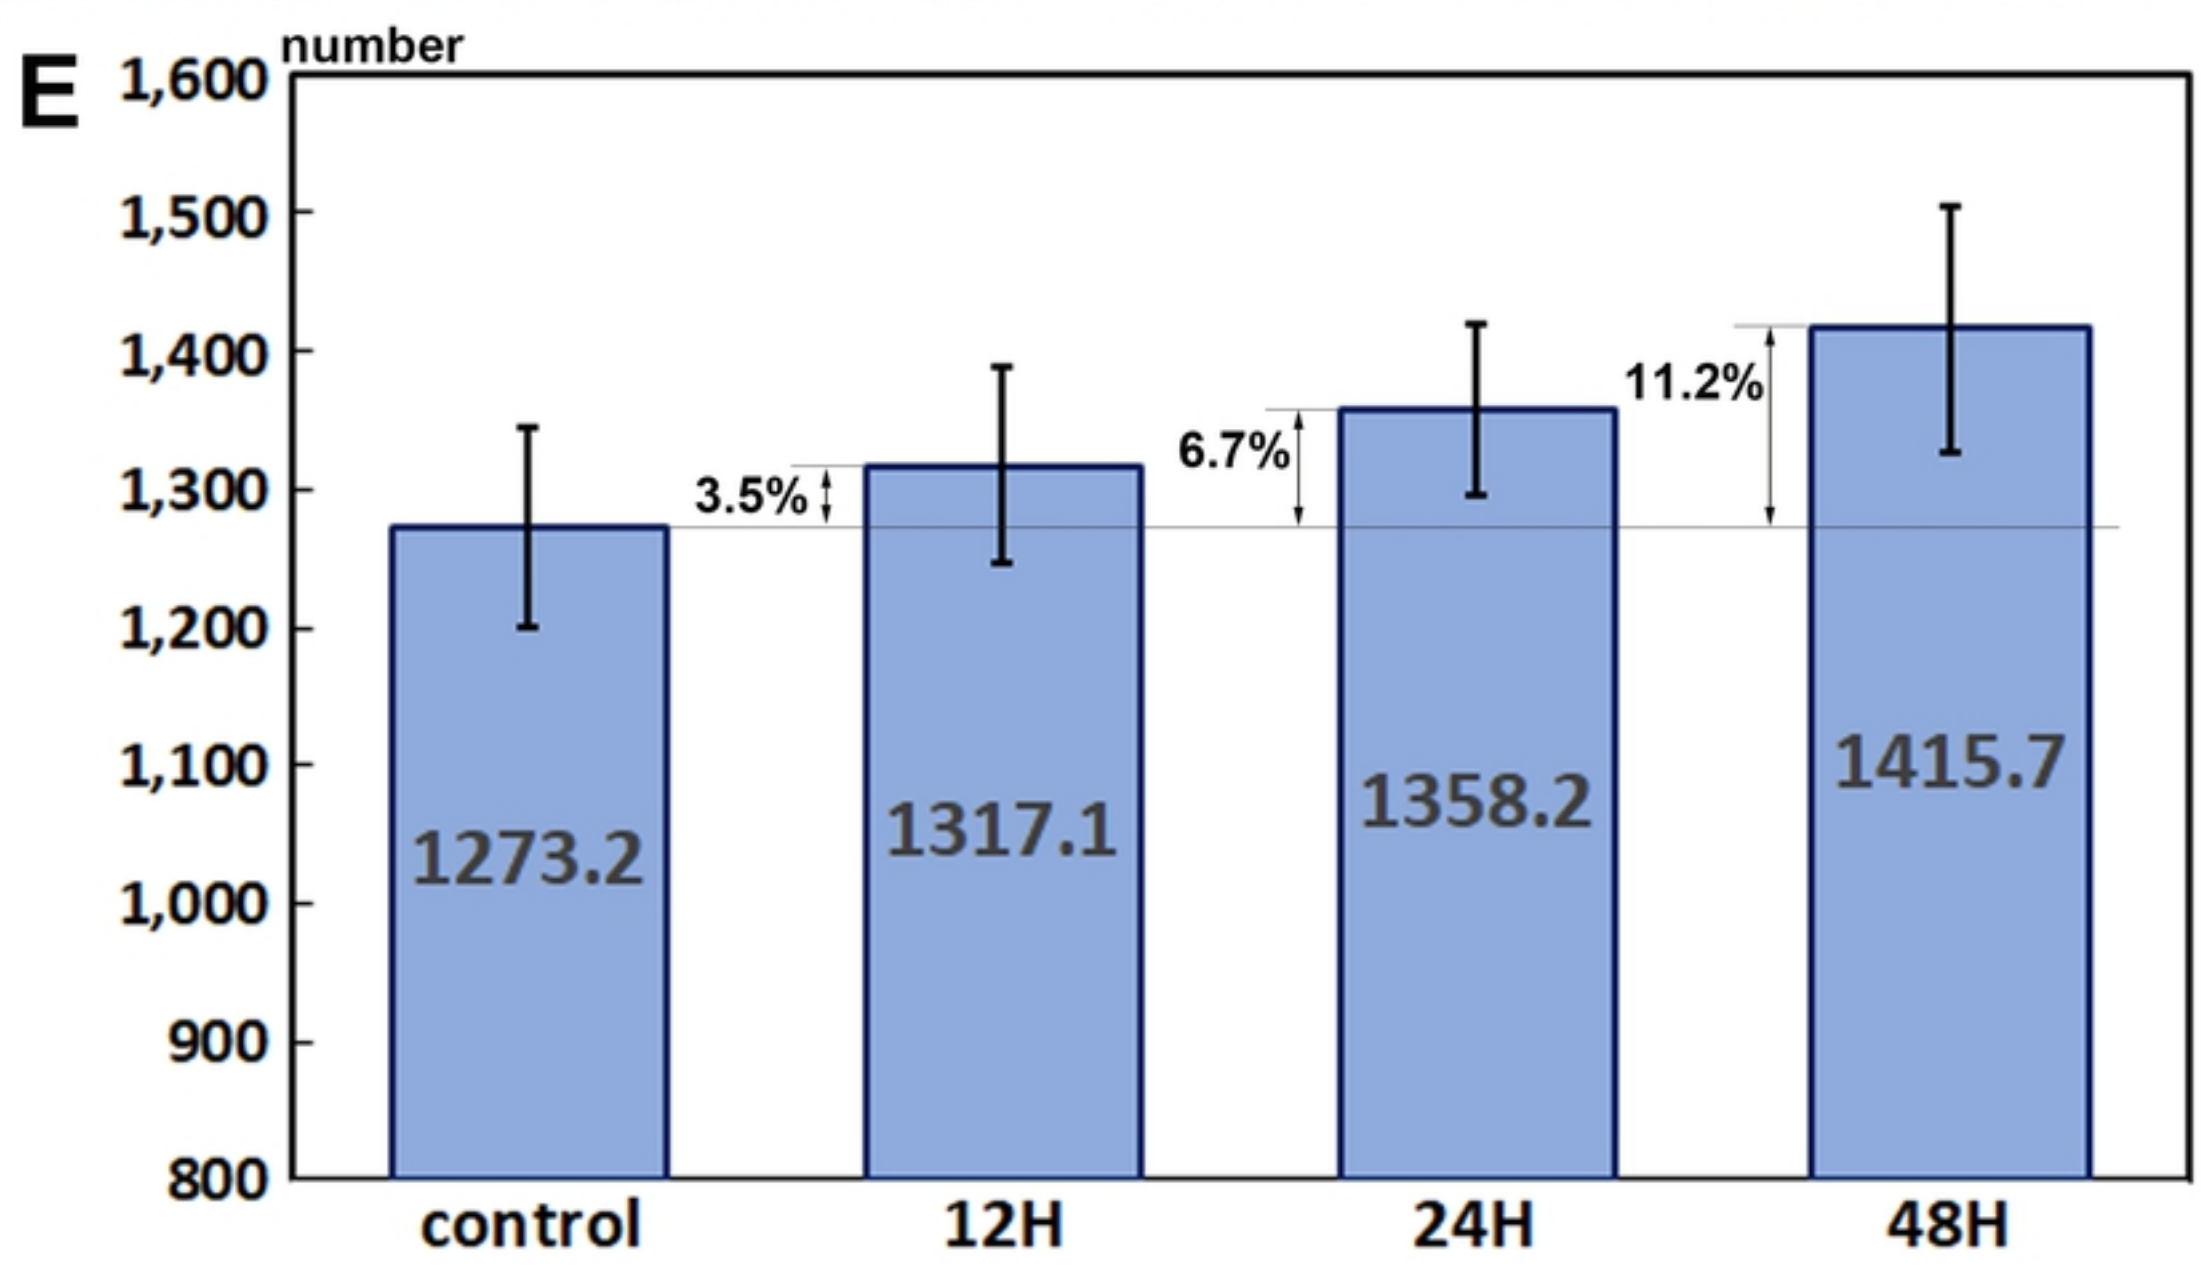

Figure 1



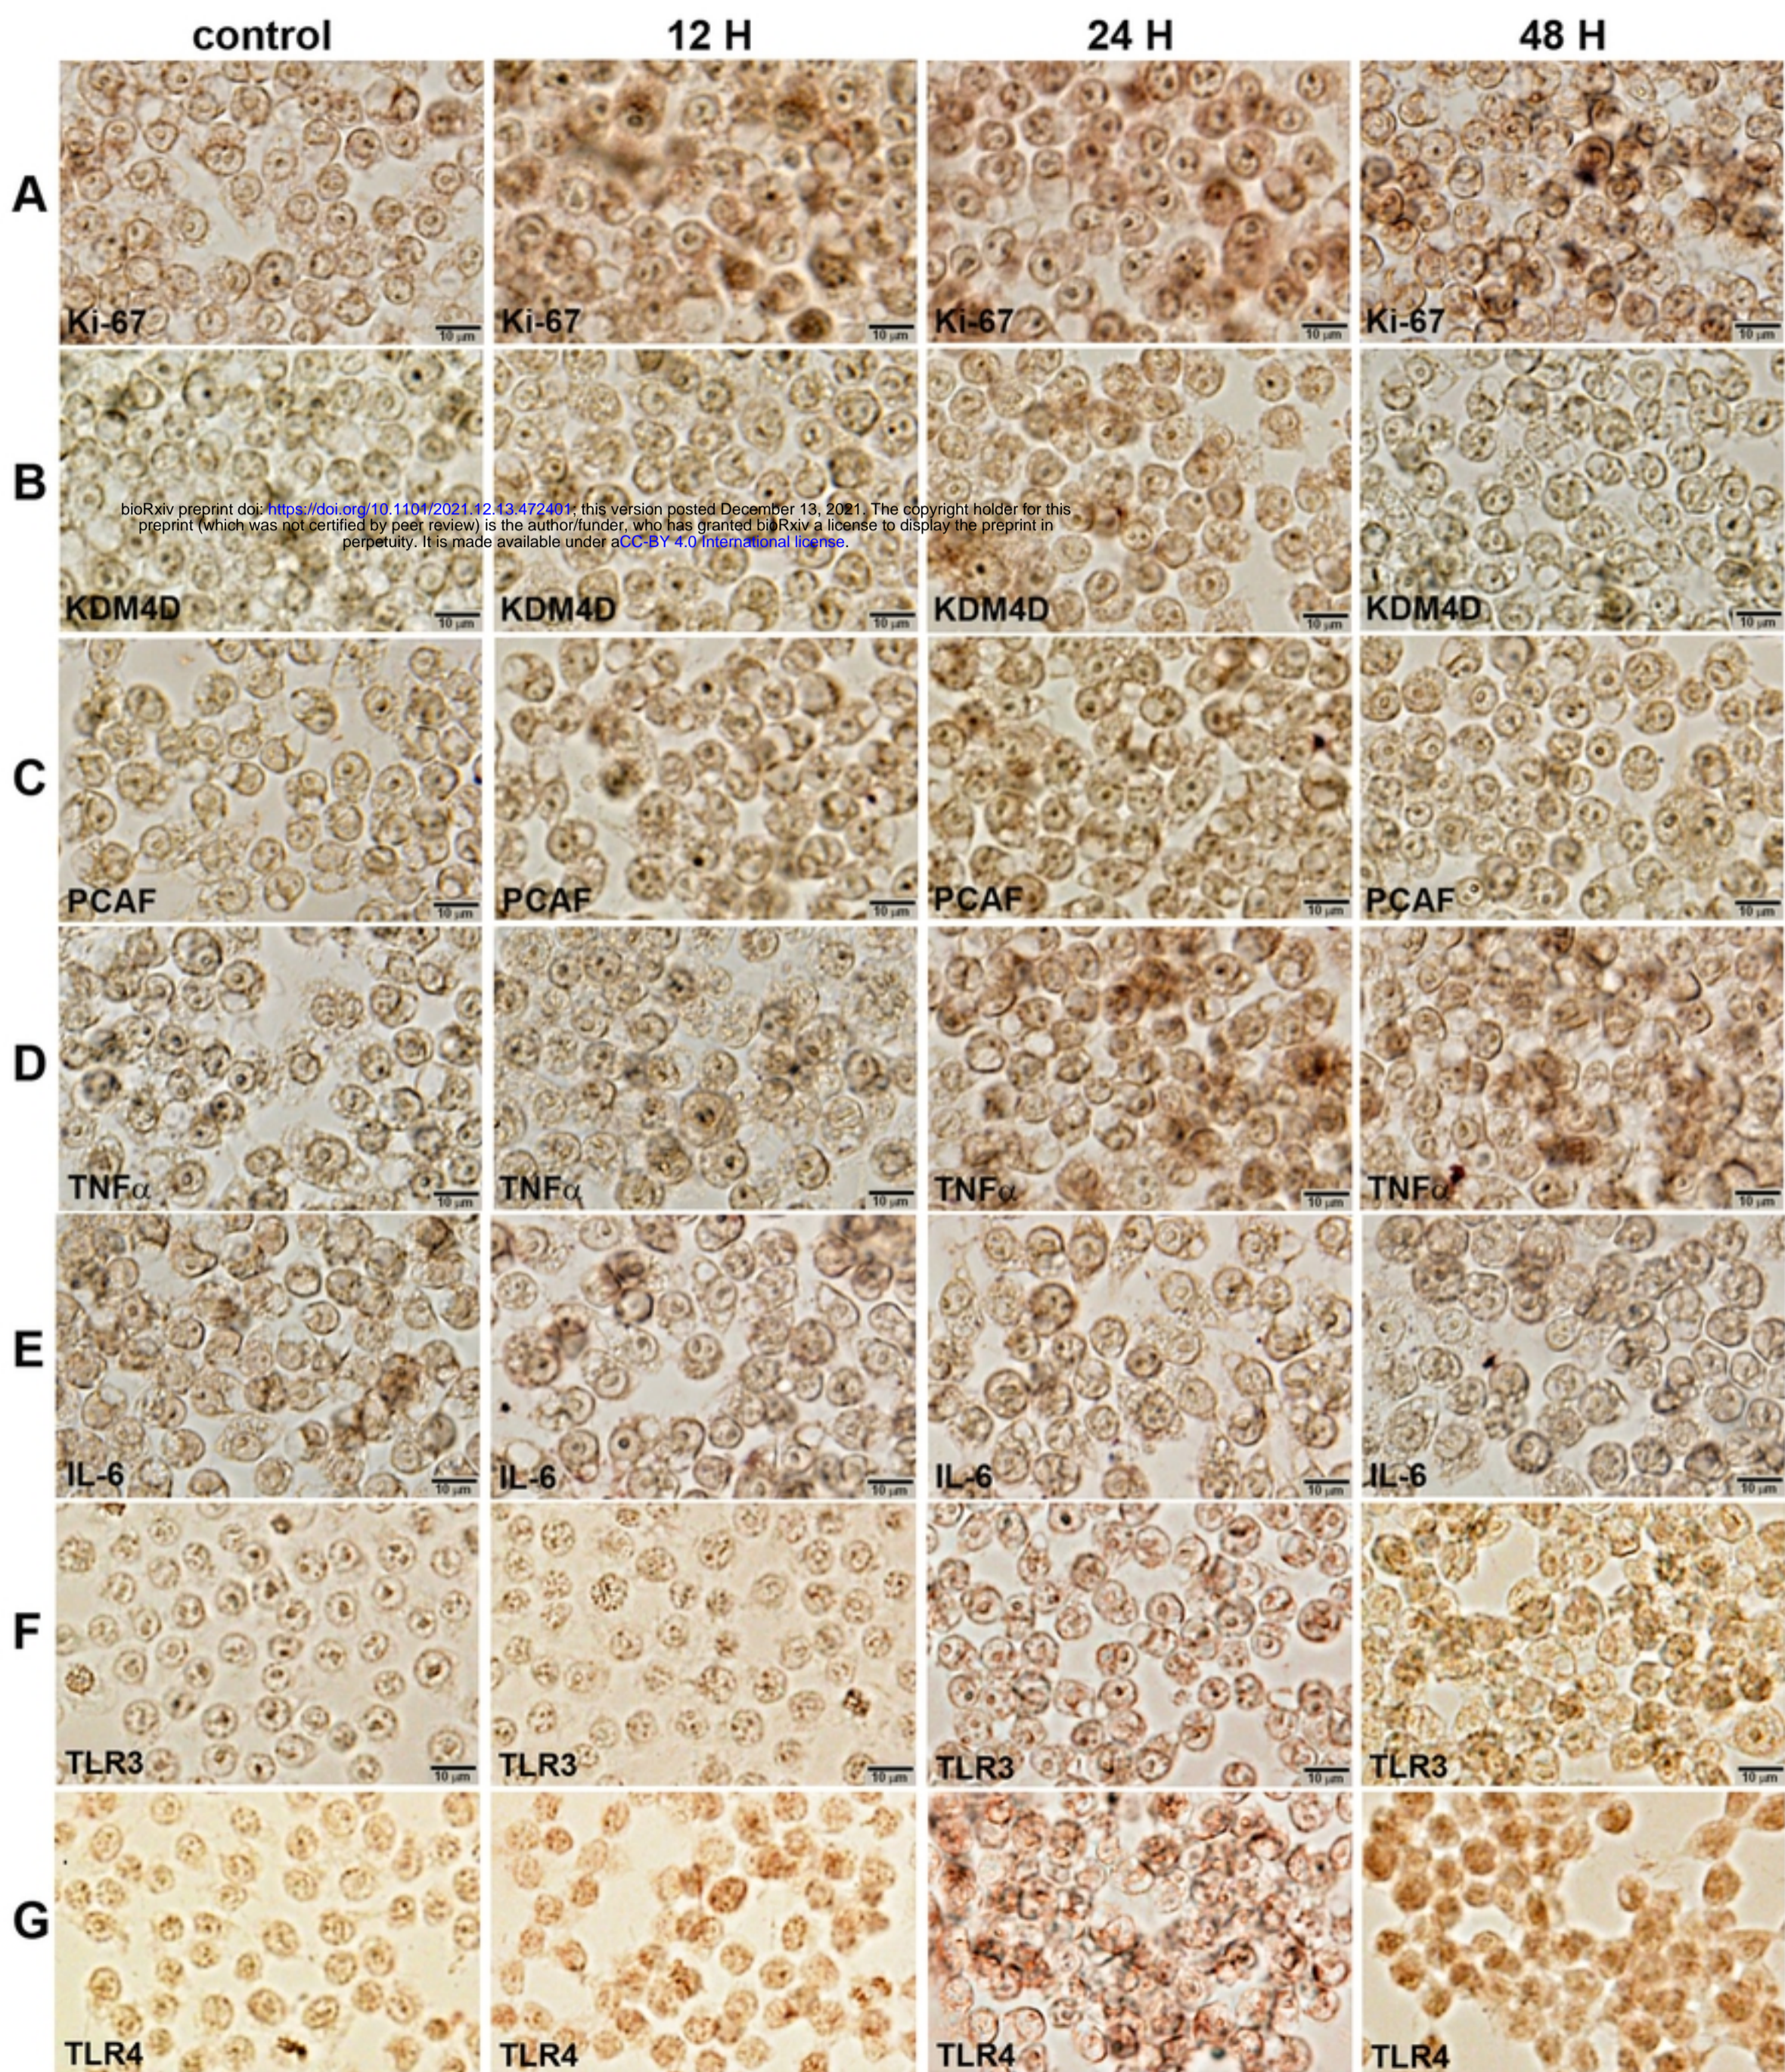

Figure 2



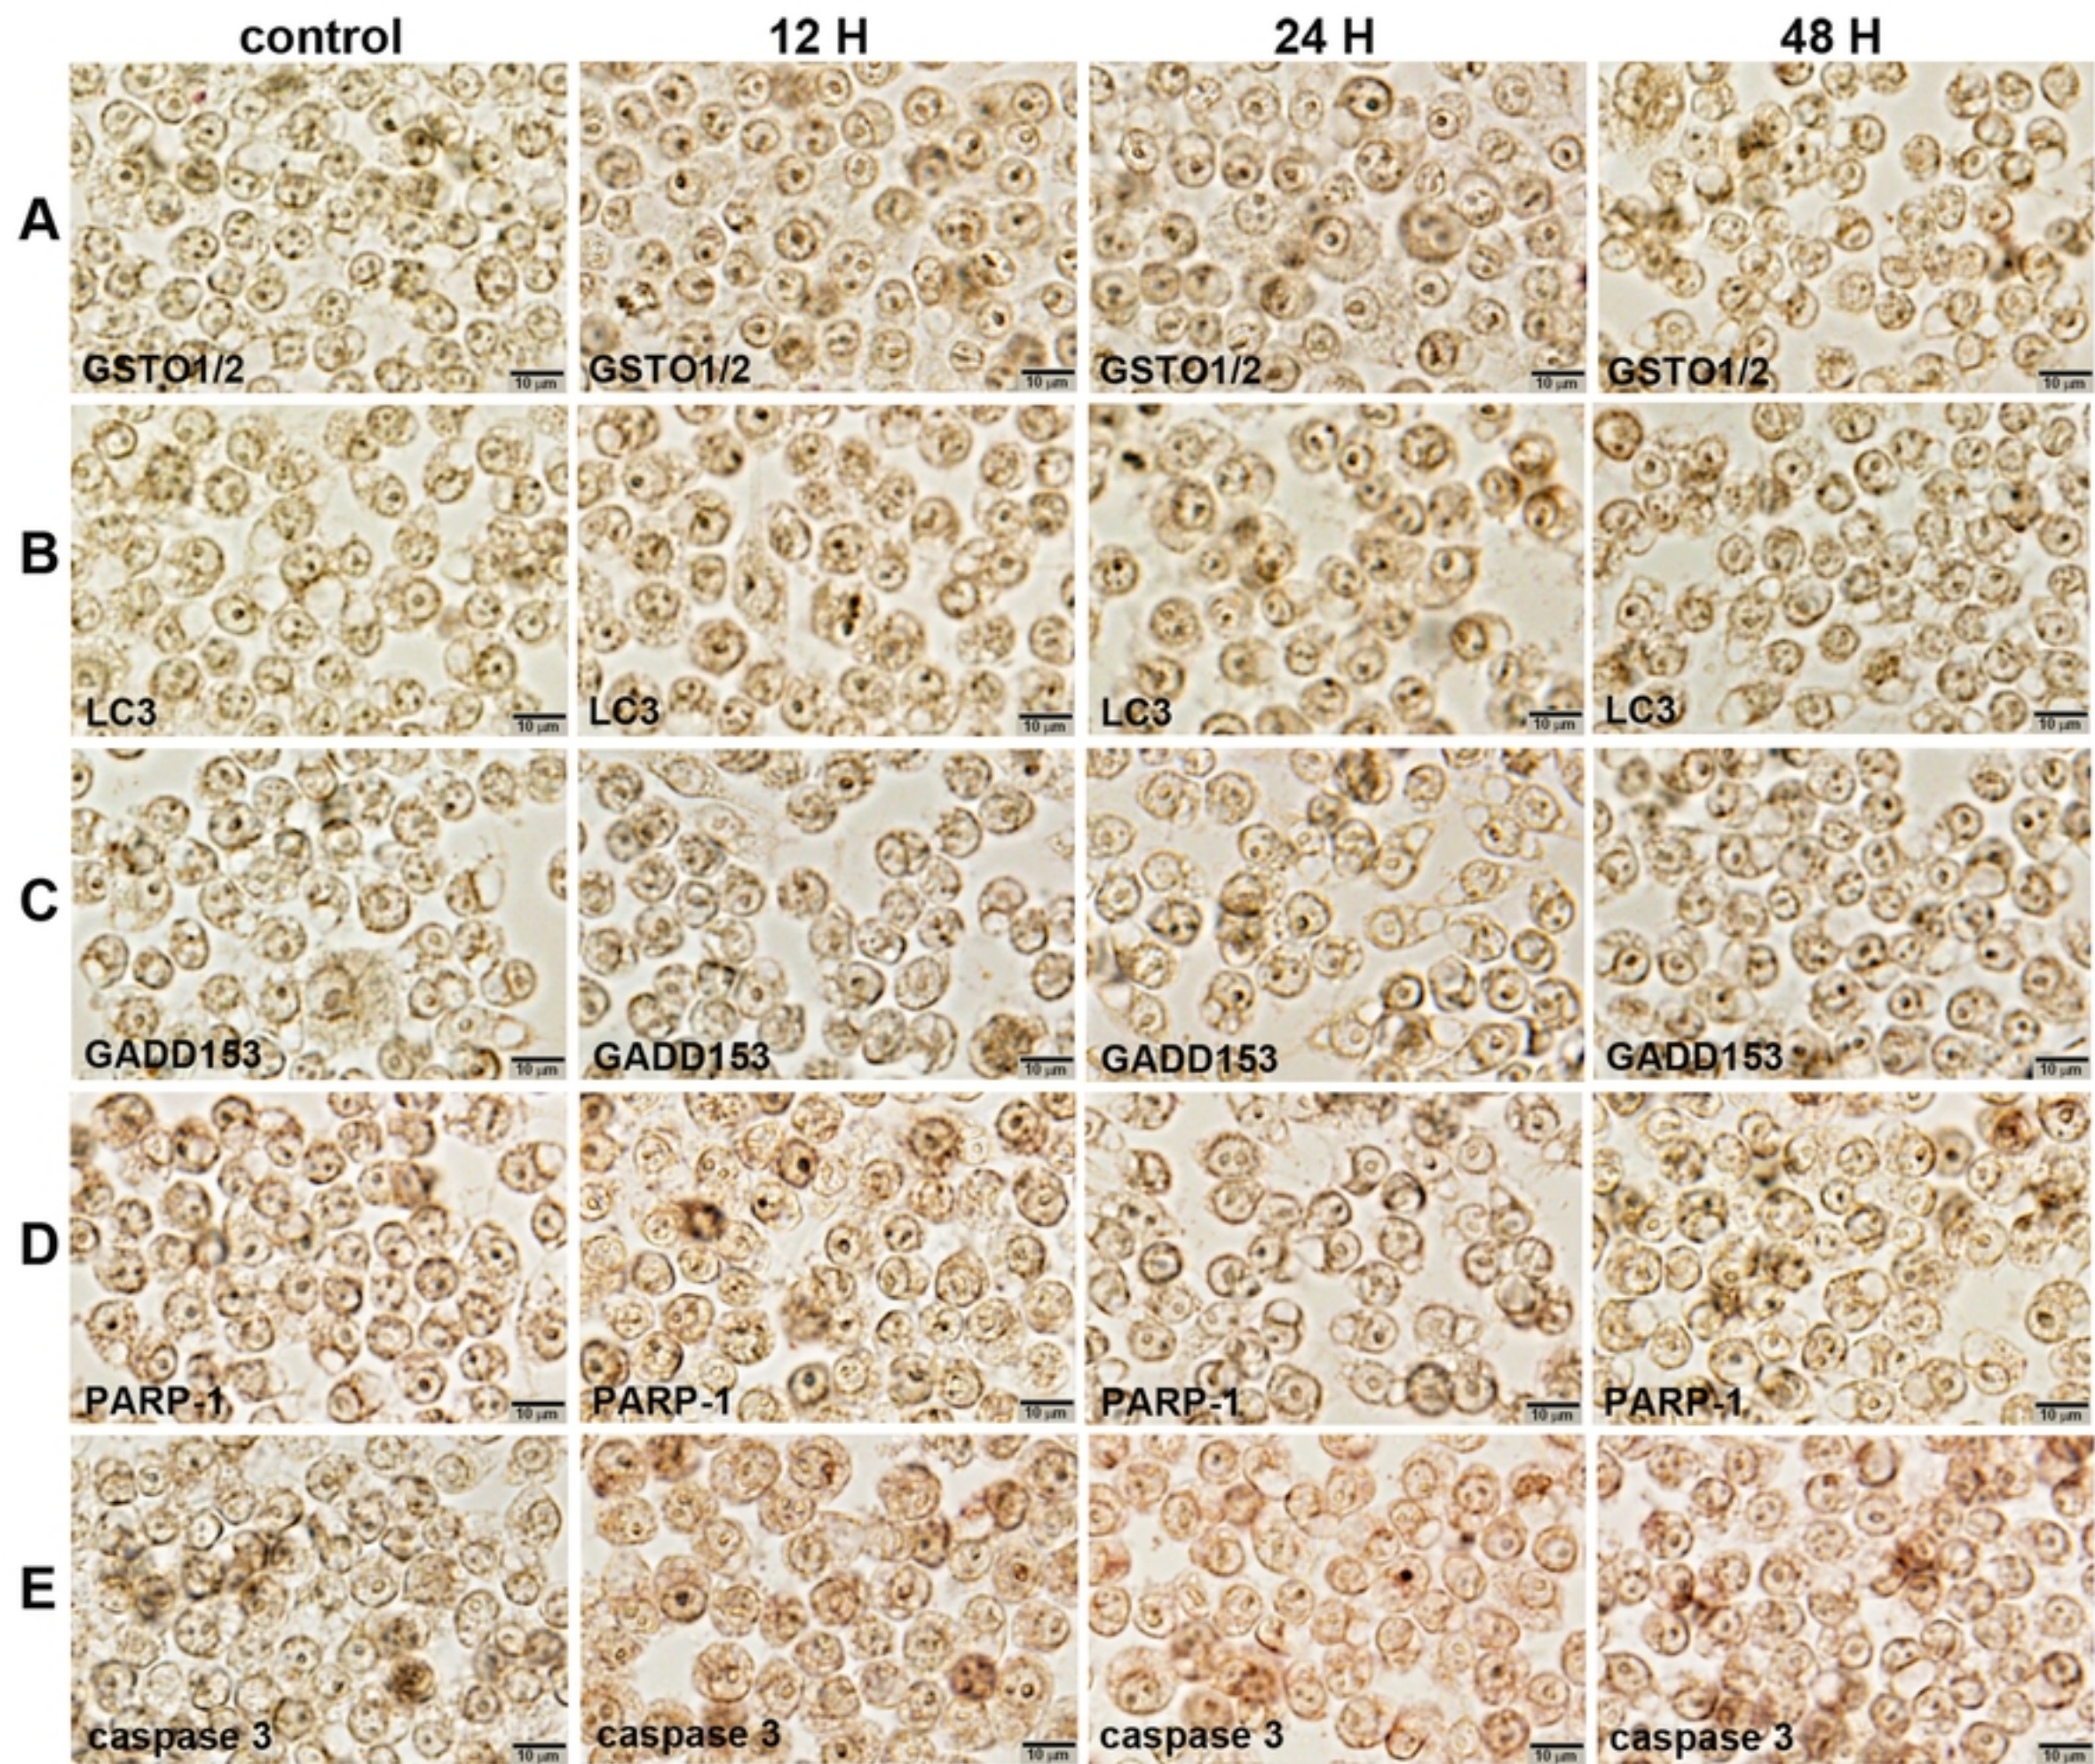

Figure 3



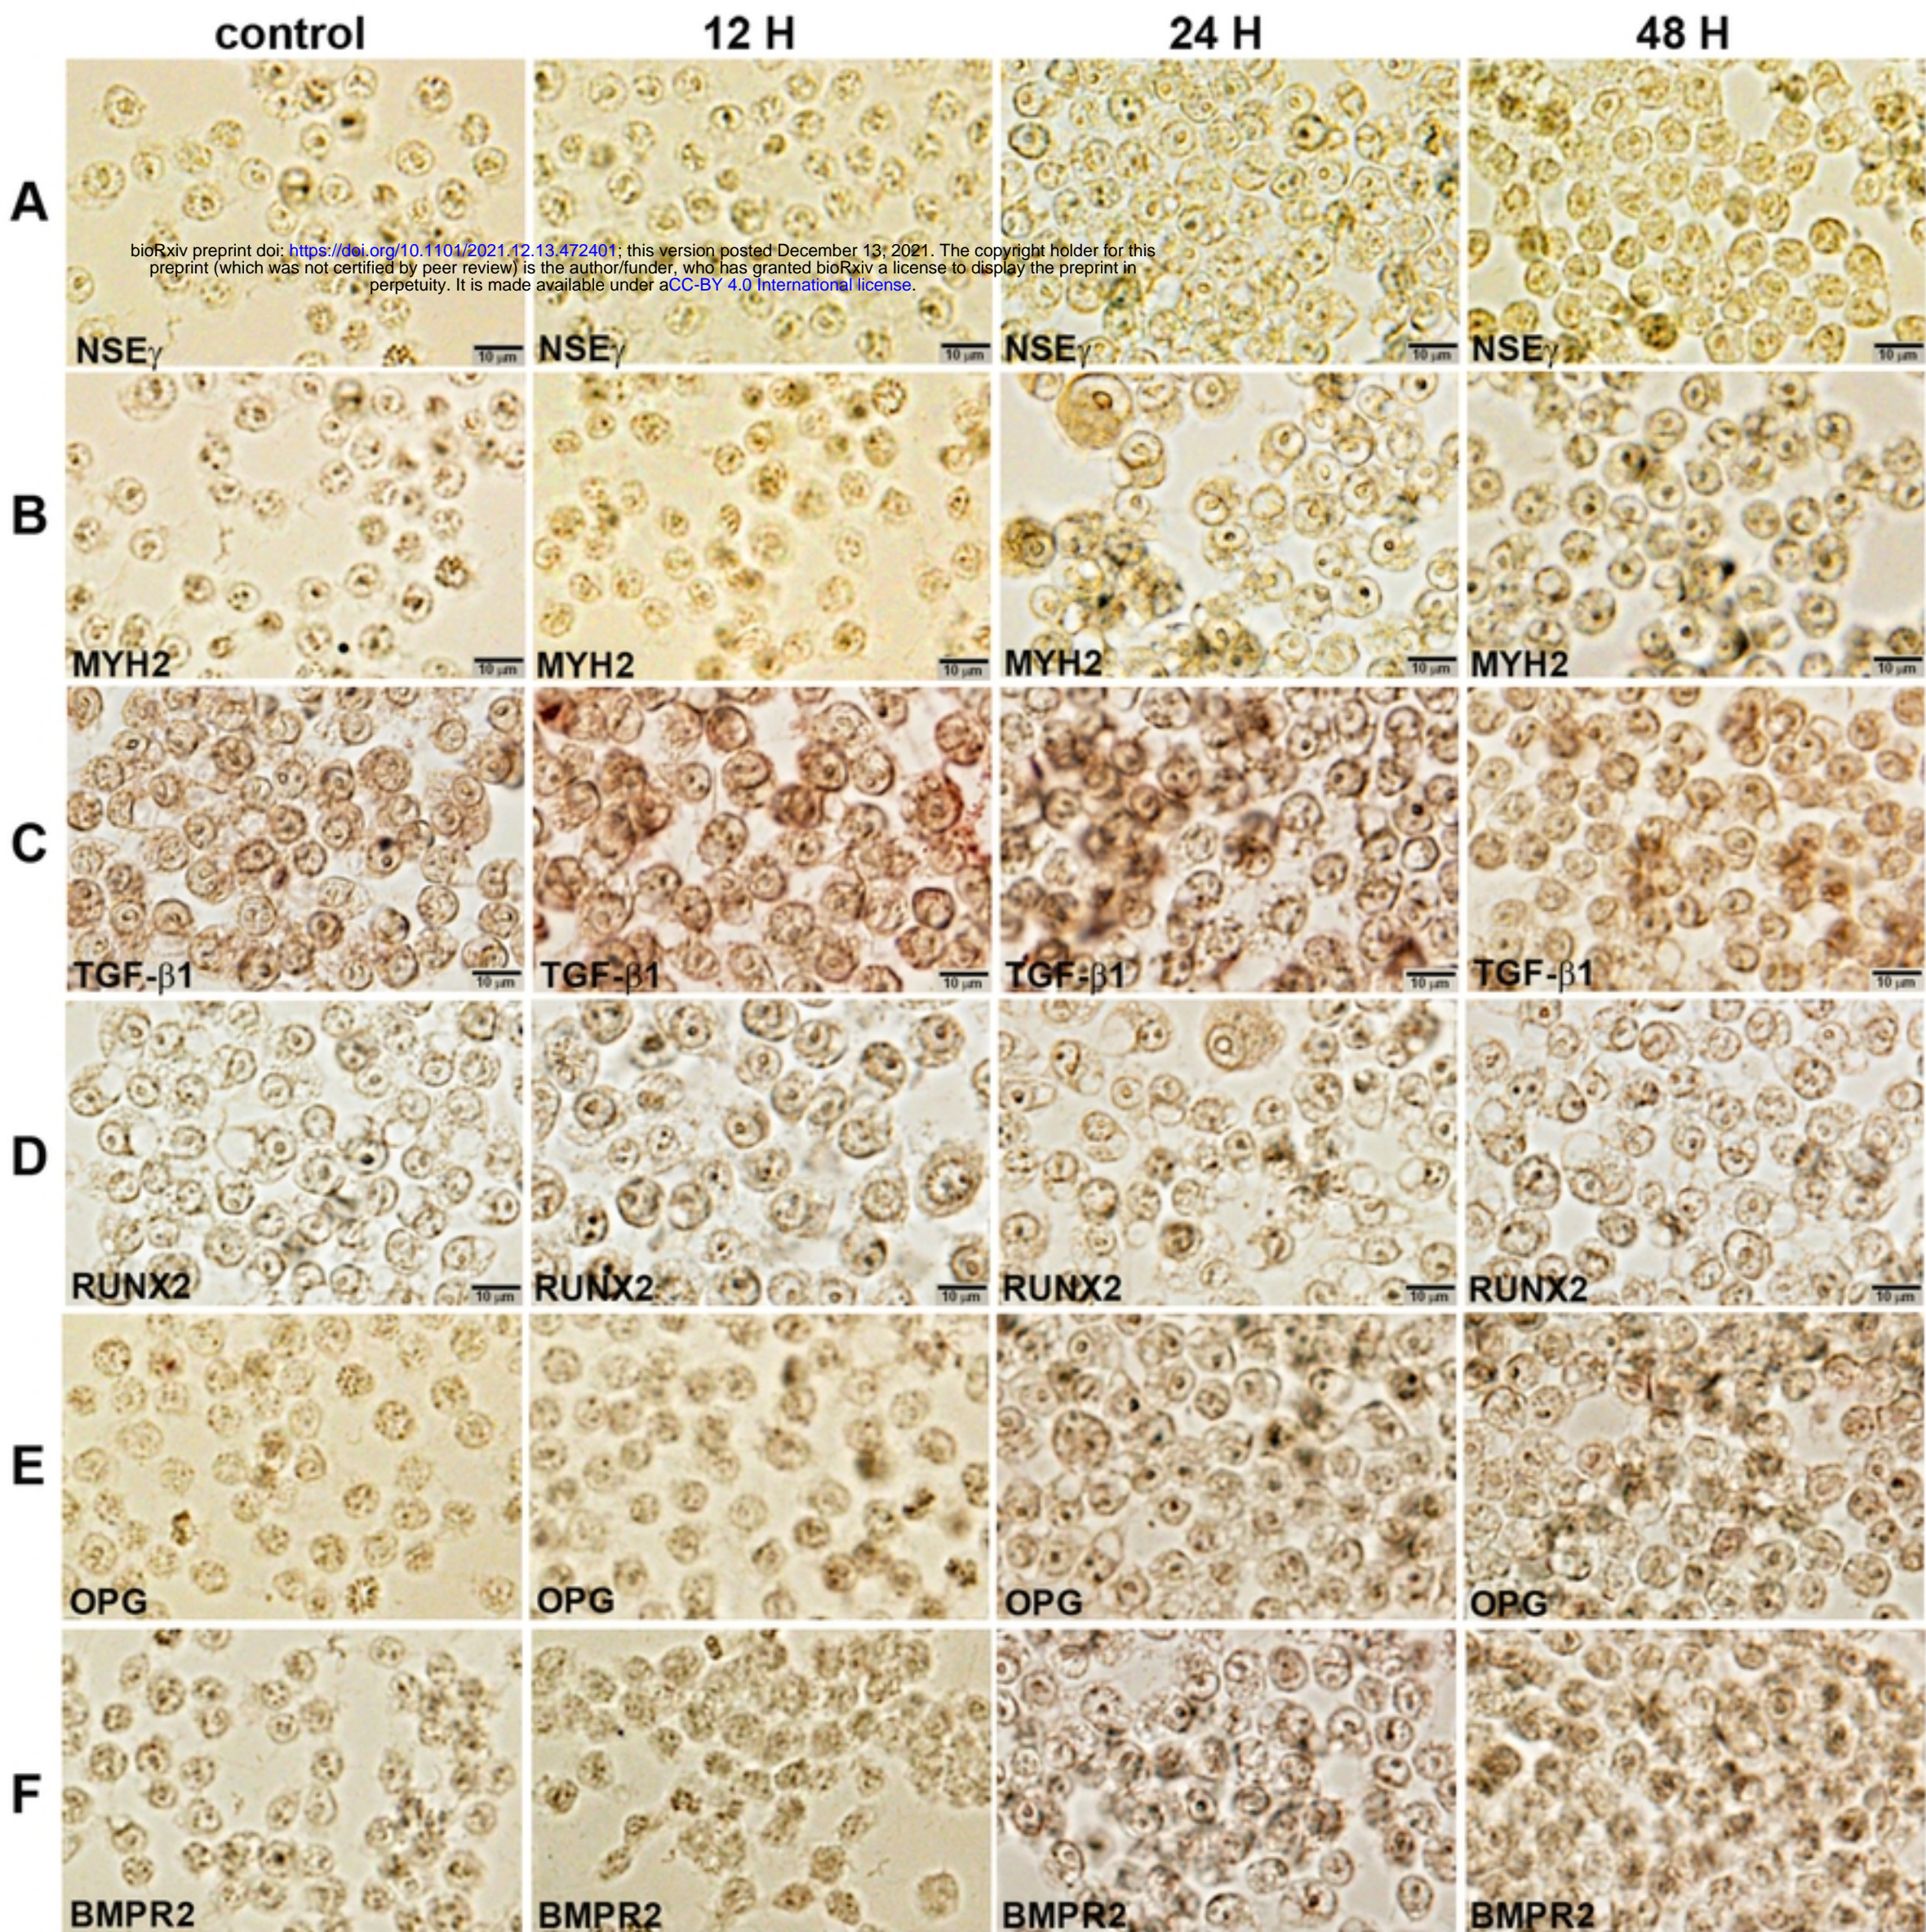

Figure 4



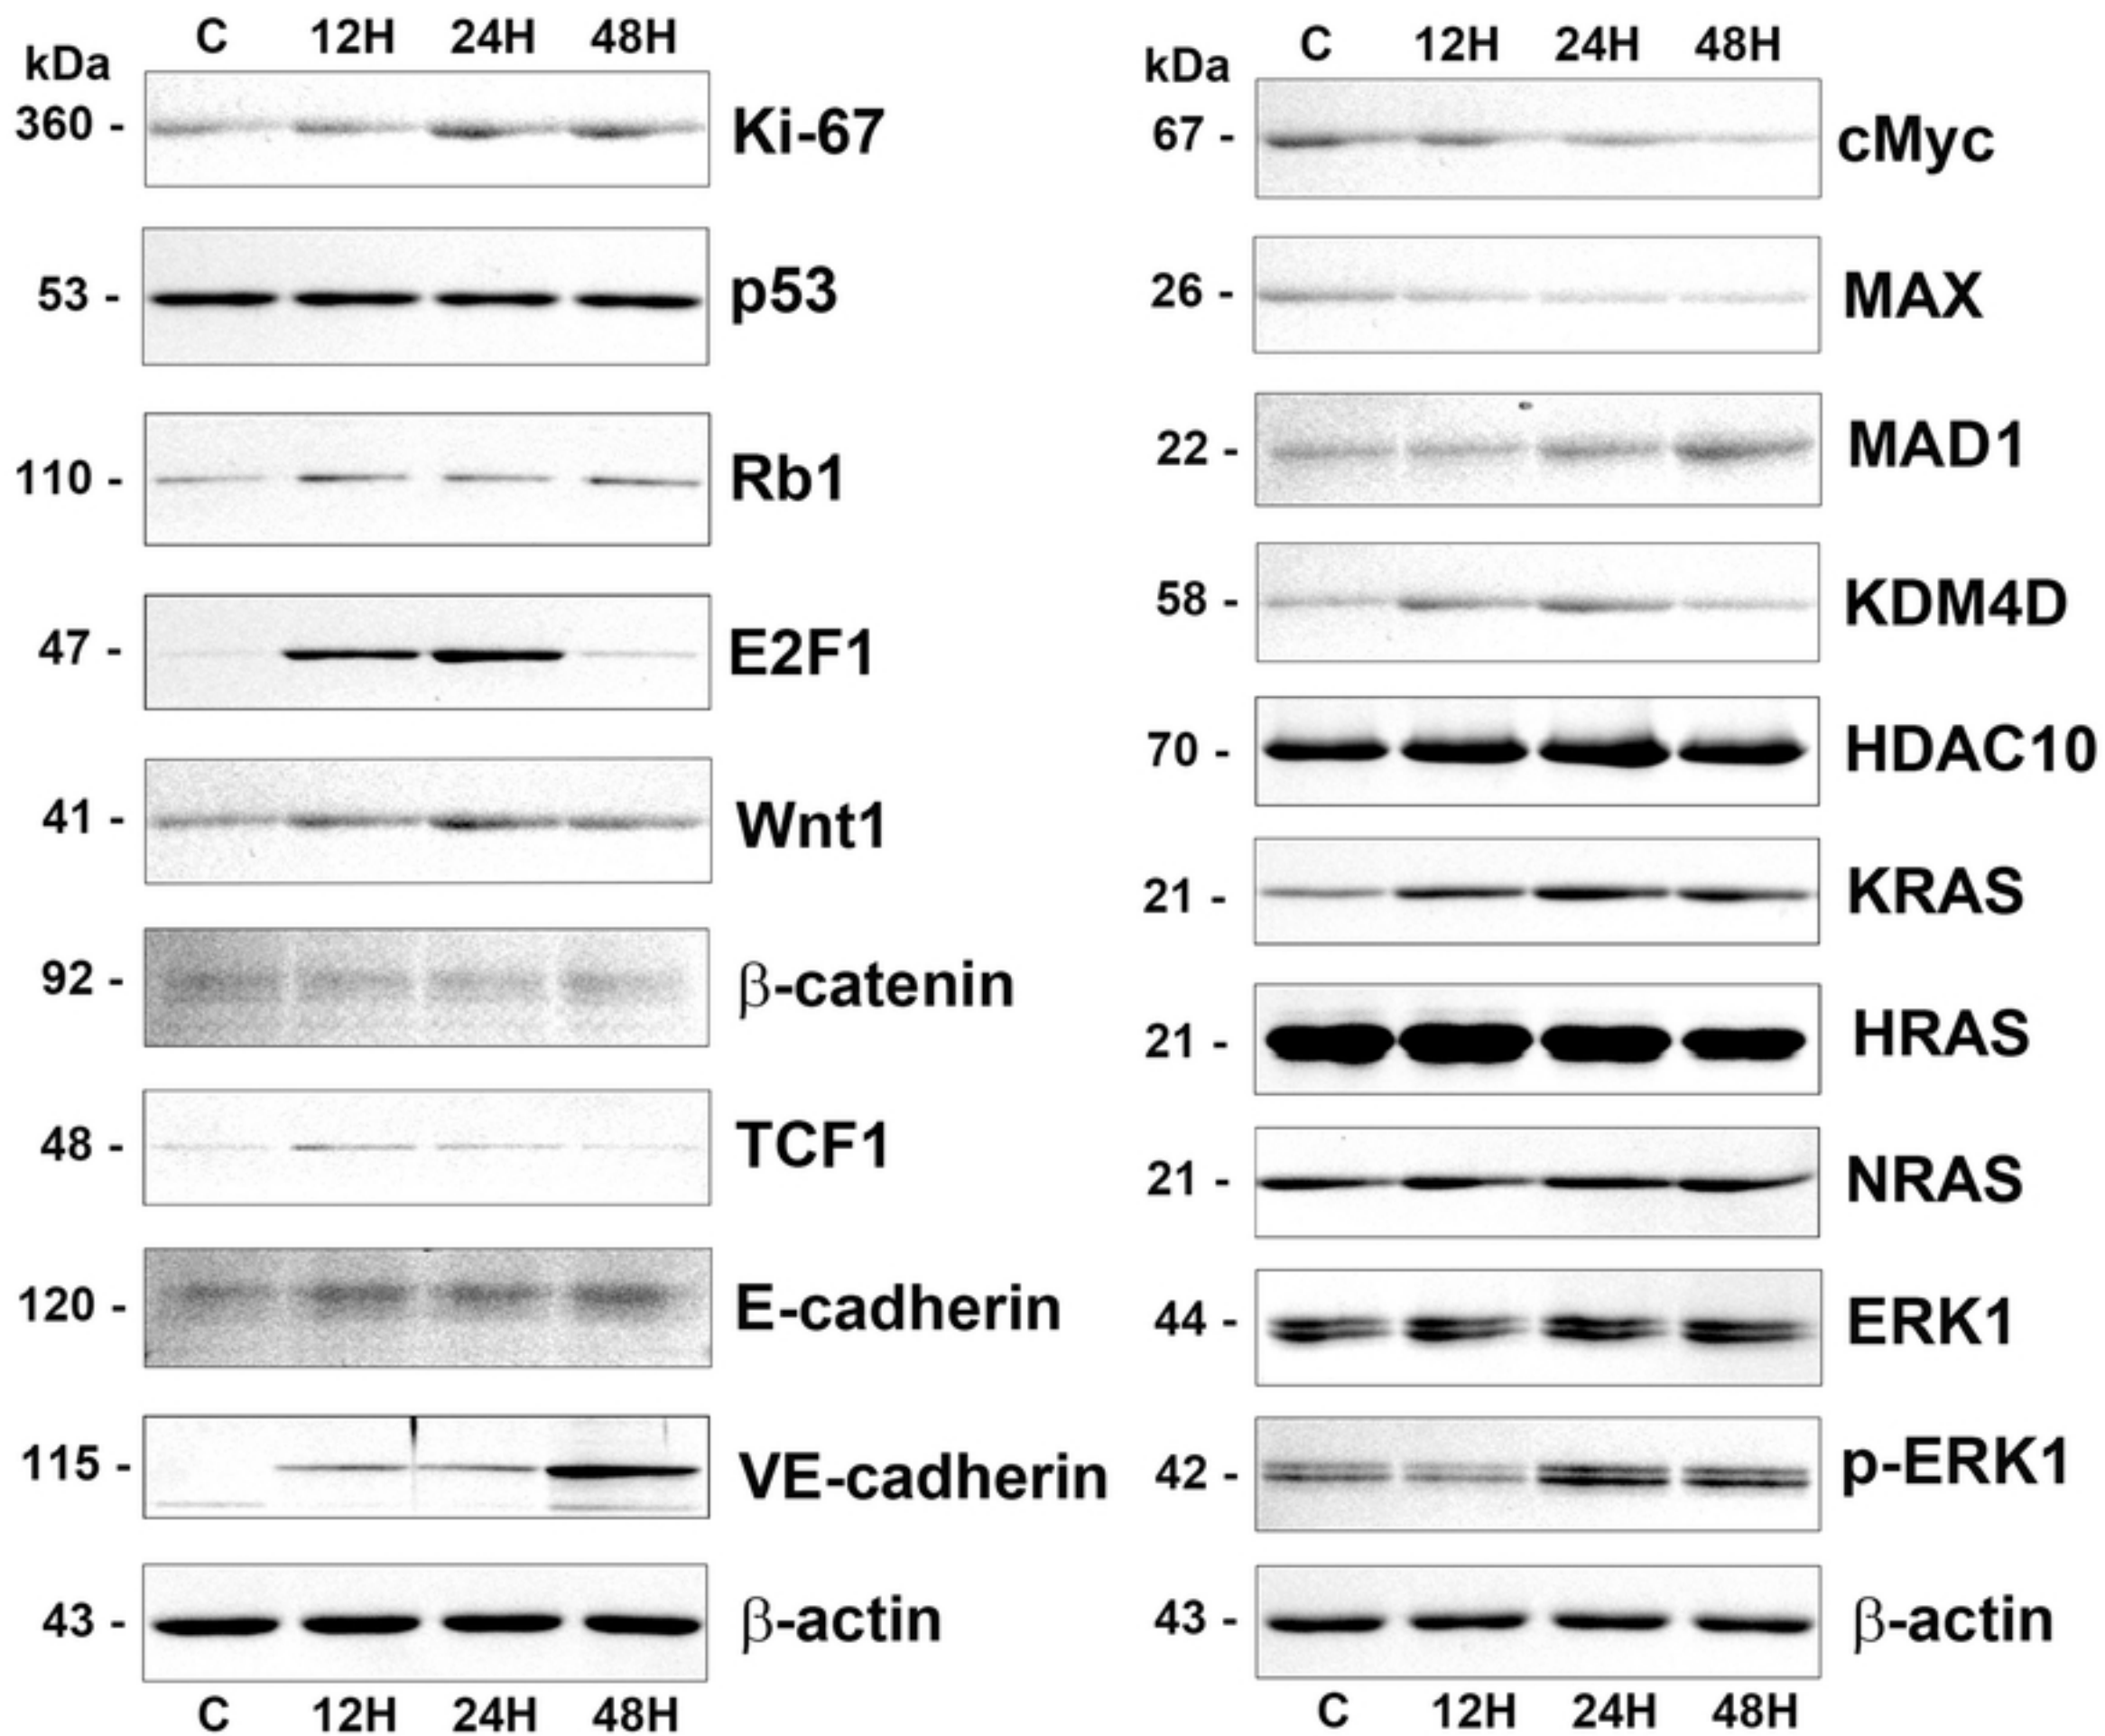

Figure 5

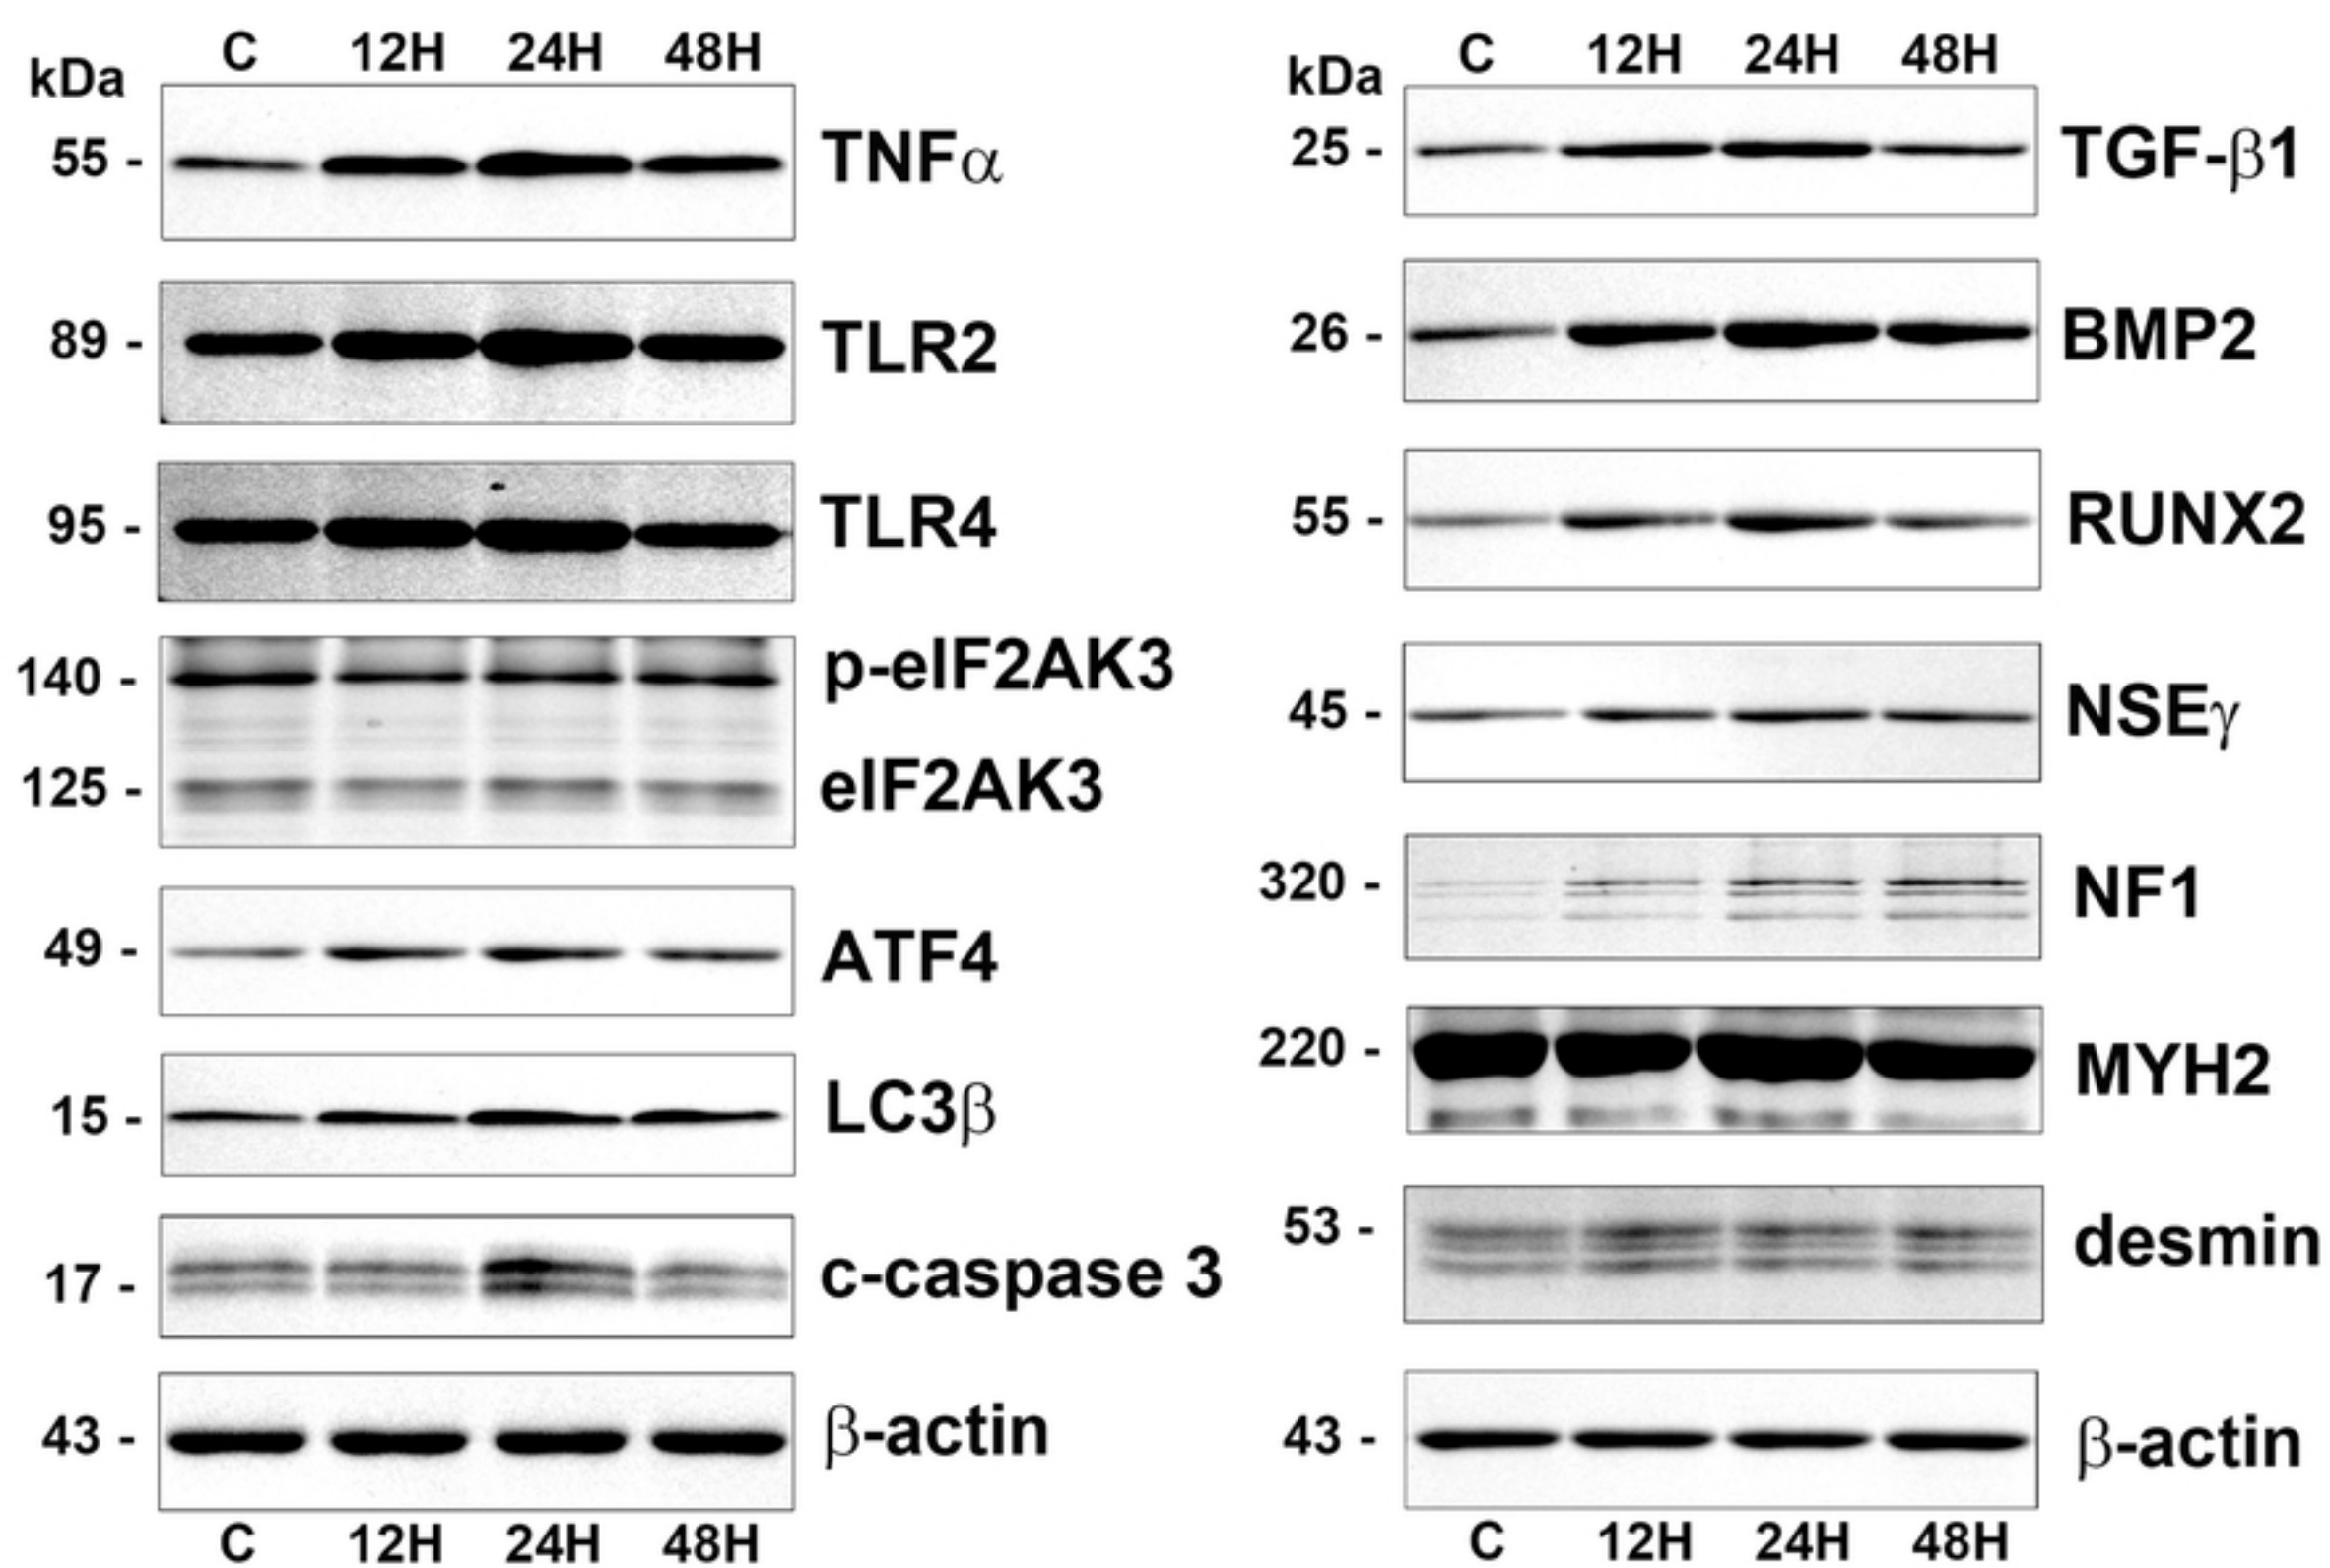

Figure 6

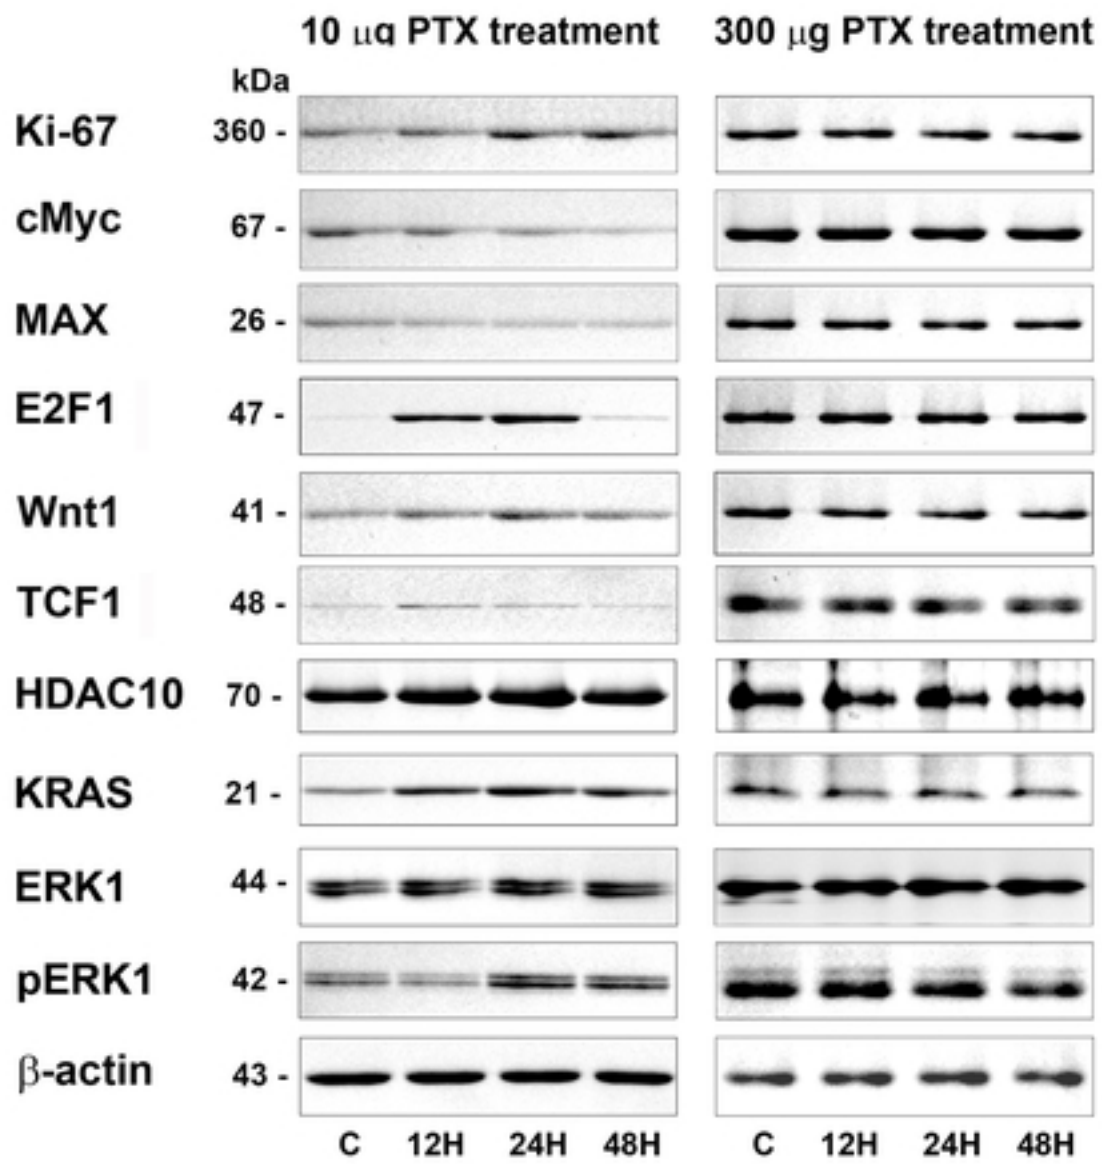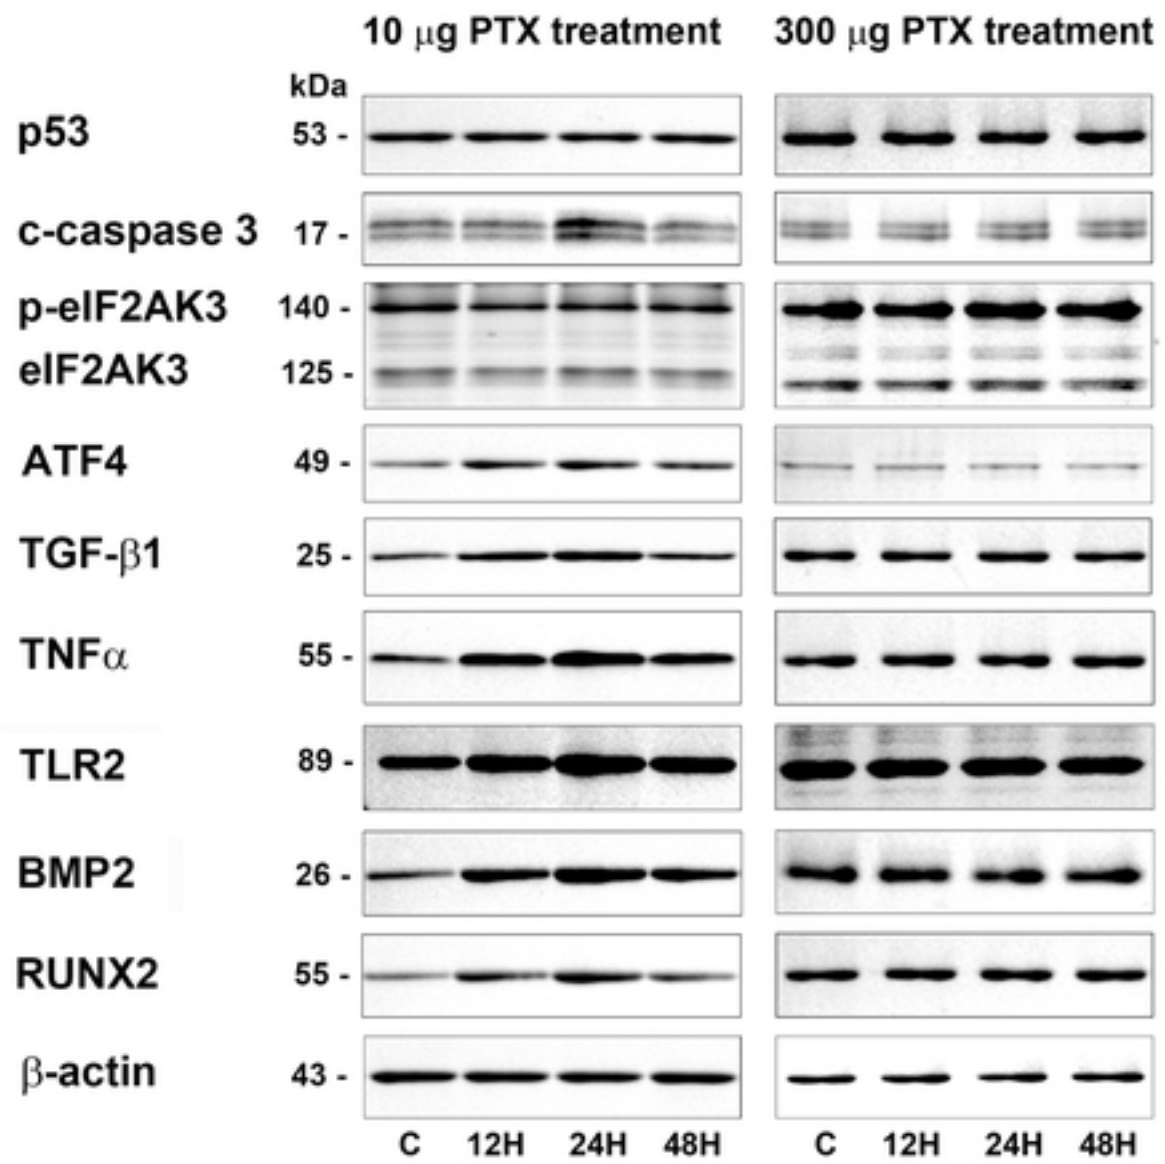

Figure 7



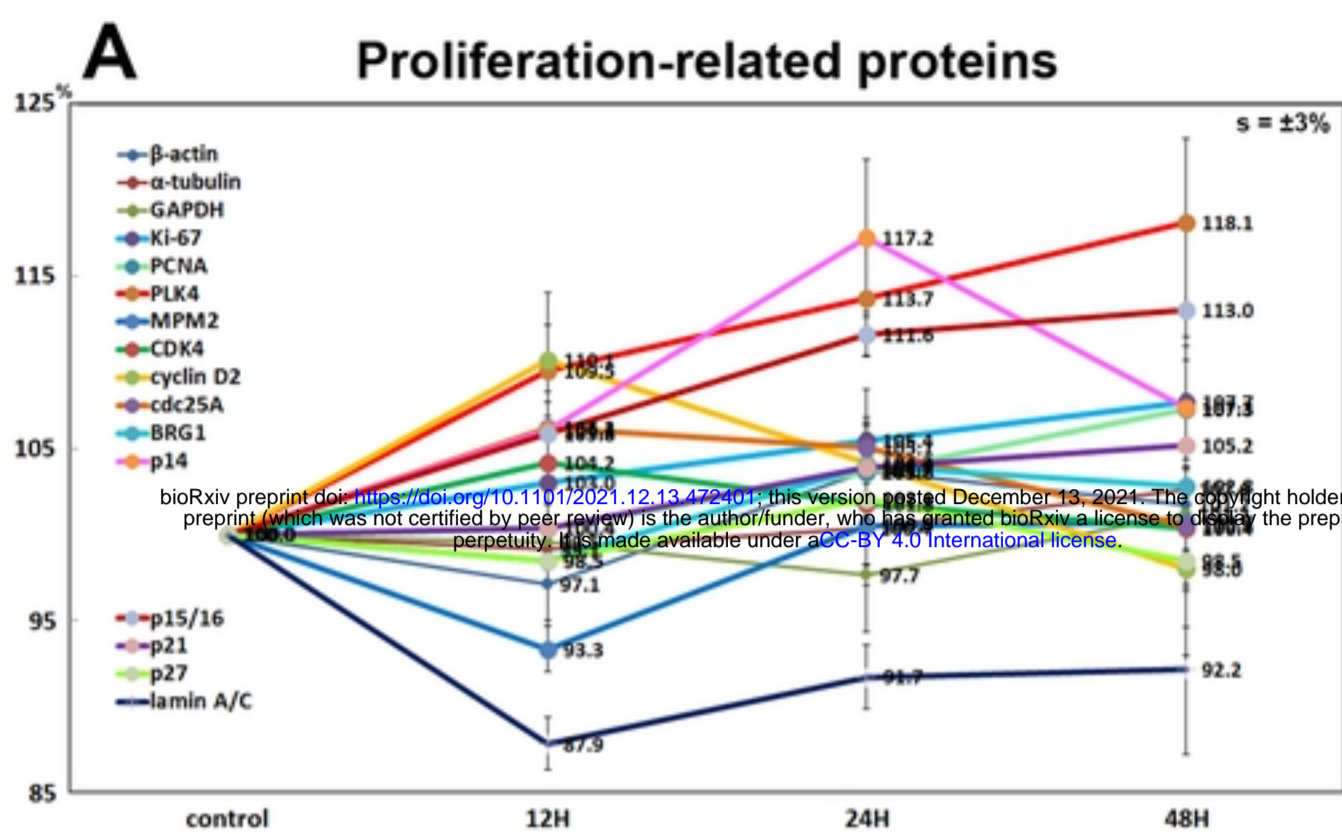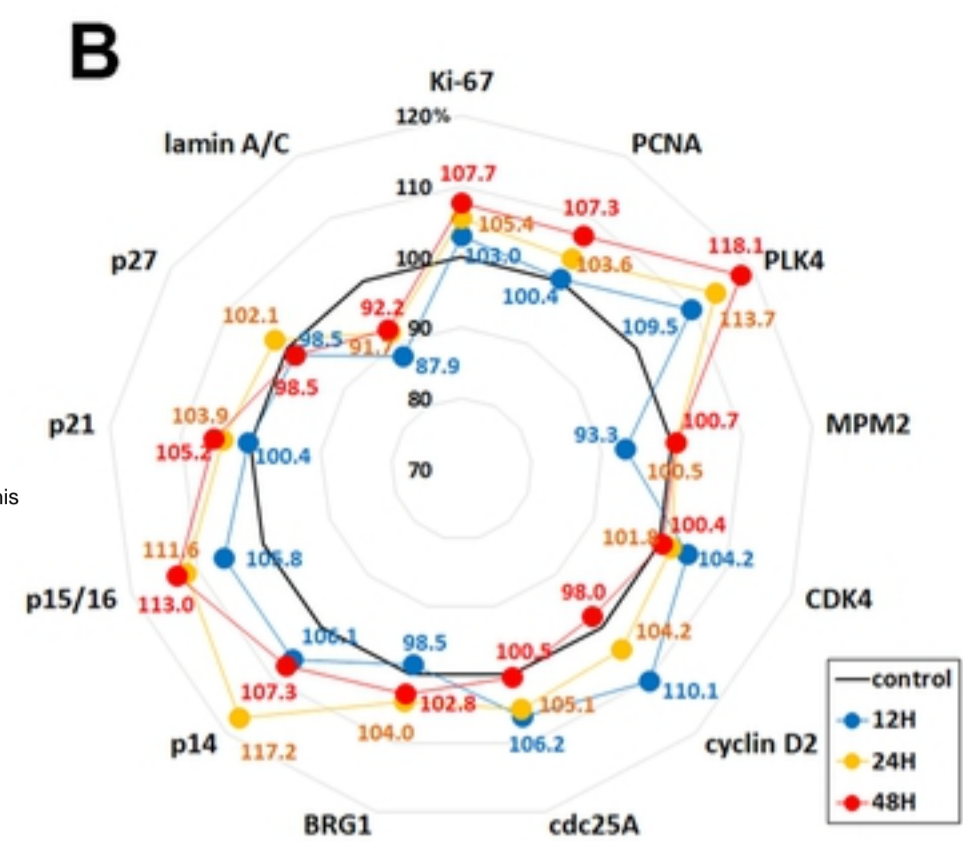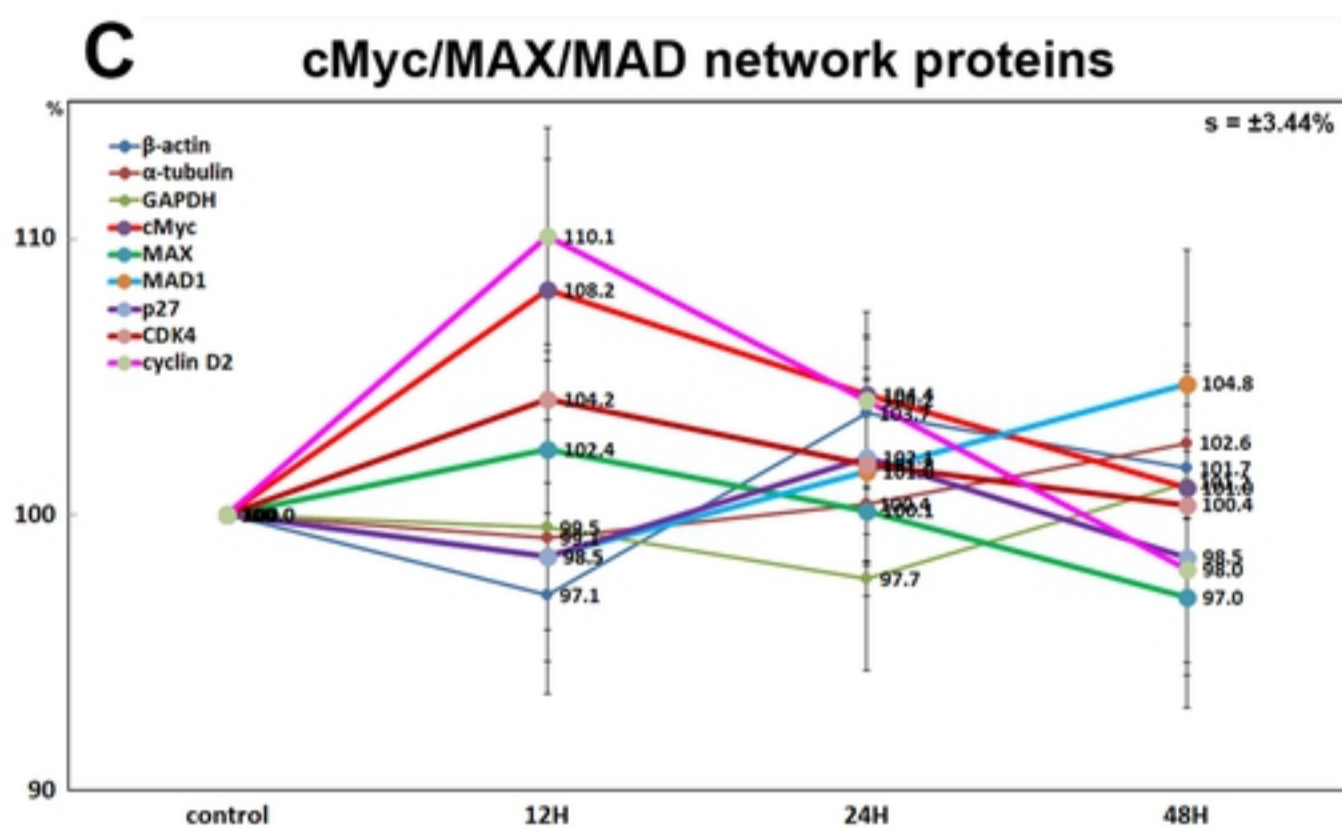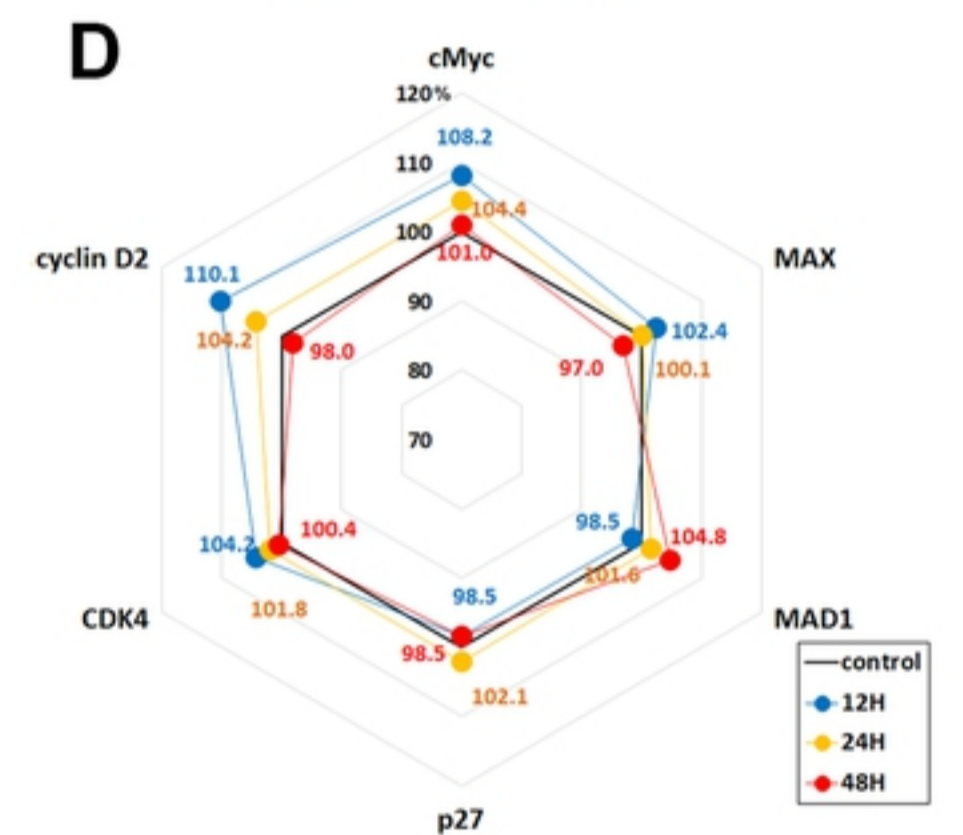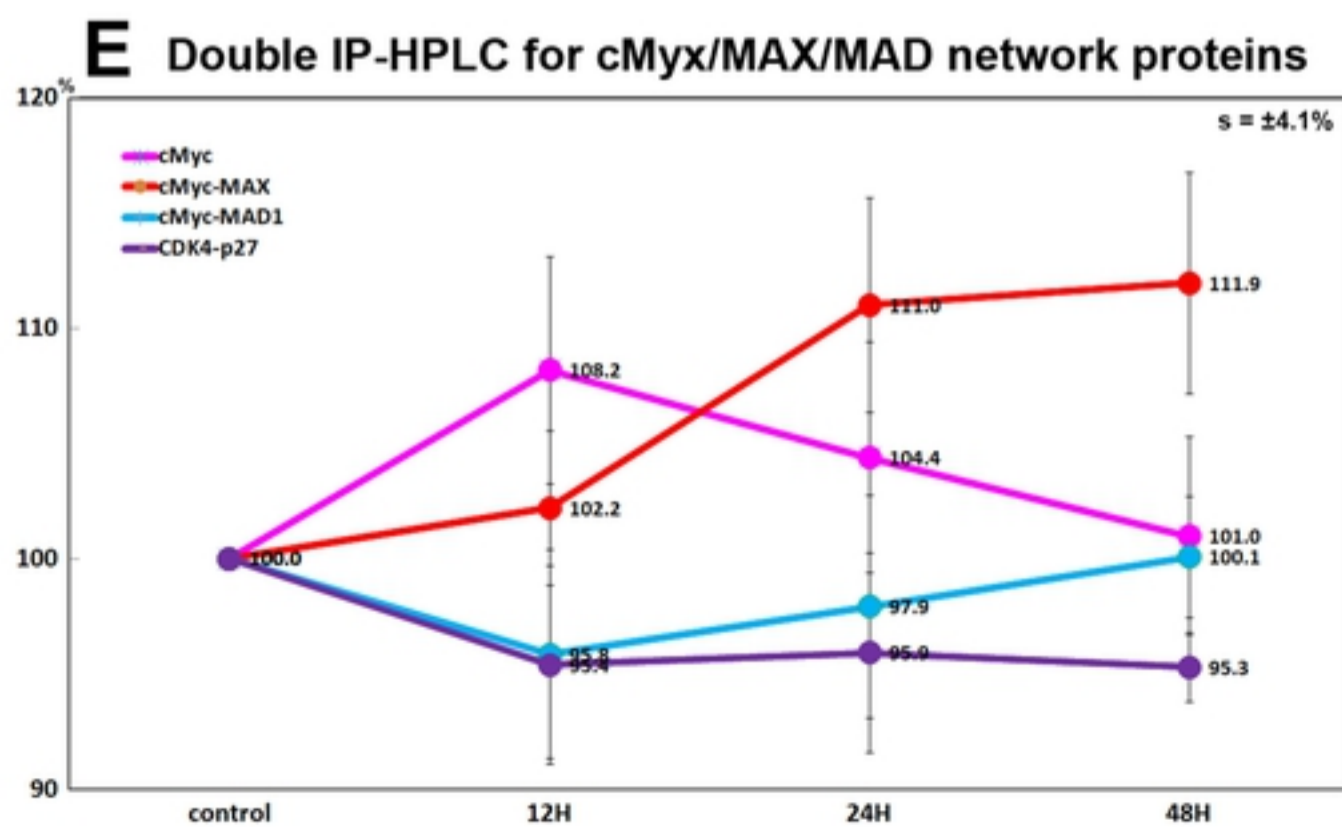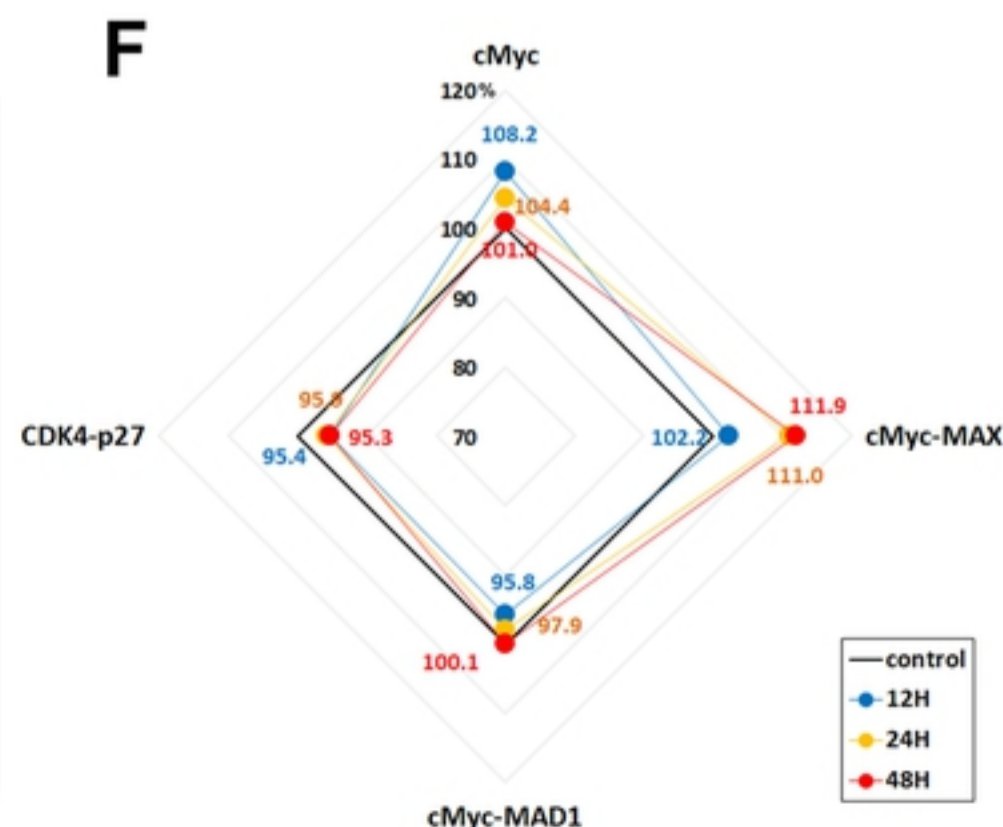

Figure 8



### A p53/Rb/E2F signaling proteins

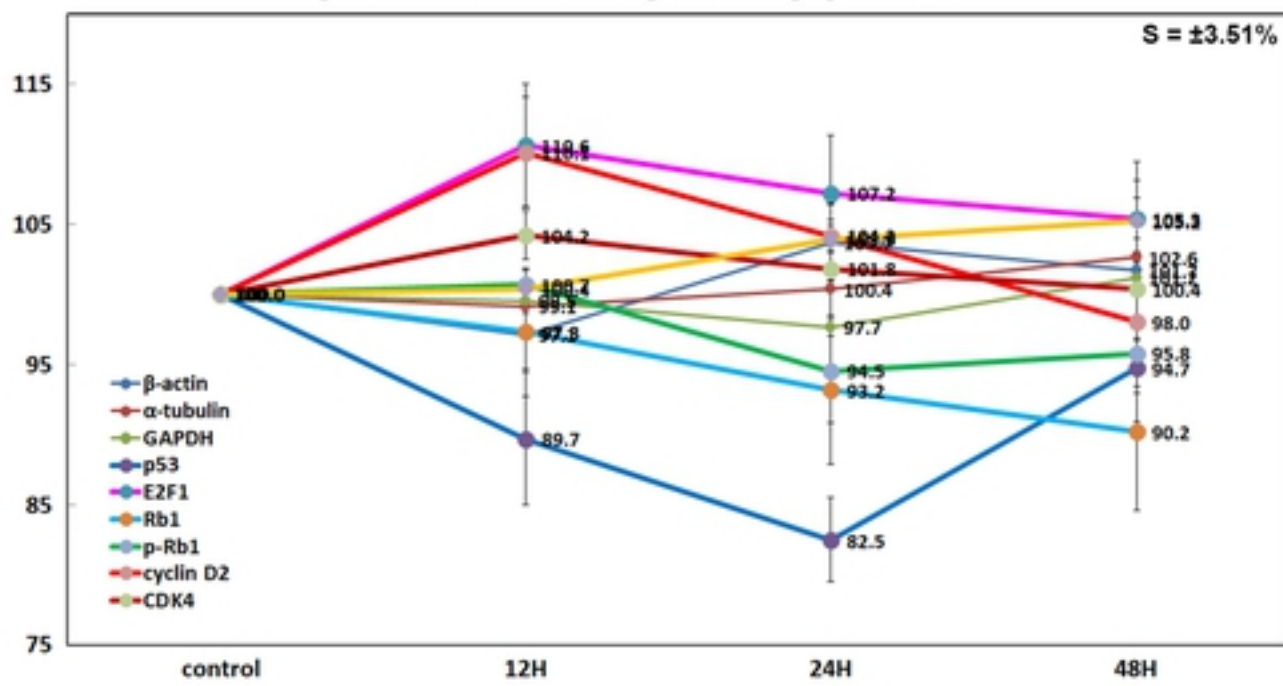

### B

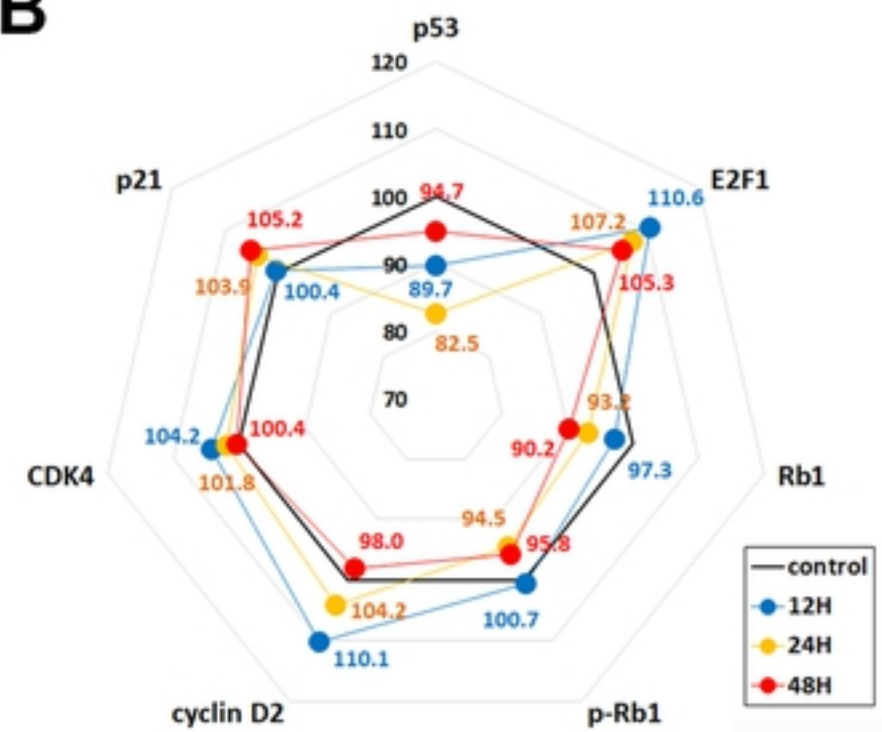

### C Double IP-HPLC for p53/Rb/E2F signaling proteins

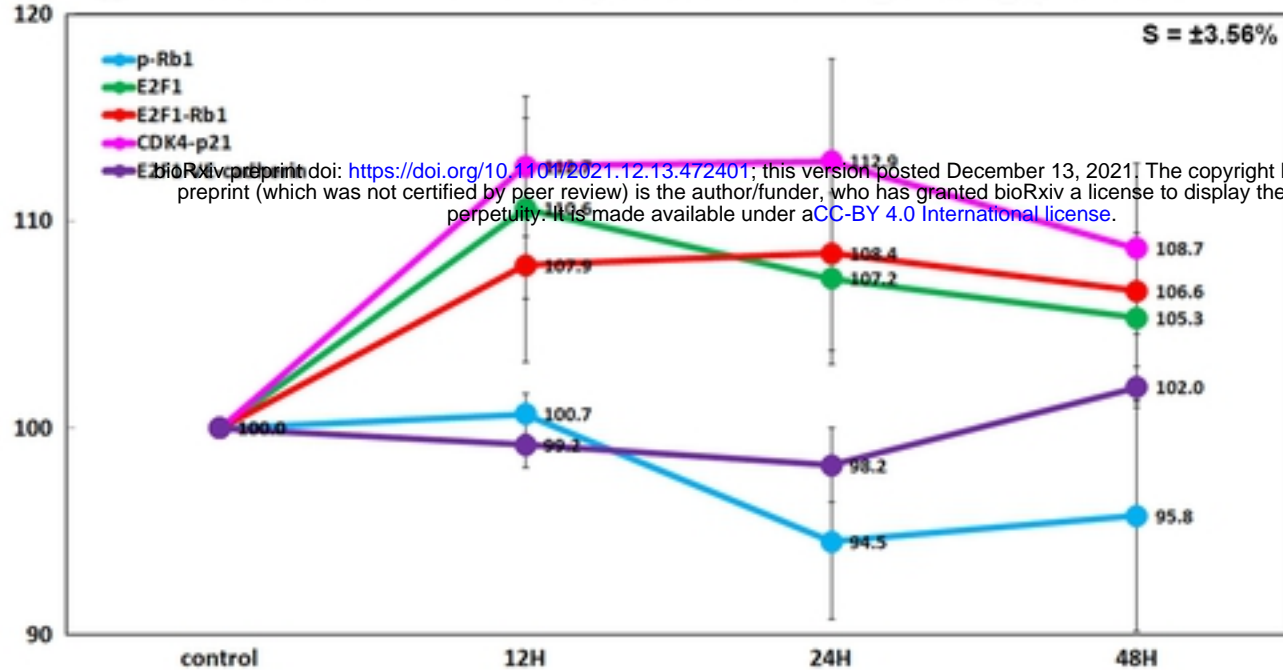

### D

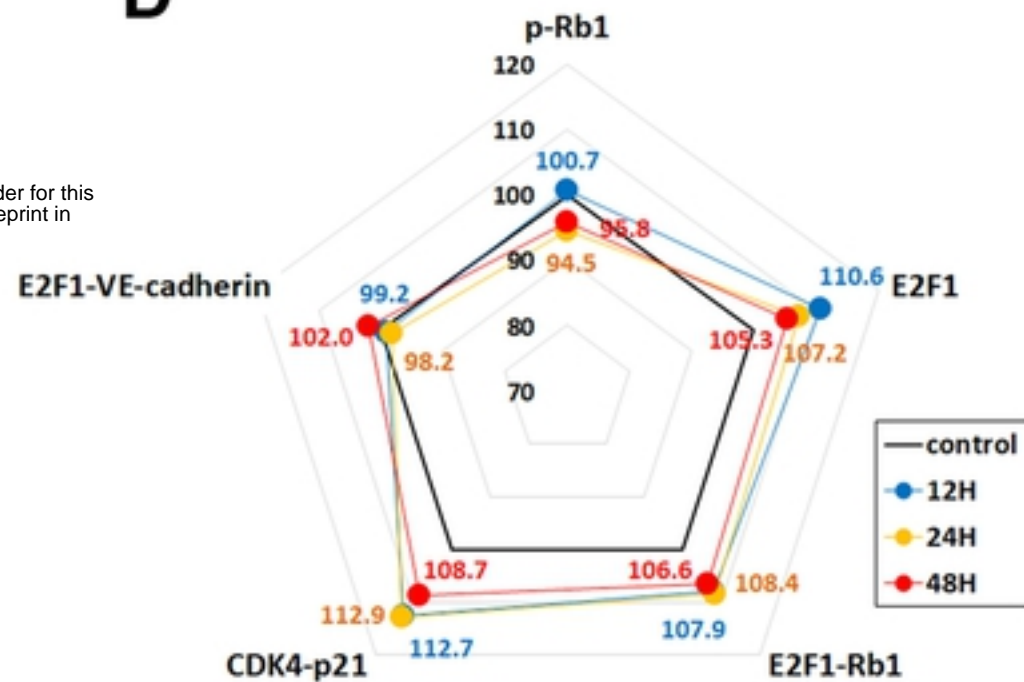

### E Wnt1/β-catenin signaling proteins

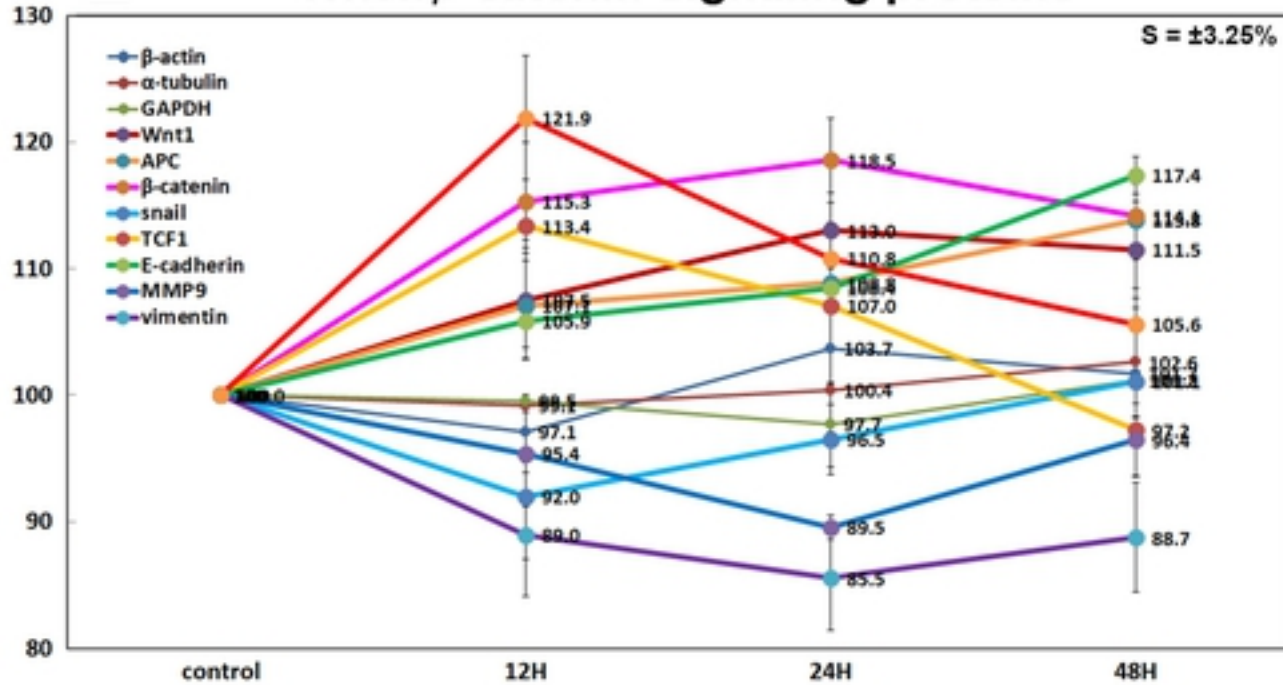

### F

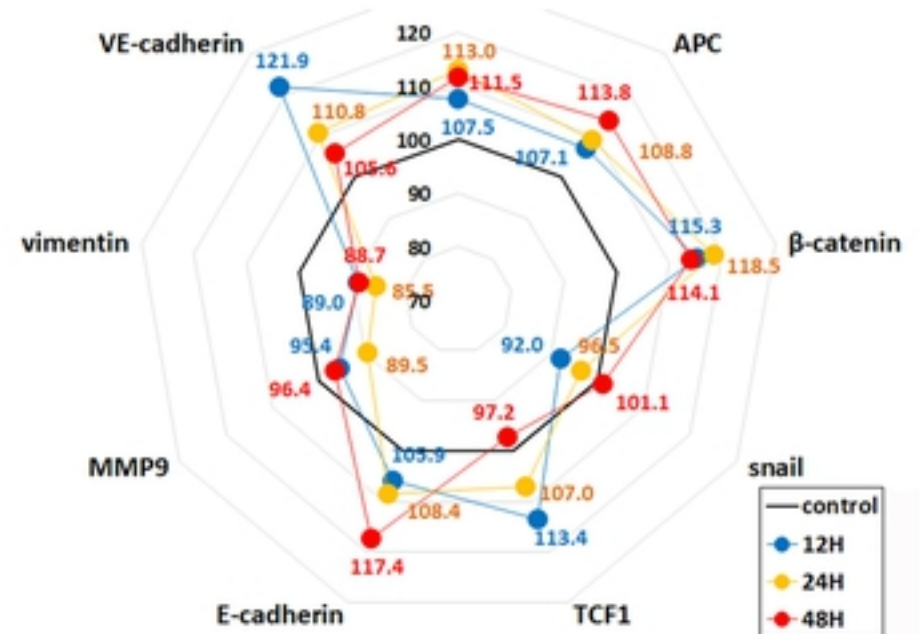

### G Double IP-HPLC for Wnt1/β-catenin signaling proteins

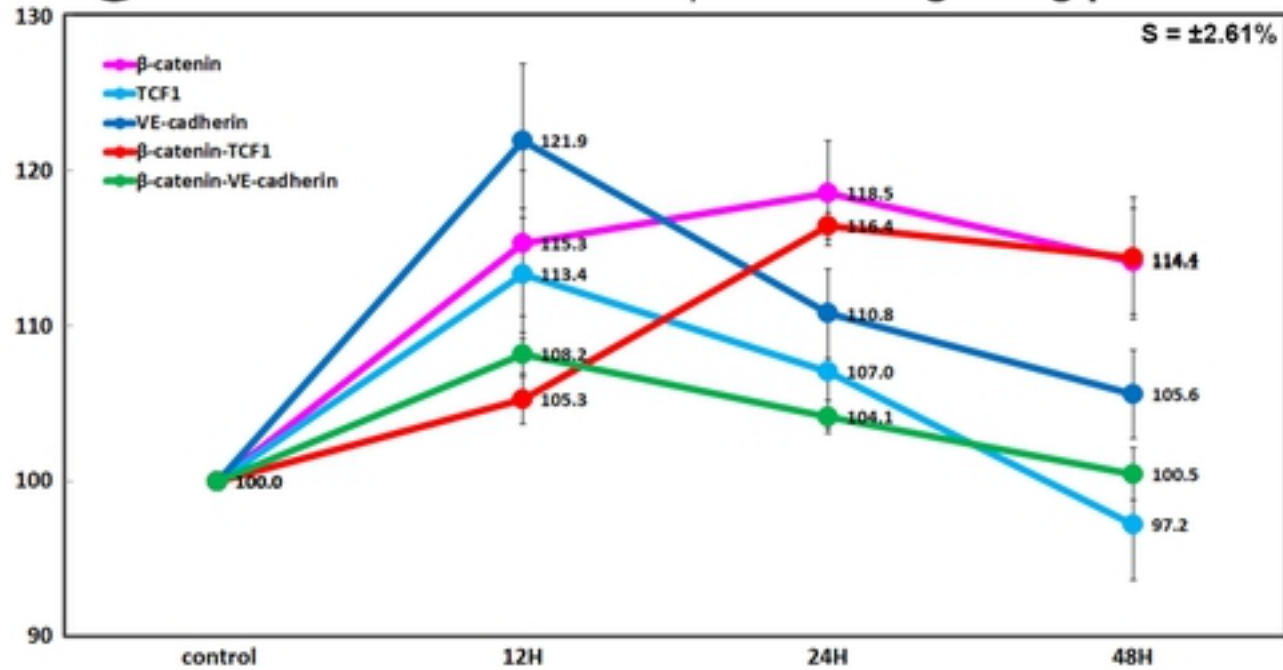

### H

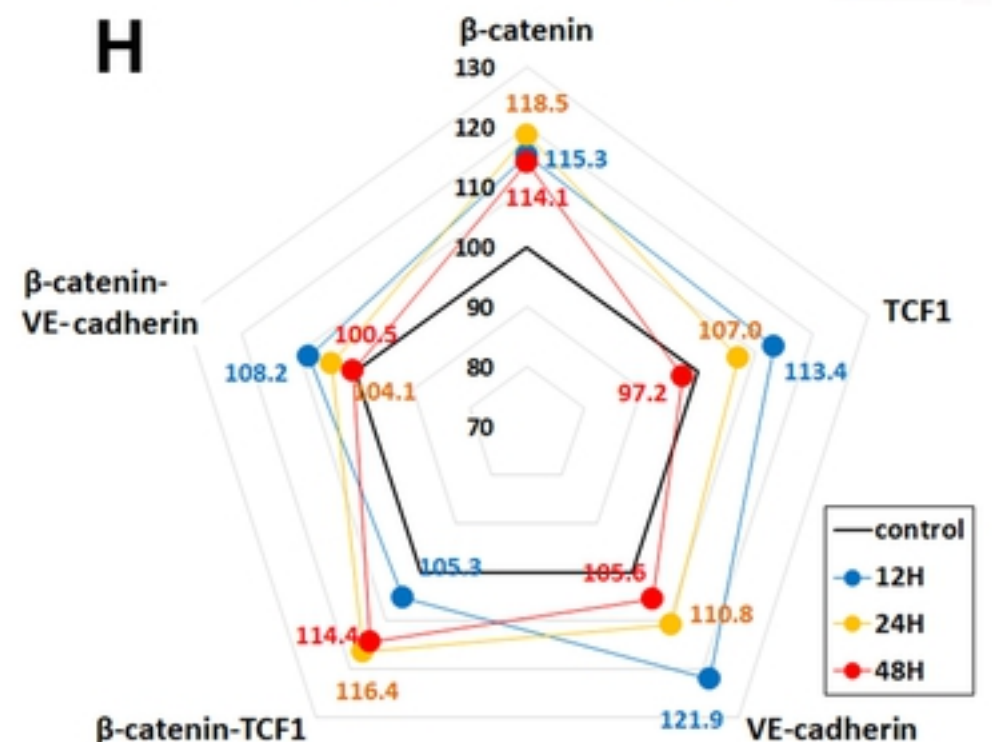

Figure 9



## A Epigenetic modification proteins

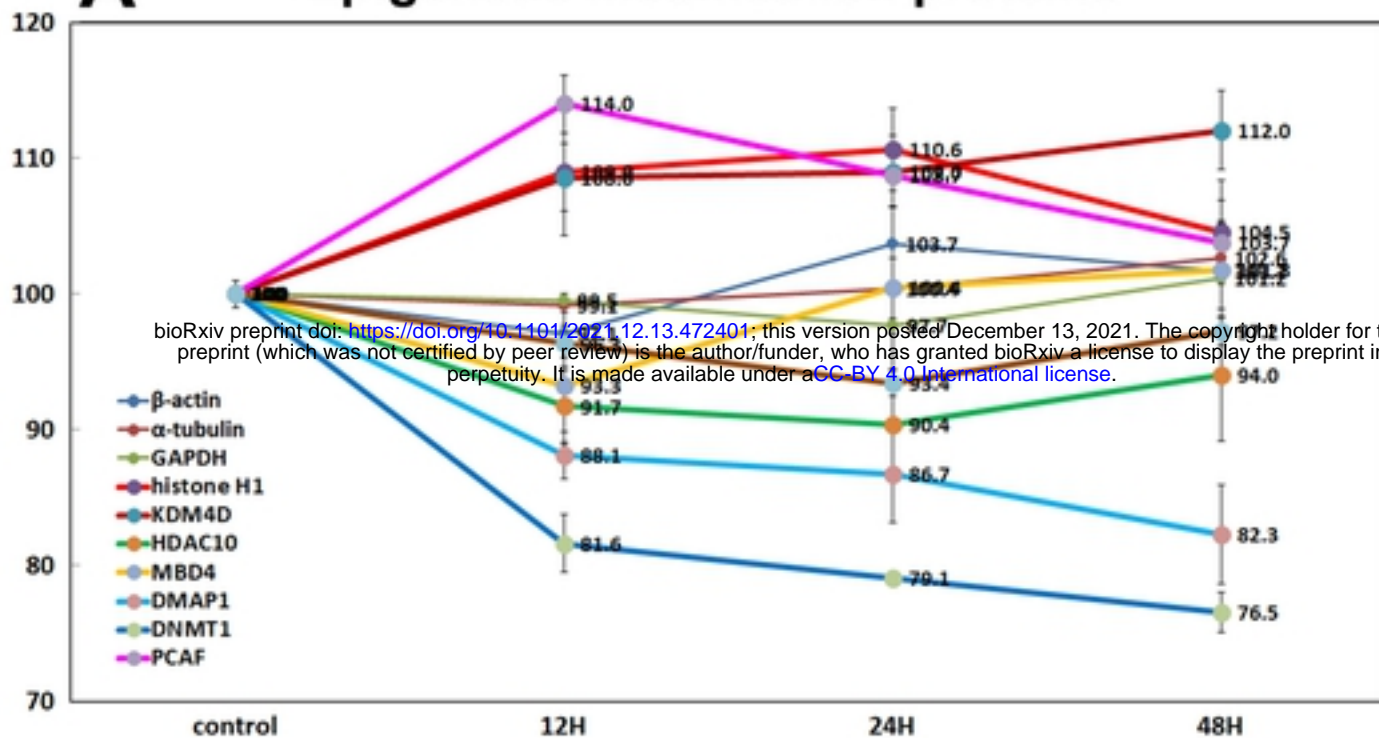

## B

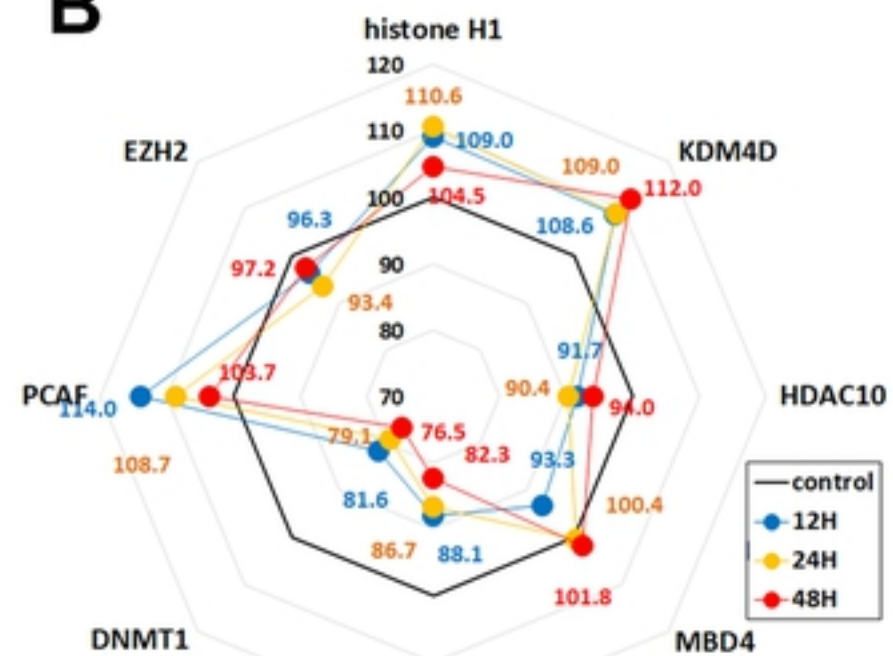

## C Protein translation proteins

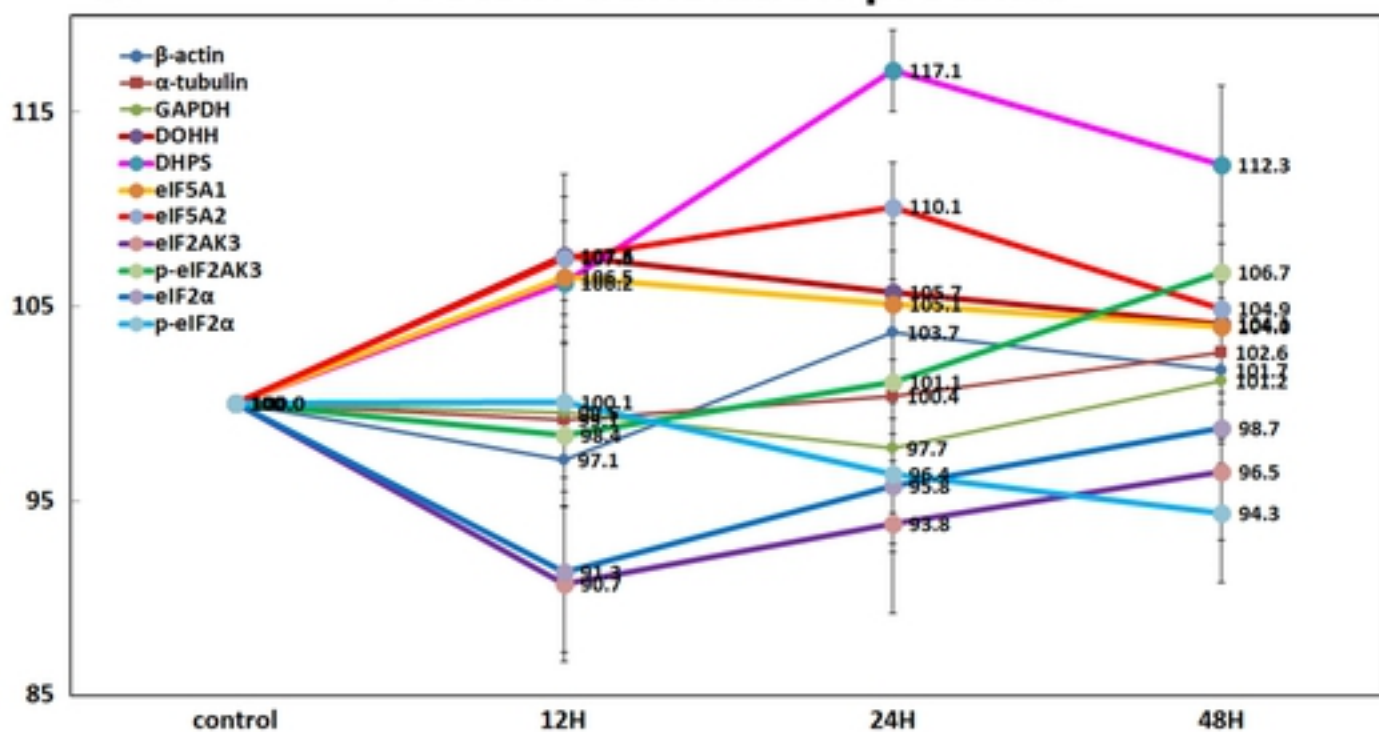

## D

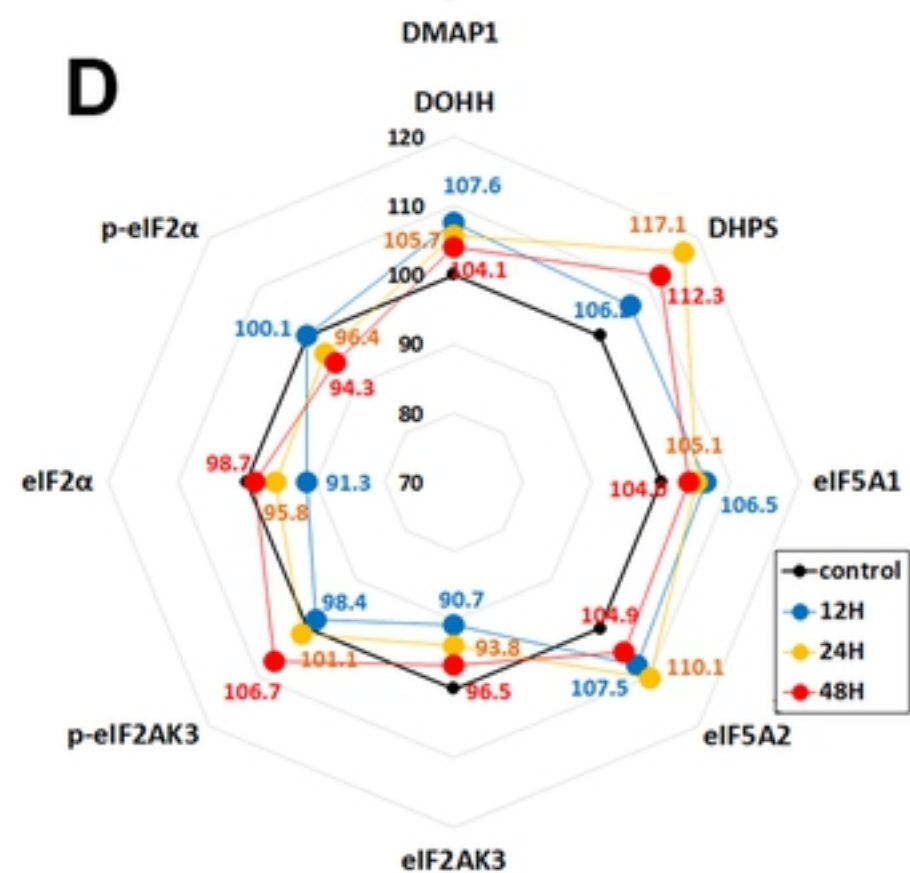

## E Growth factors

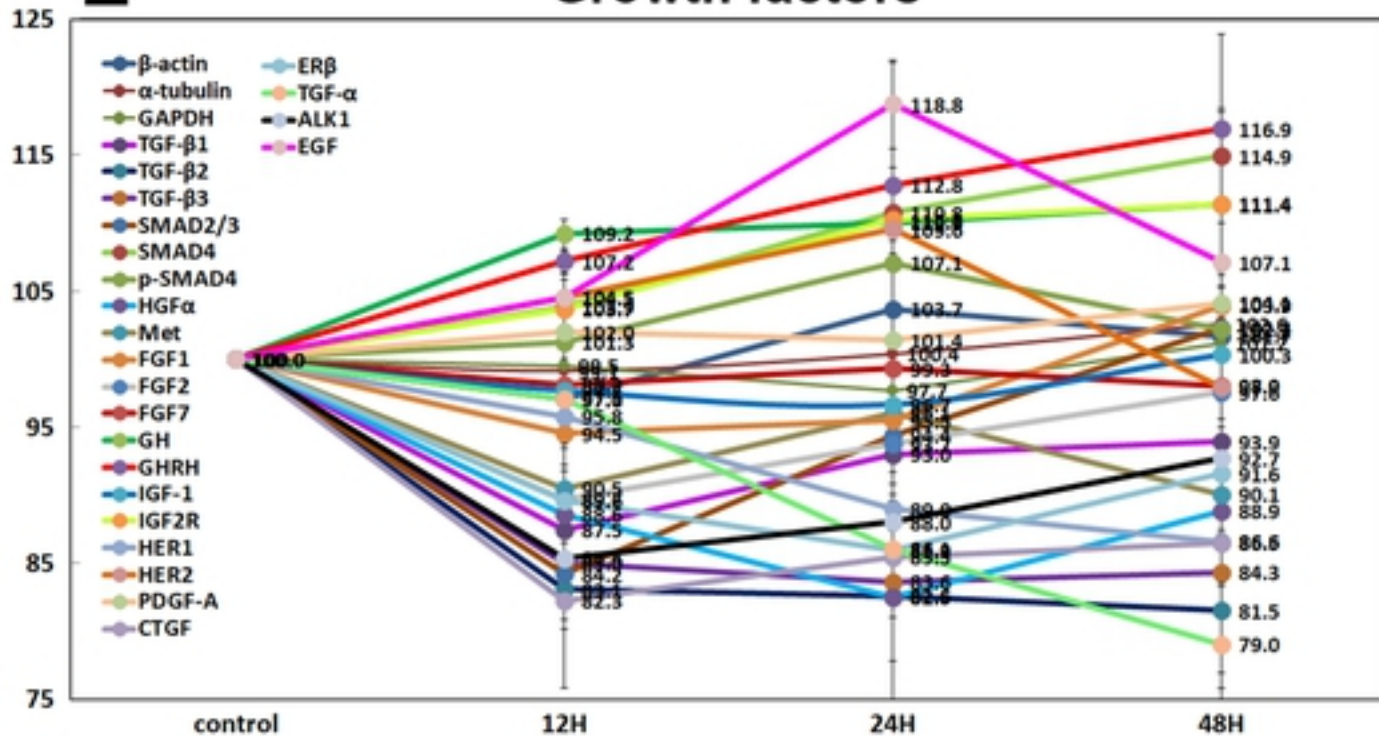

## F

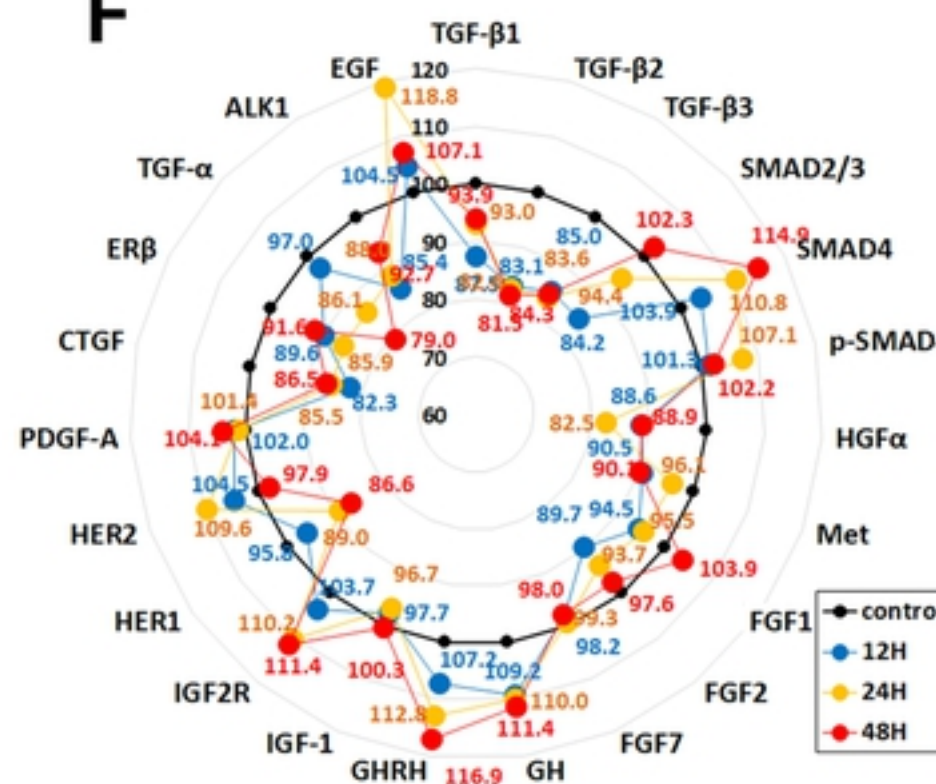

Figure 10



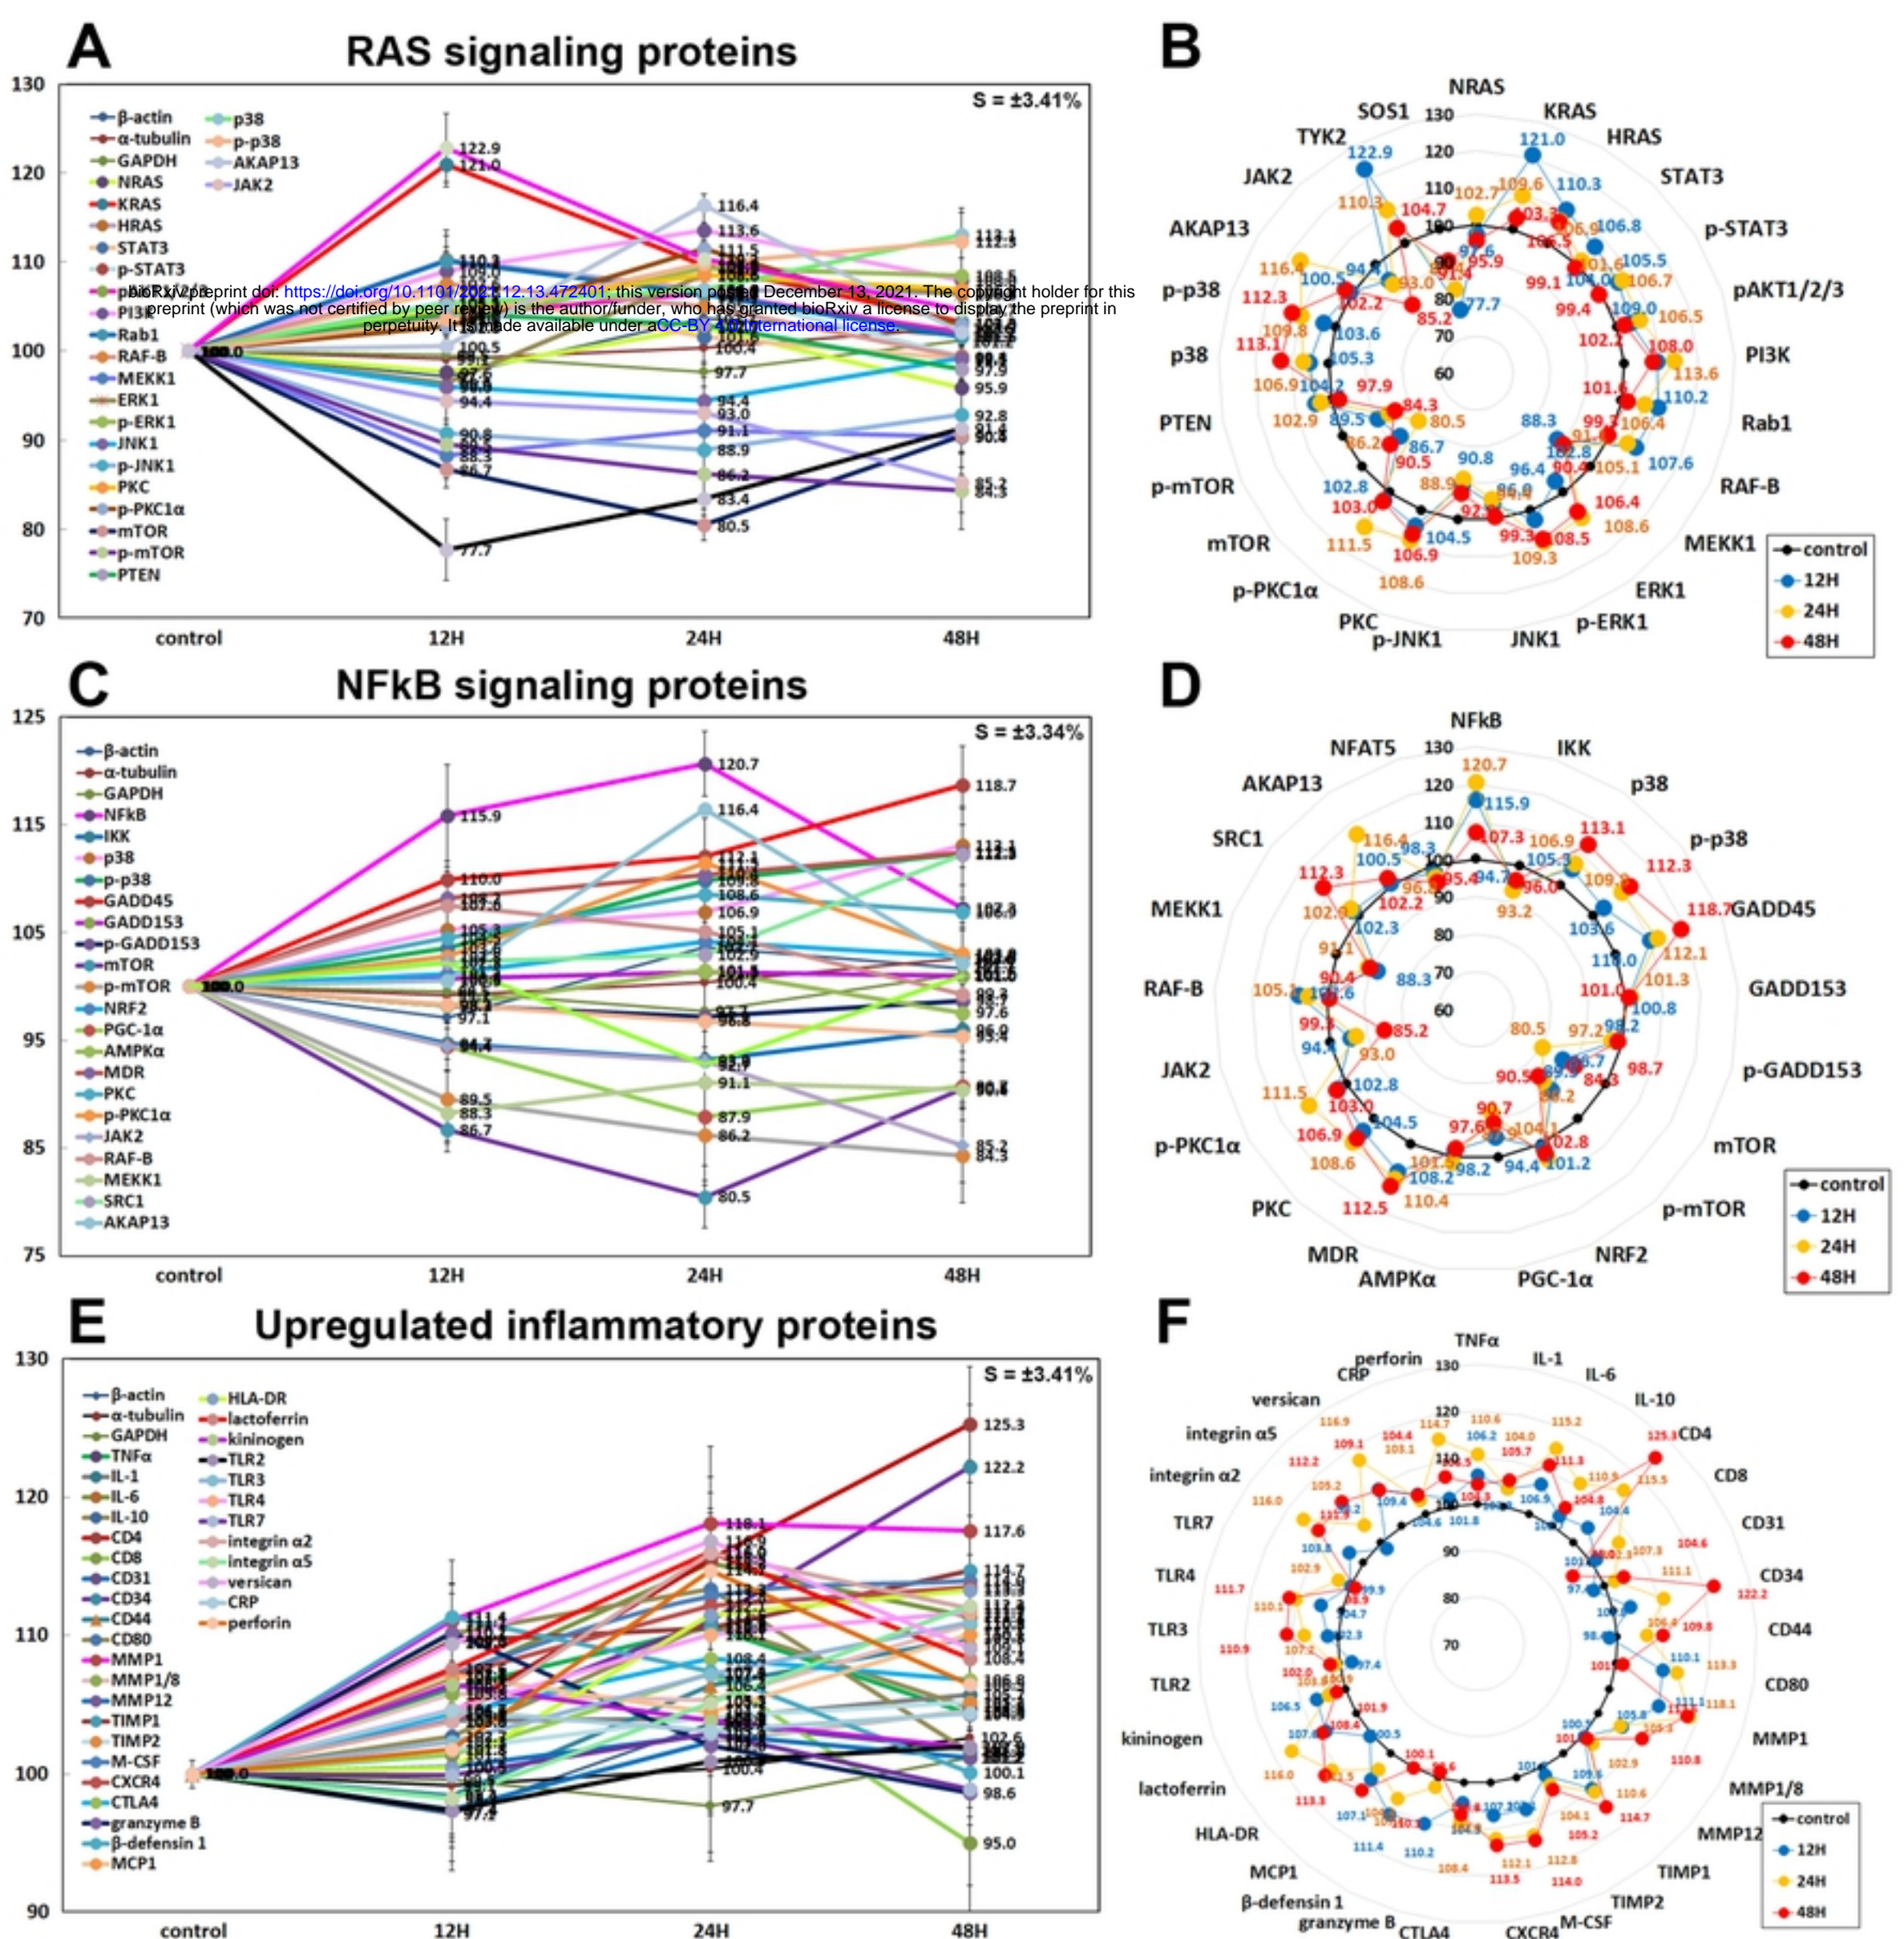

Figure 11



### A Downregulated inflammatory proteins

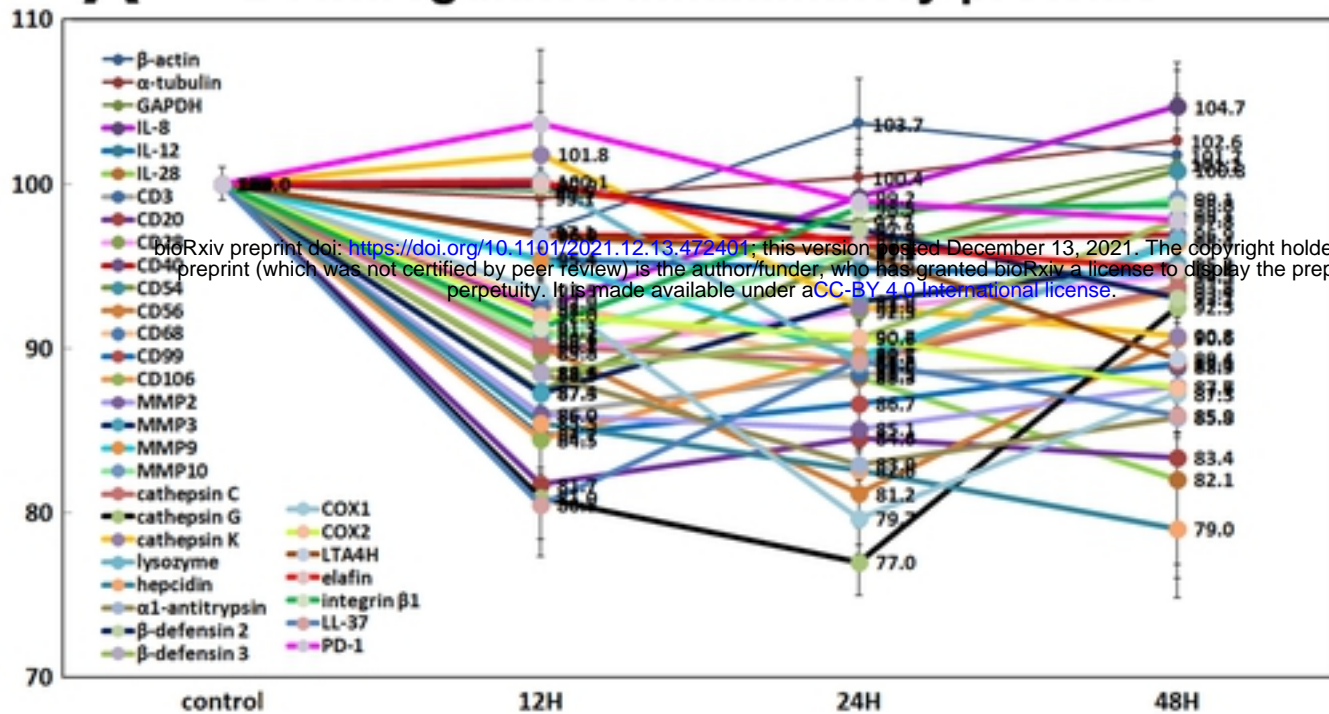

### B

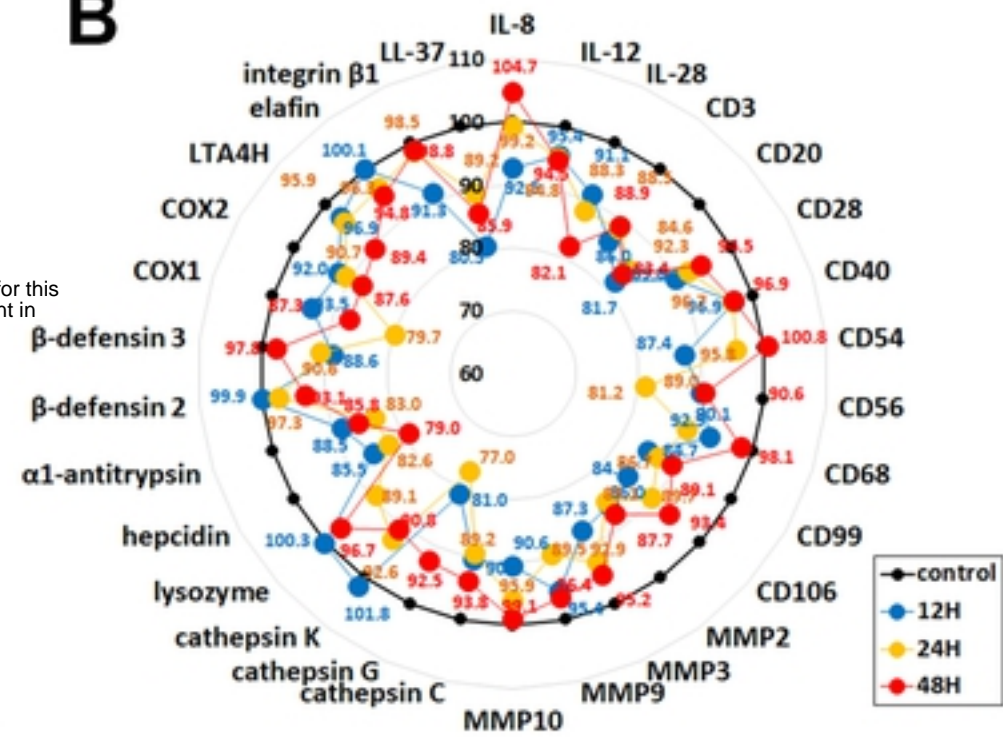

### C p53-mediated apoptosis proteins

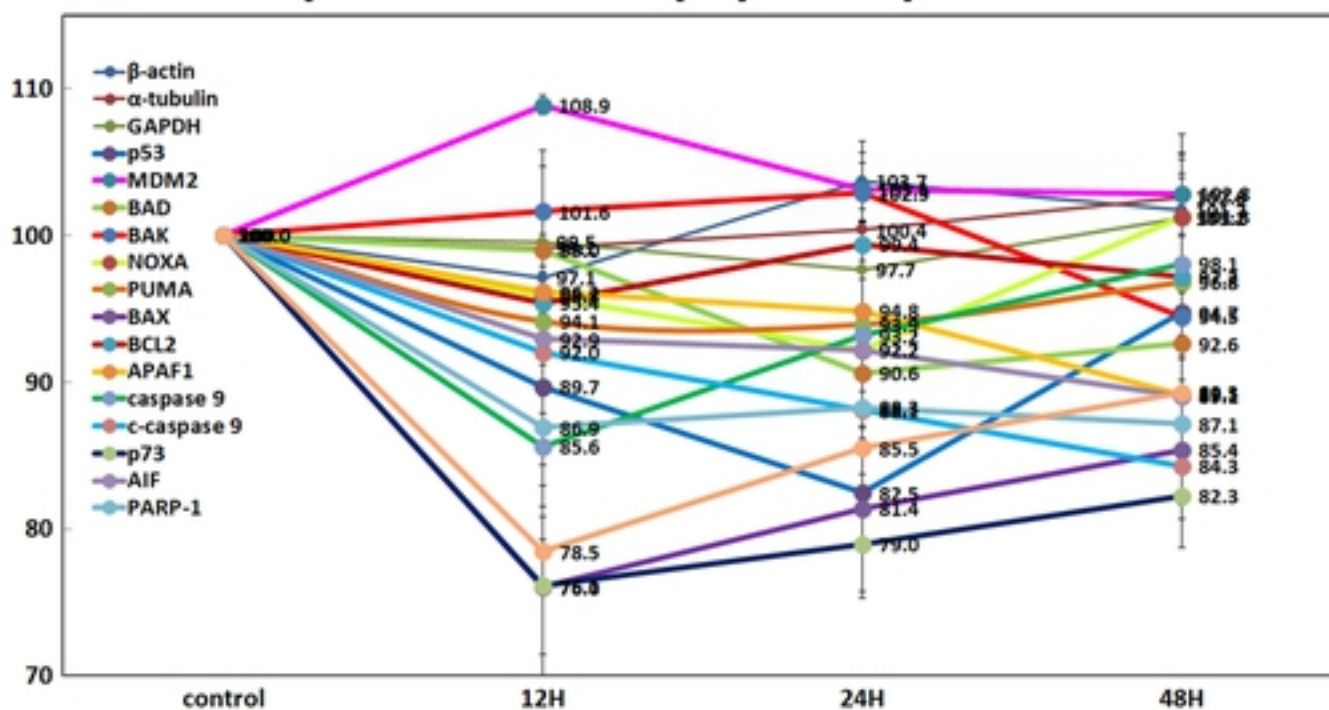

### D

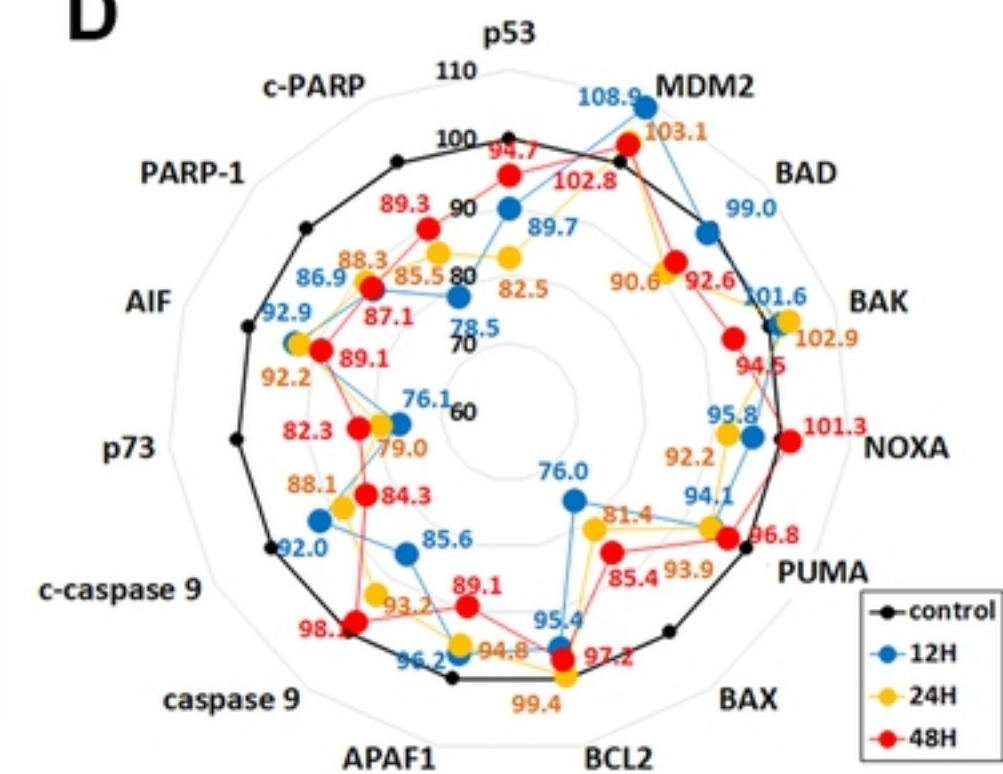

### E FAS-mediated apoptosis proteins

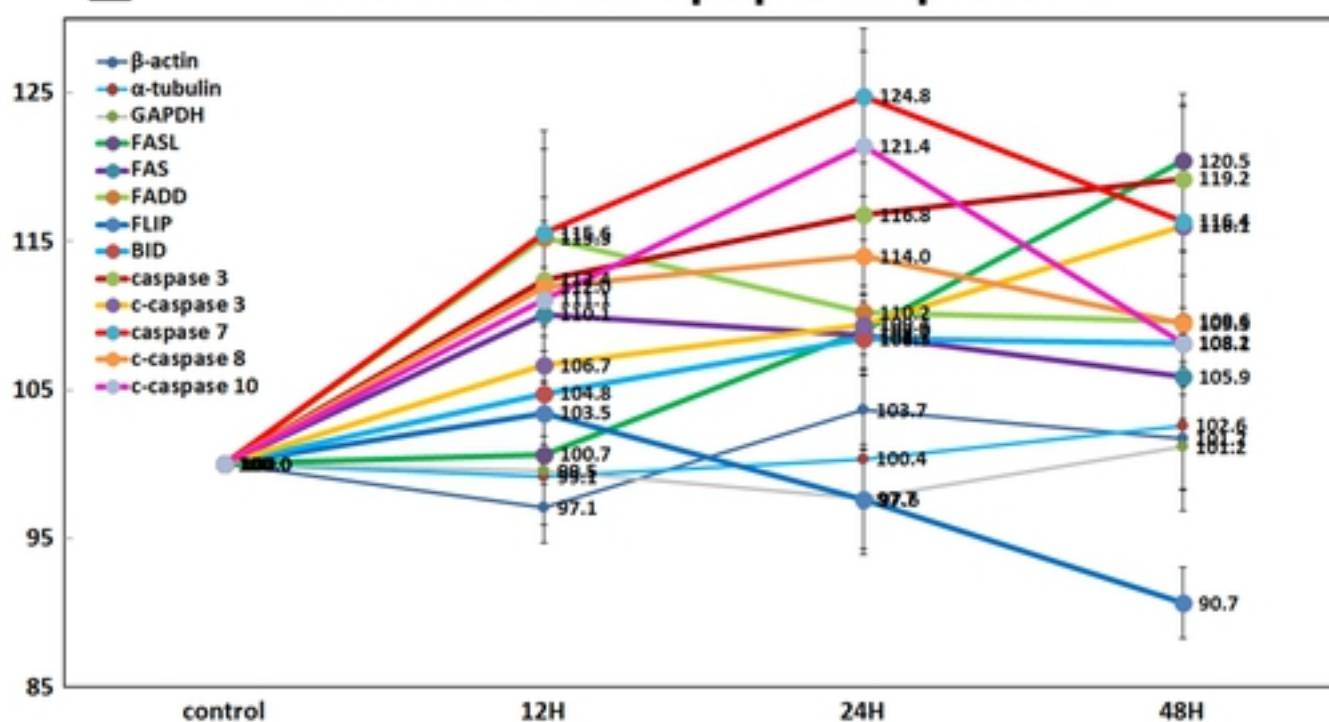

### F

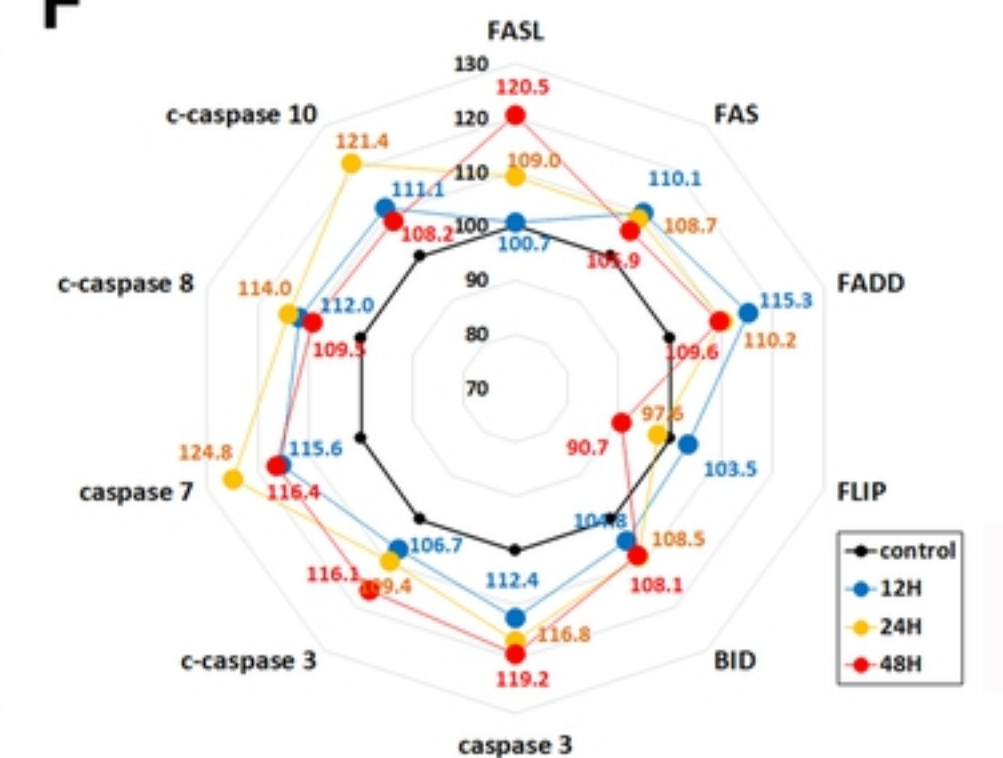

Figure 12



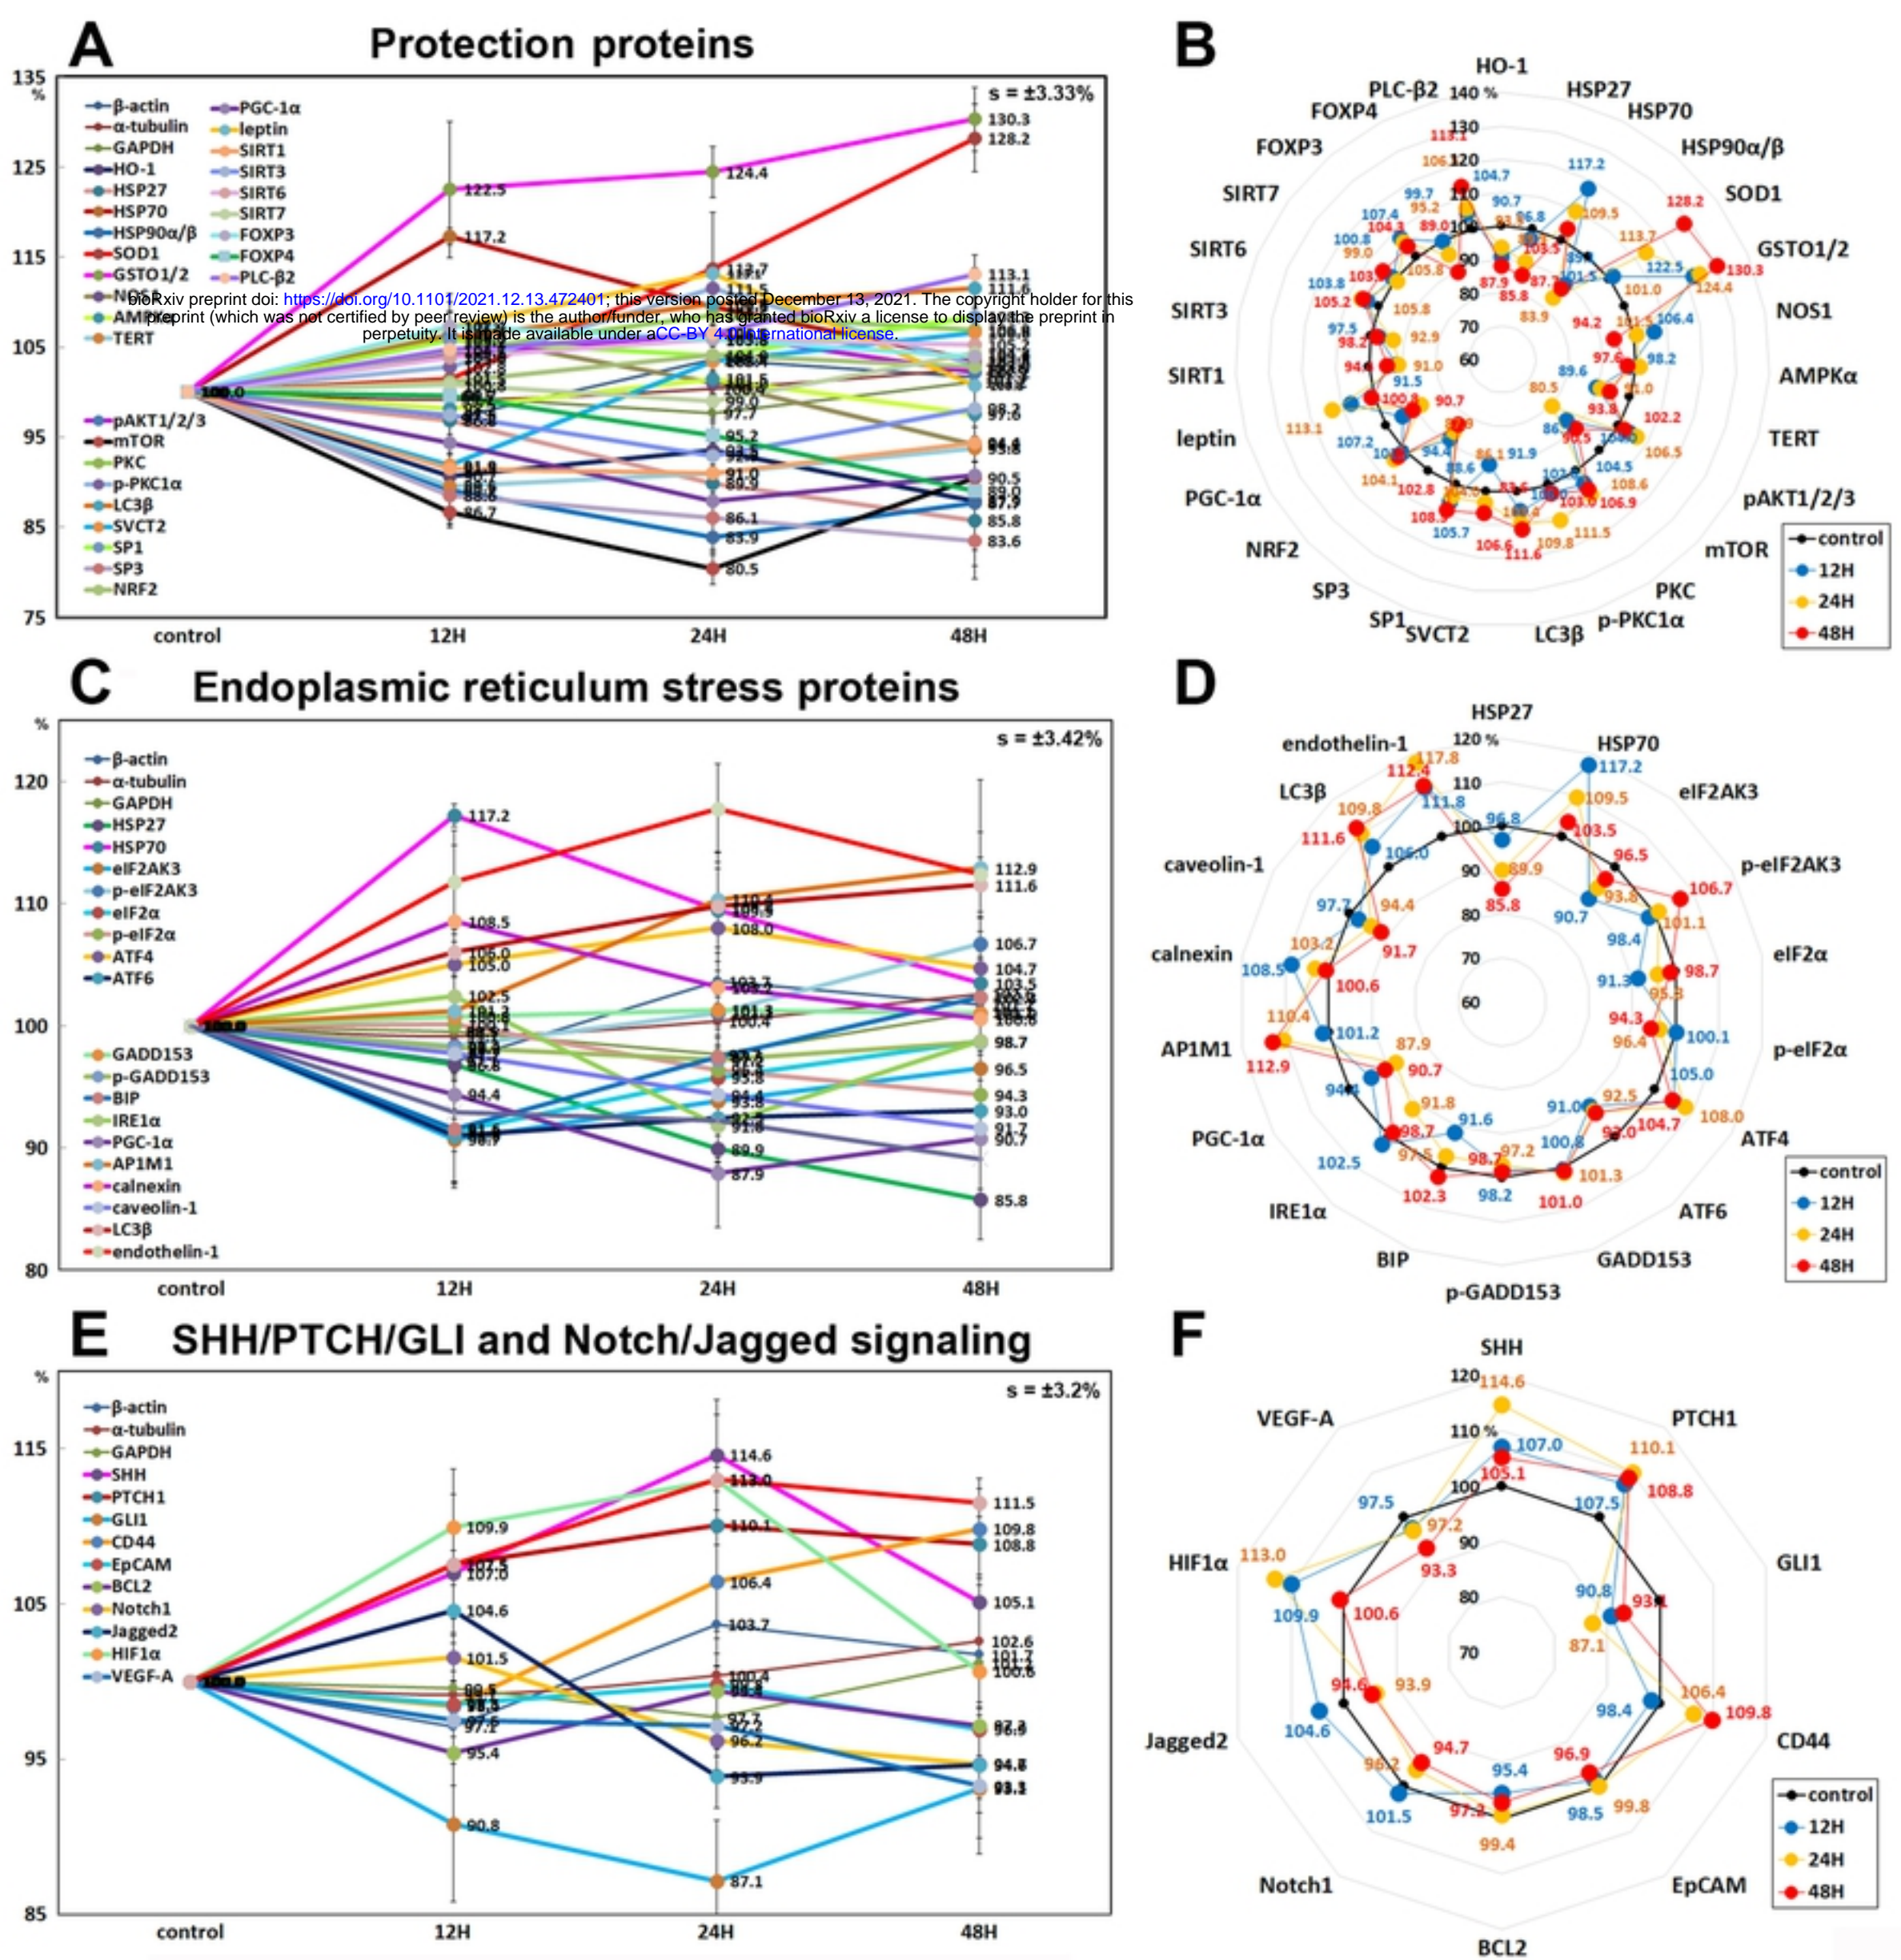

Figure 13



## A Cytodifferentiation proteins

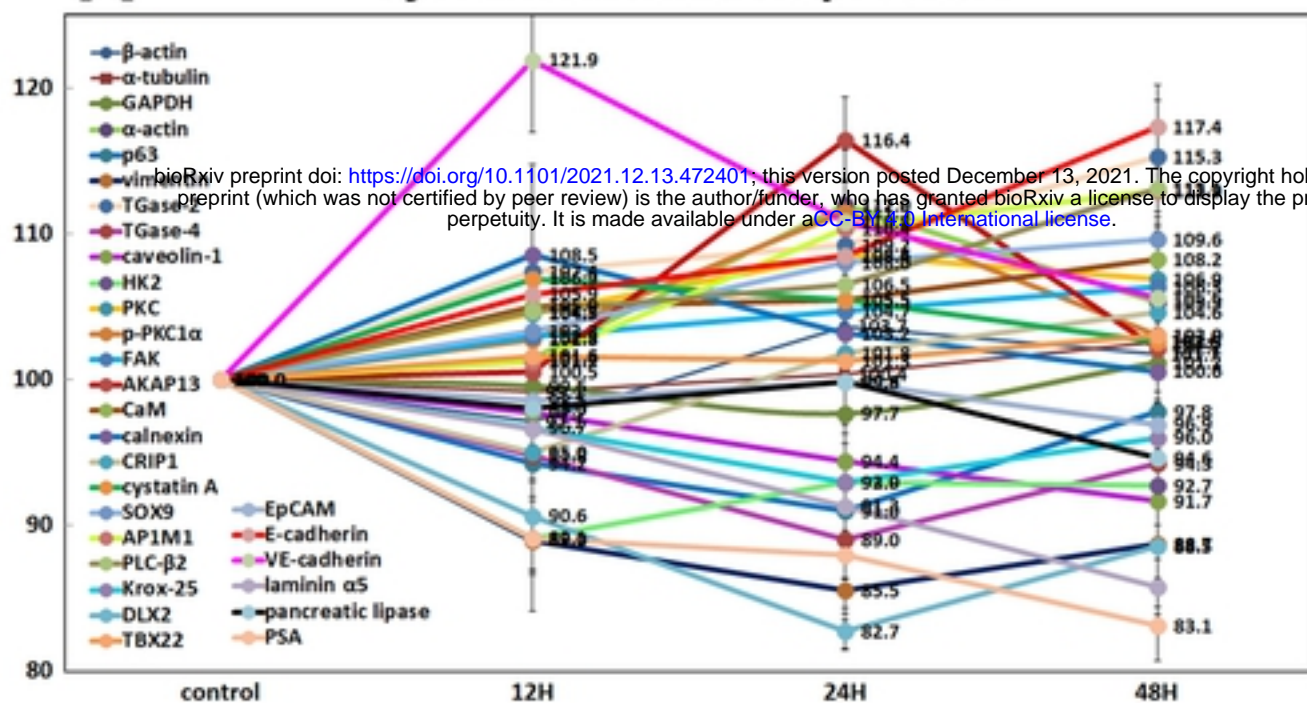

## B

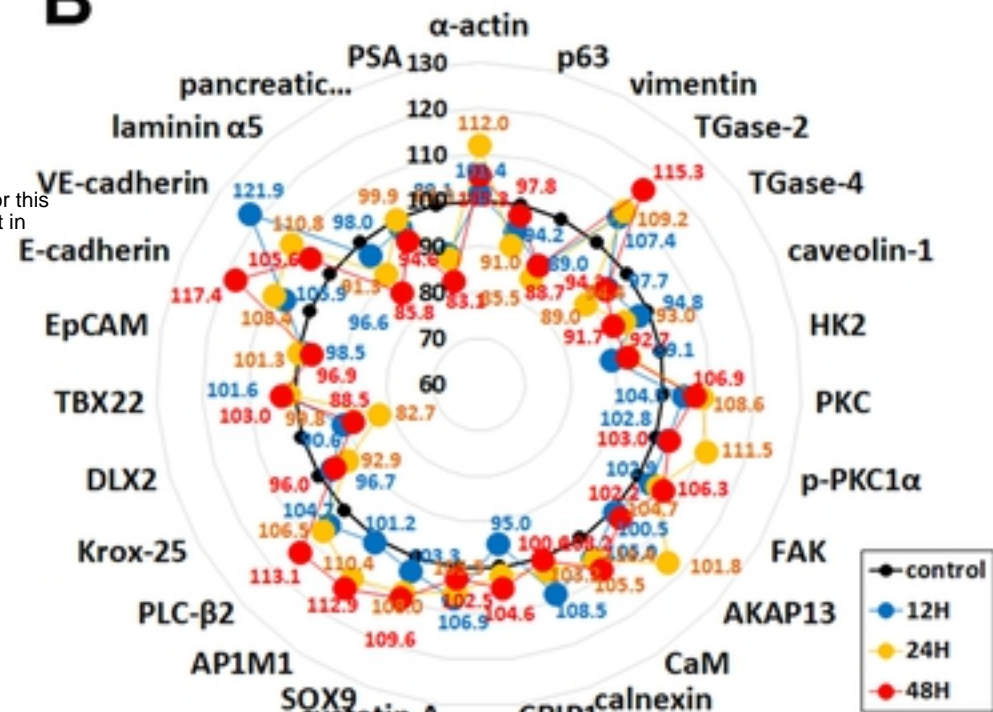

## C Neuromuscular differentiation proteins

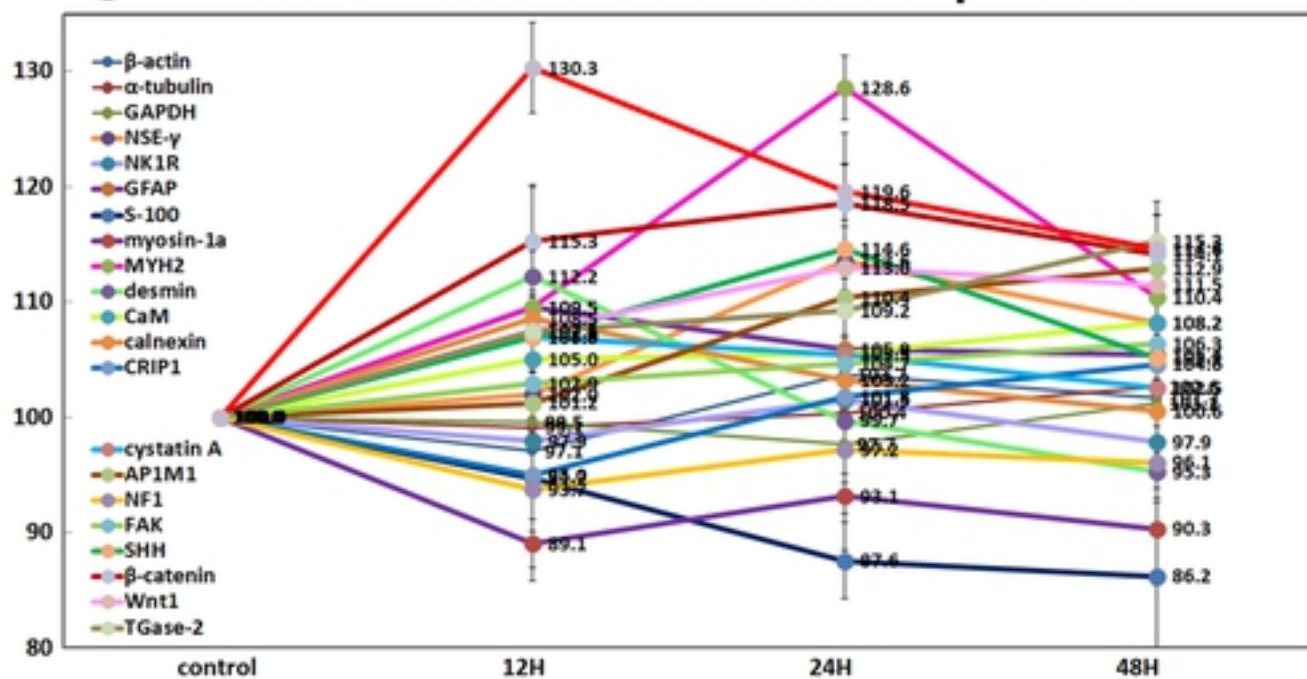

## D

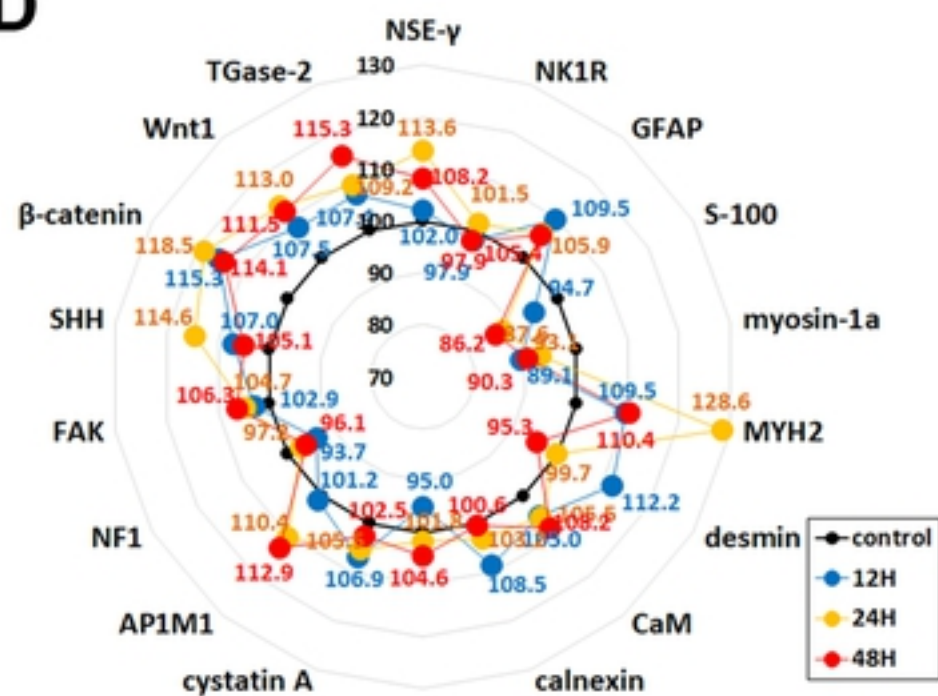

## E Fibrosis proteins

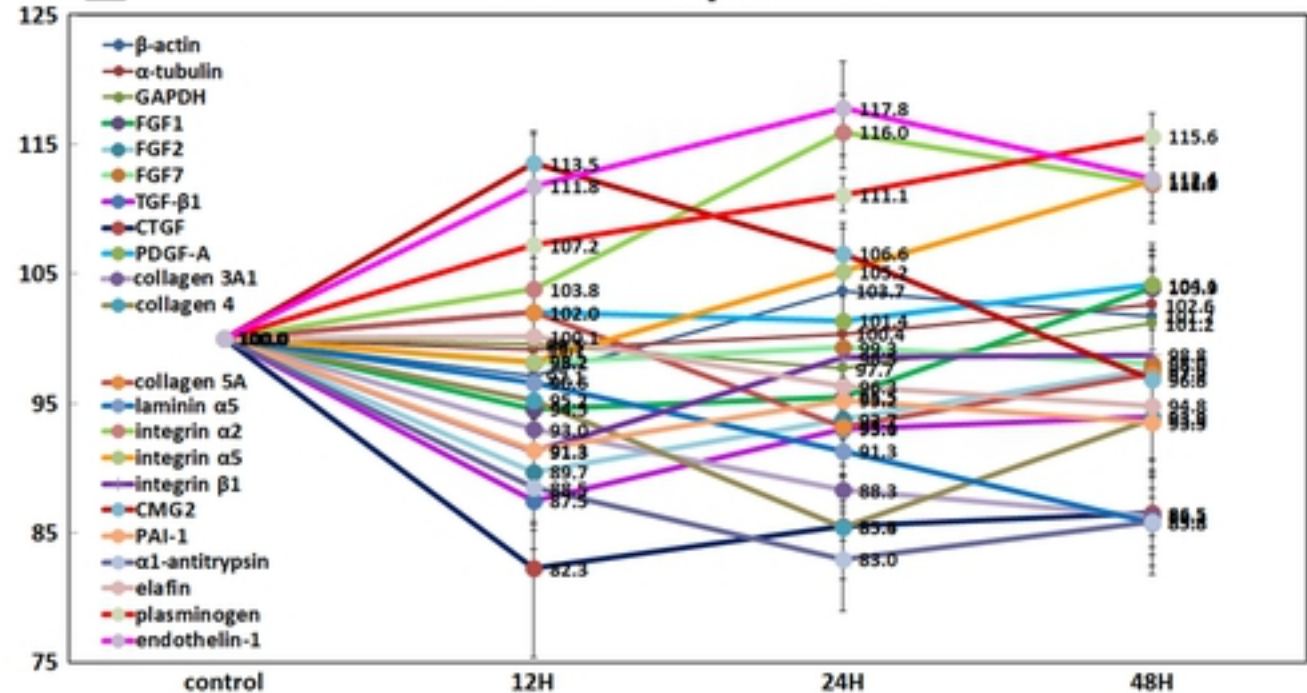

## F

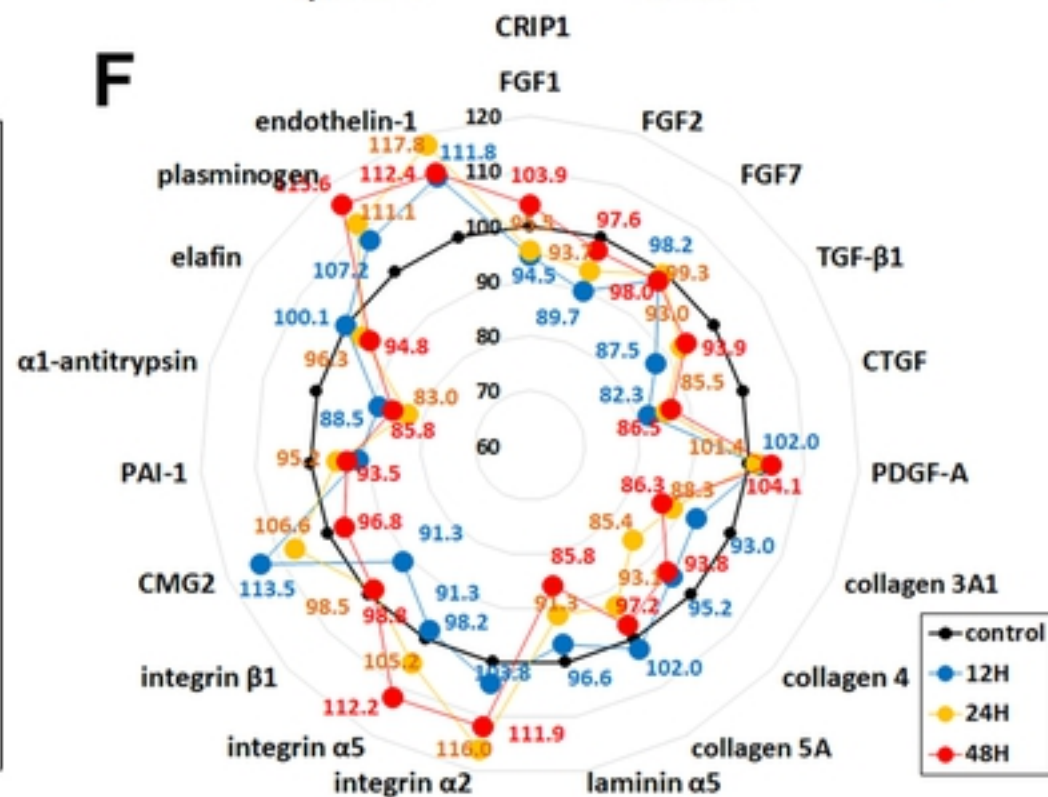

Figure 14



## A Oncogenesis proteins

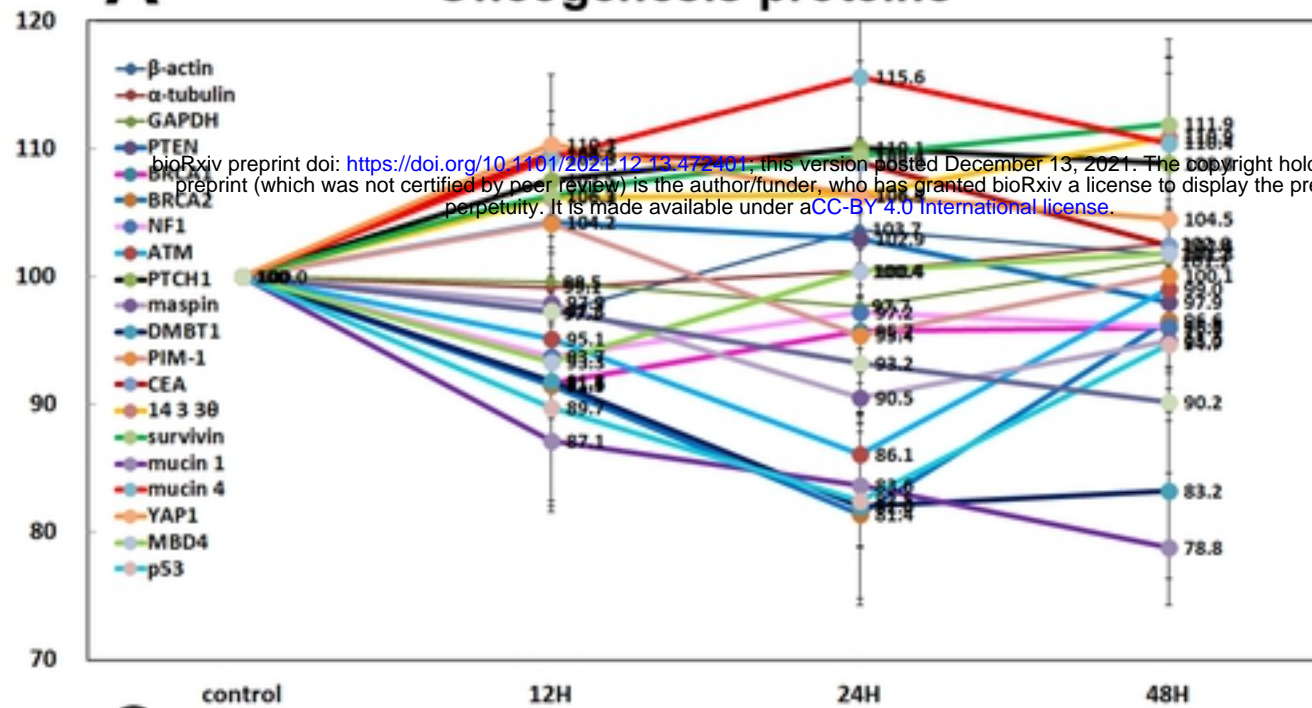

## B

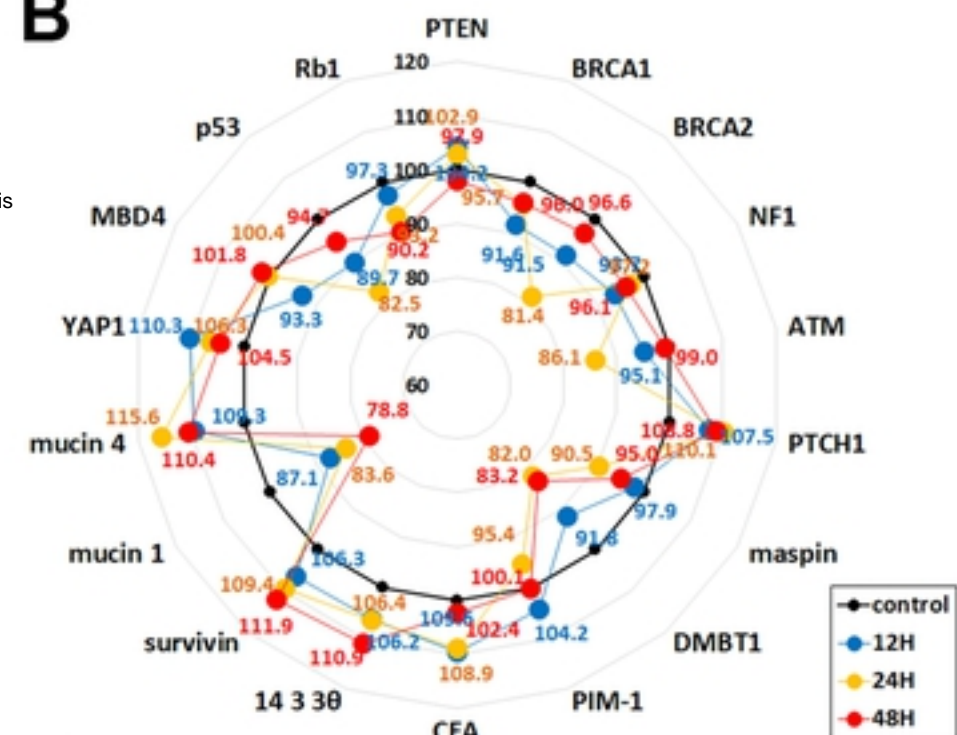

## C Angiogenesis proteins

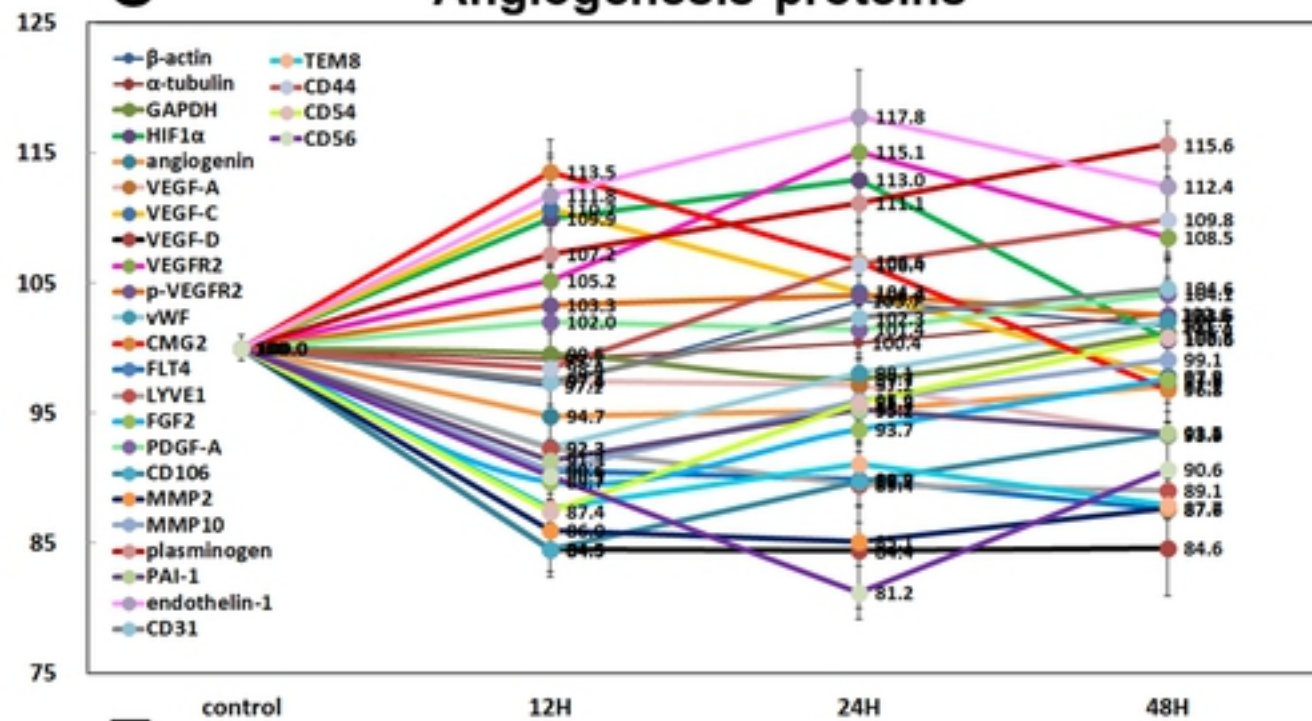

## D

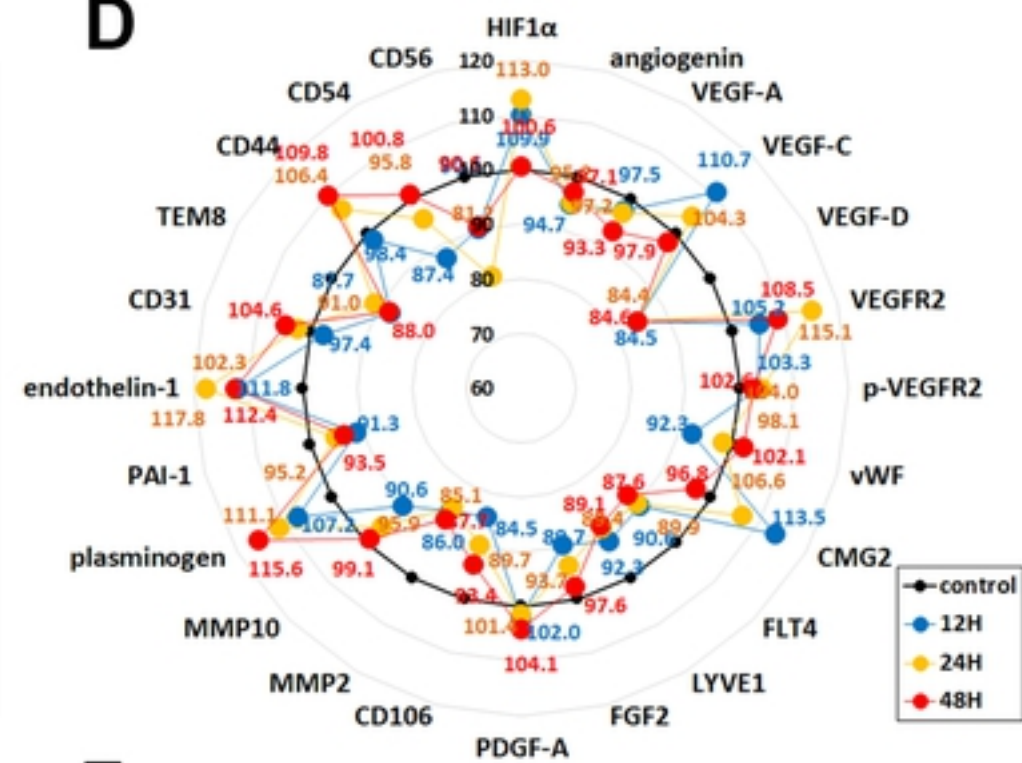

## E Osteogenesis proteins

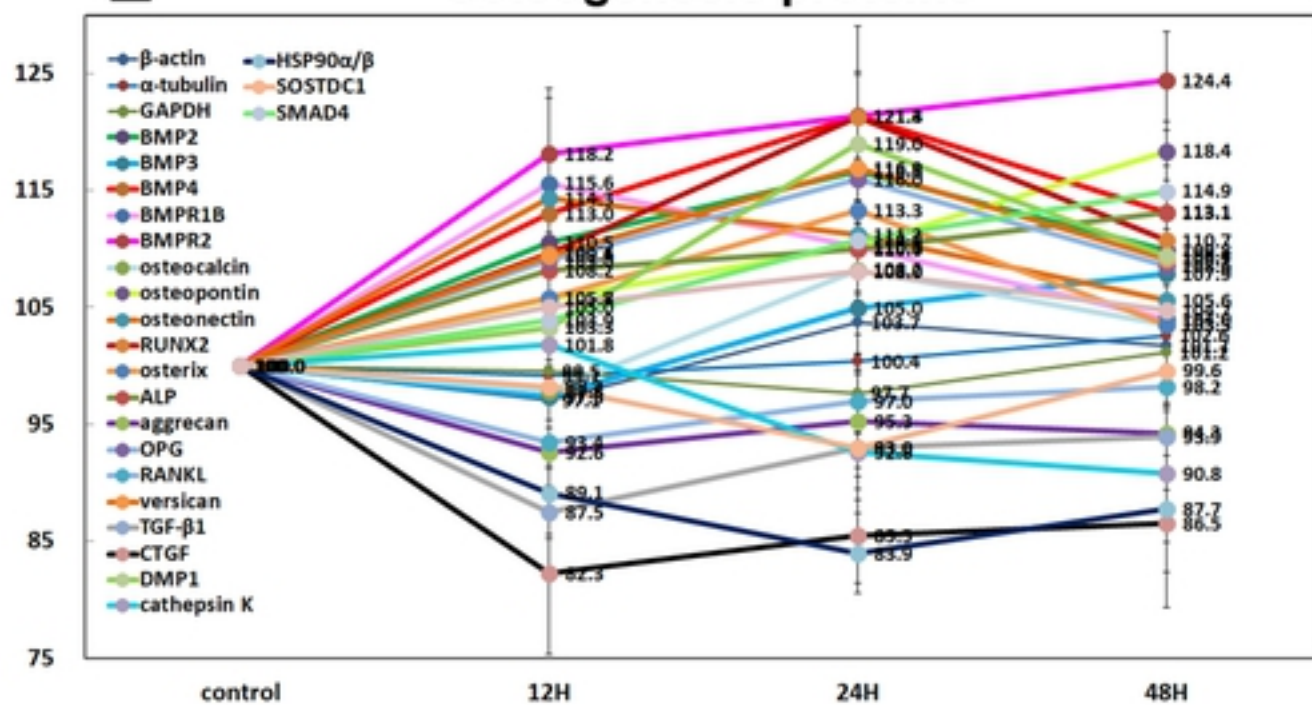

## F

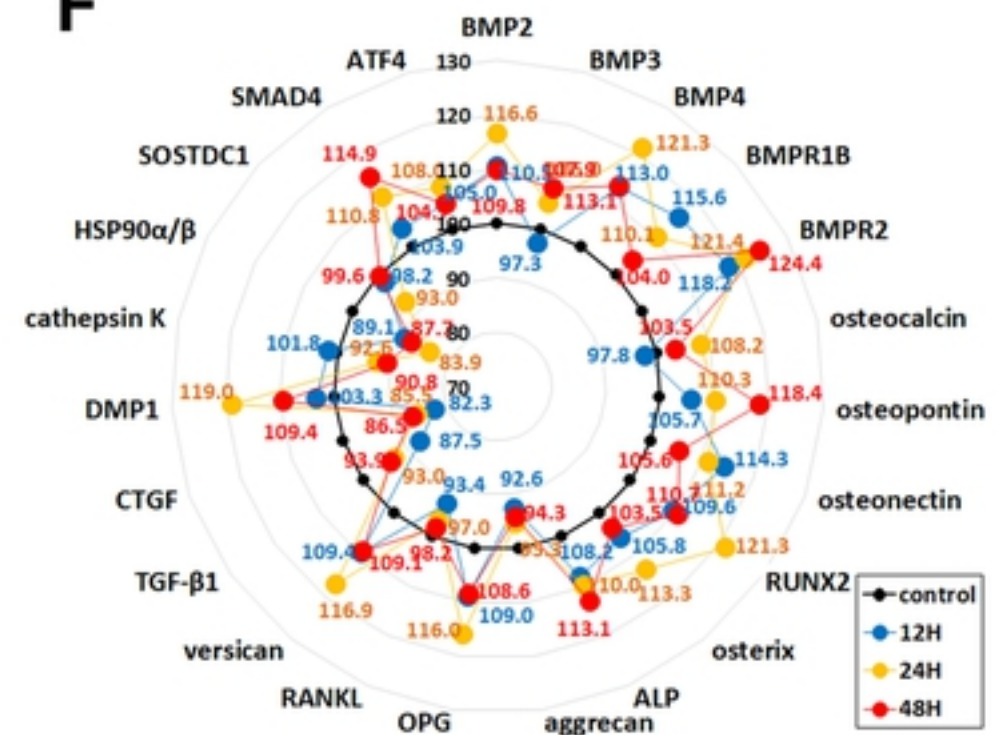

Figure 15



→control  
 ● Maximum expressions (upregulated proteins)  
 ● Minimum expressions (downregulated proteins)  
 S = ±3.12%

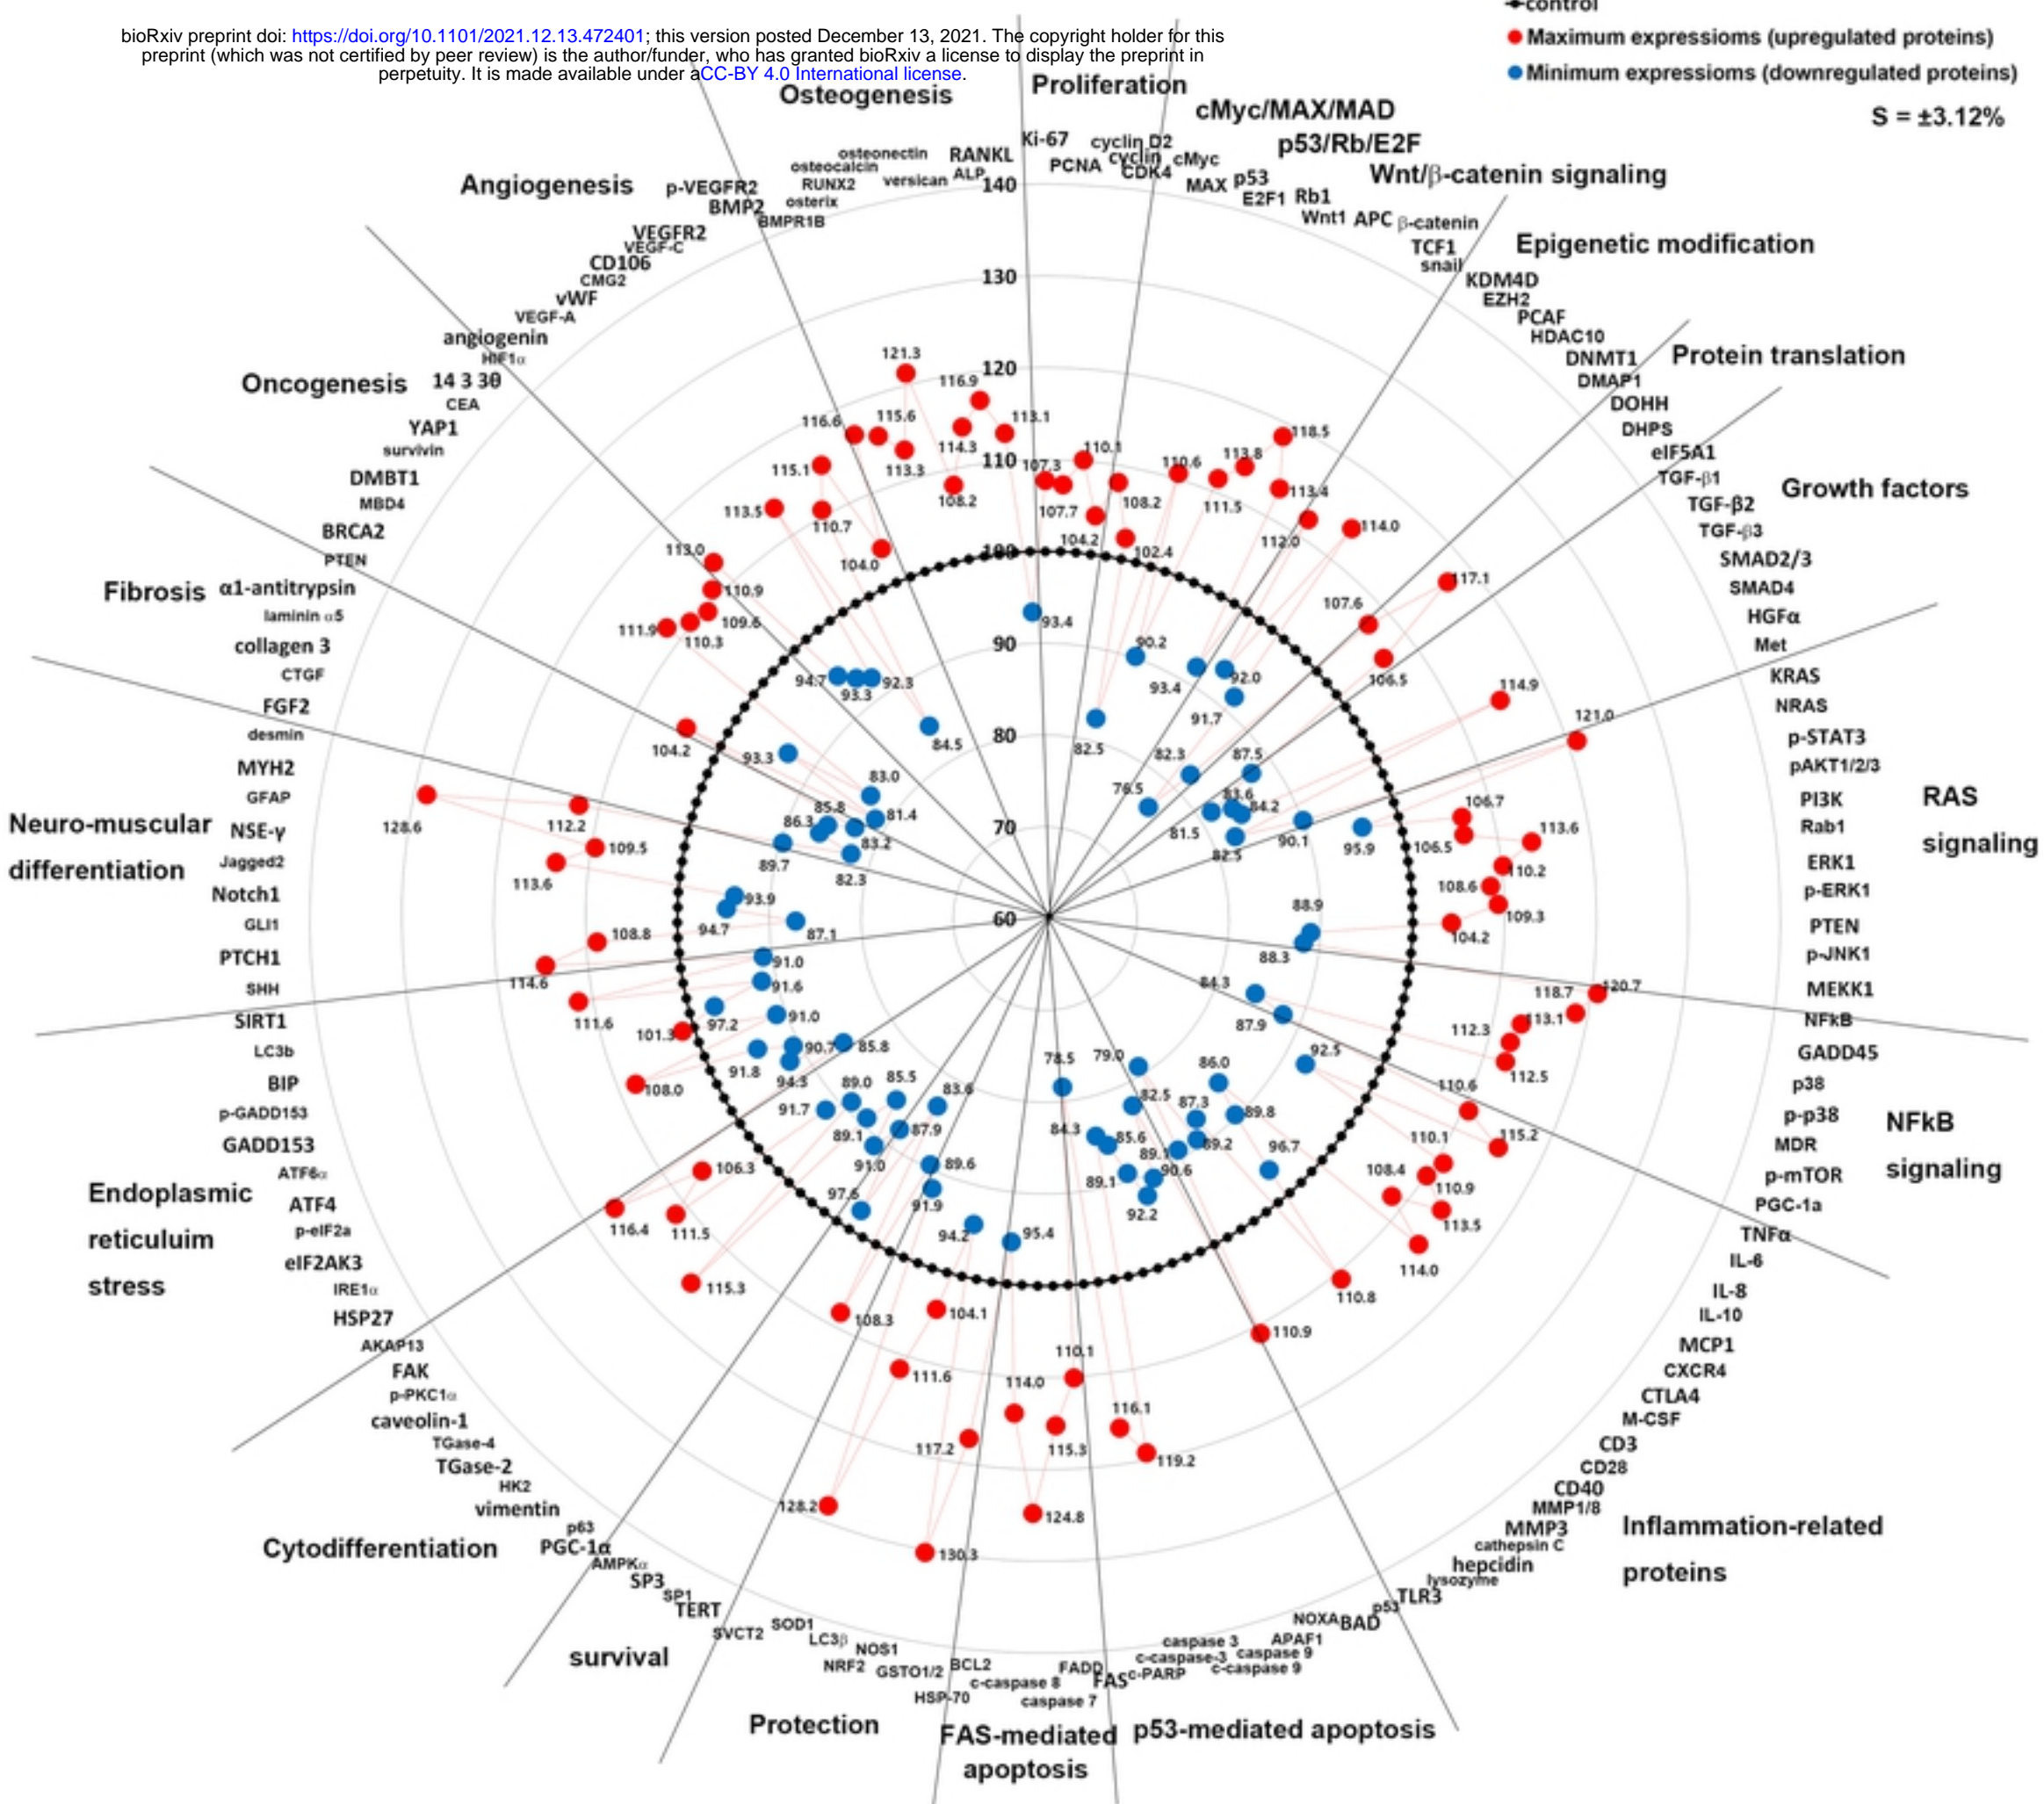

Figure 16



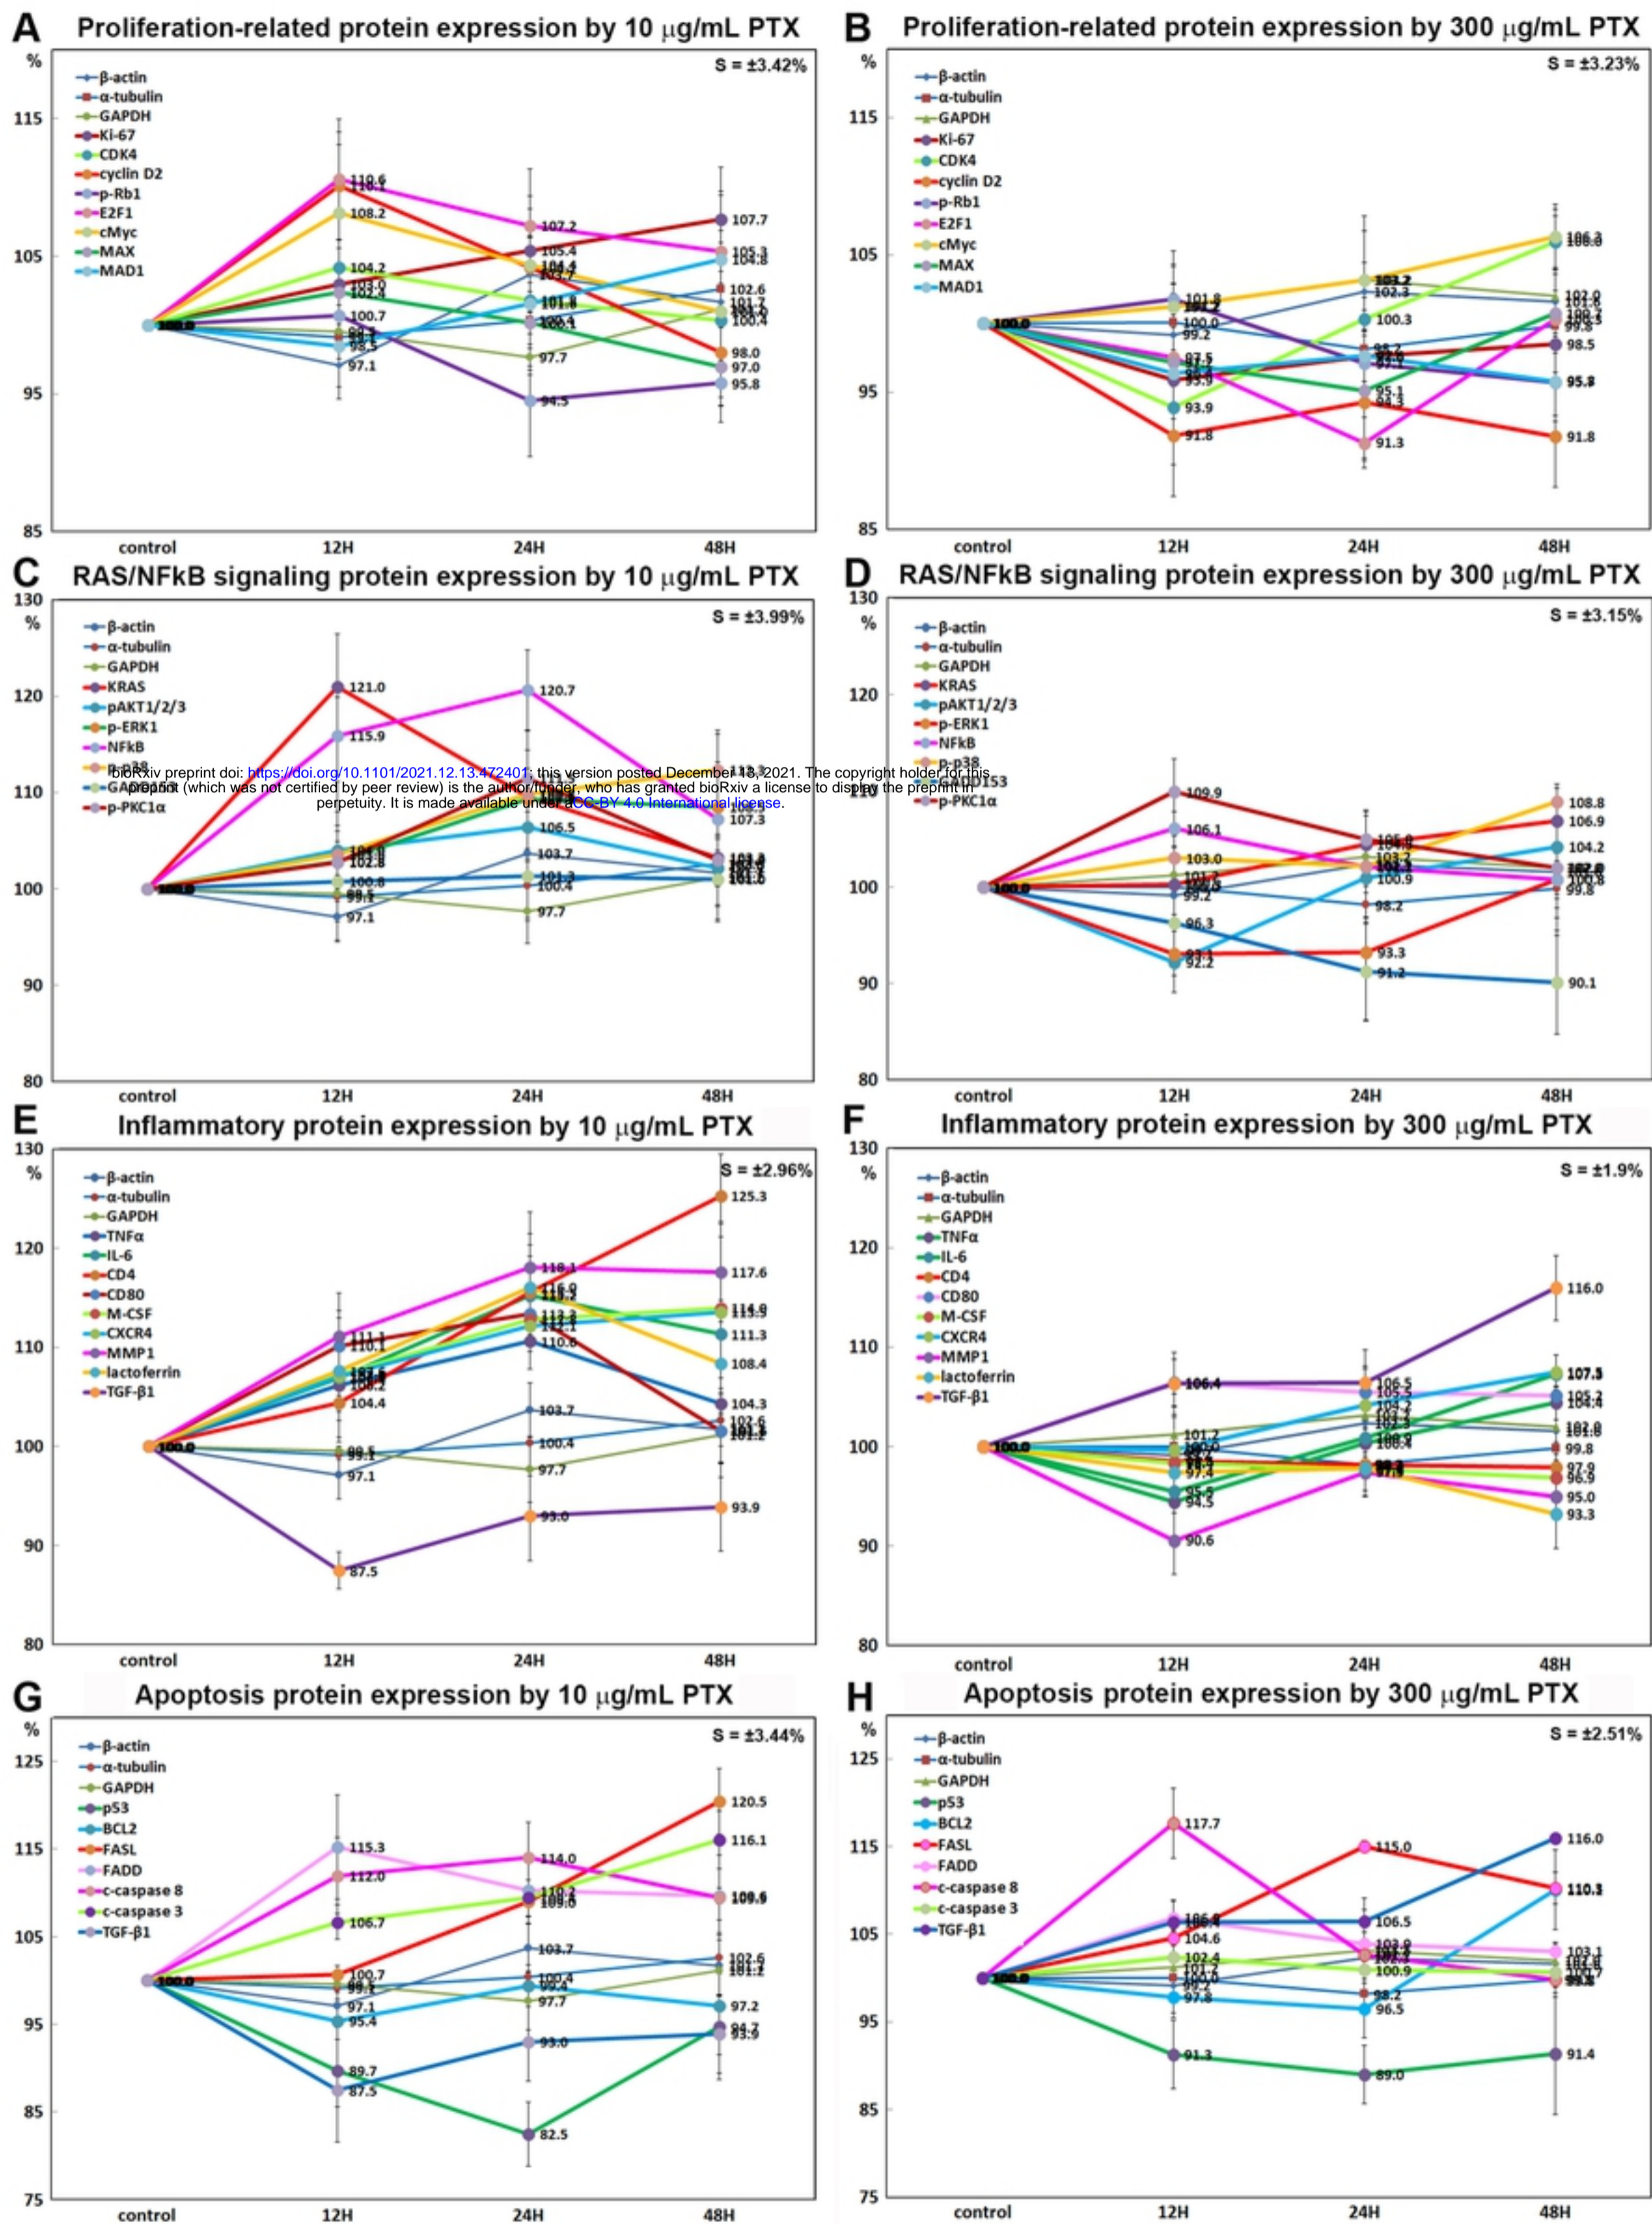

Figure 17



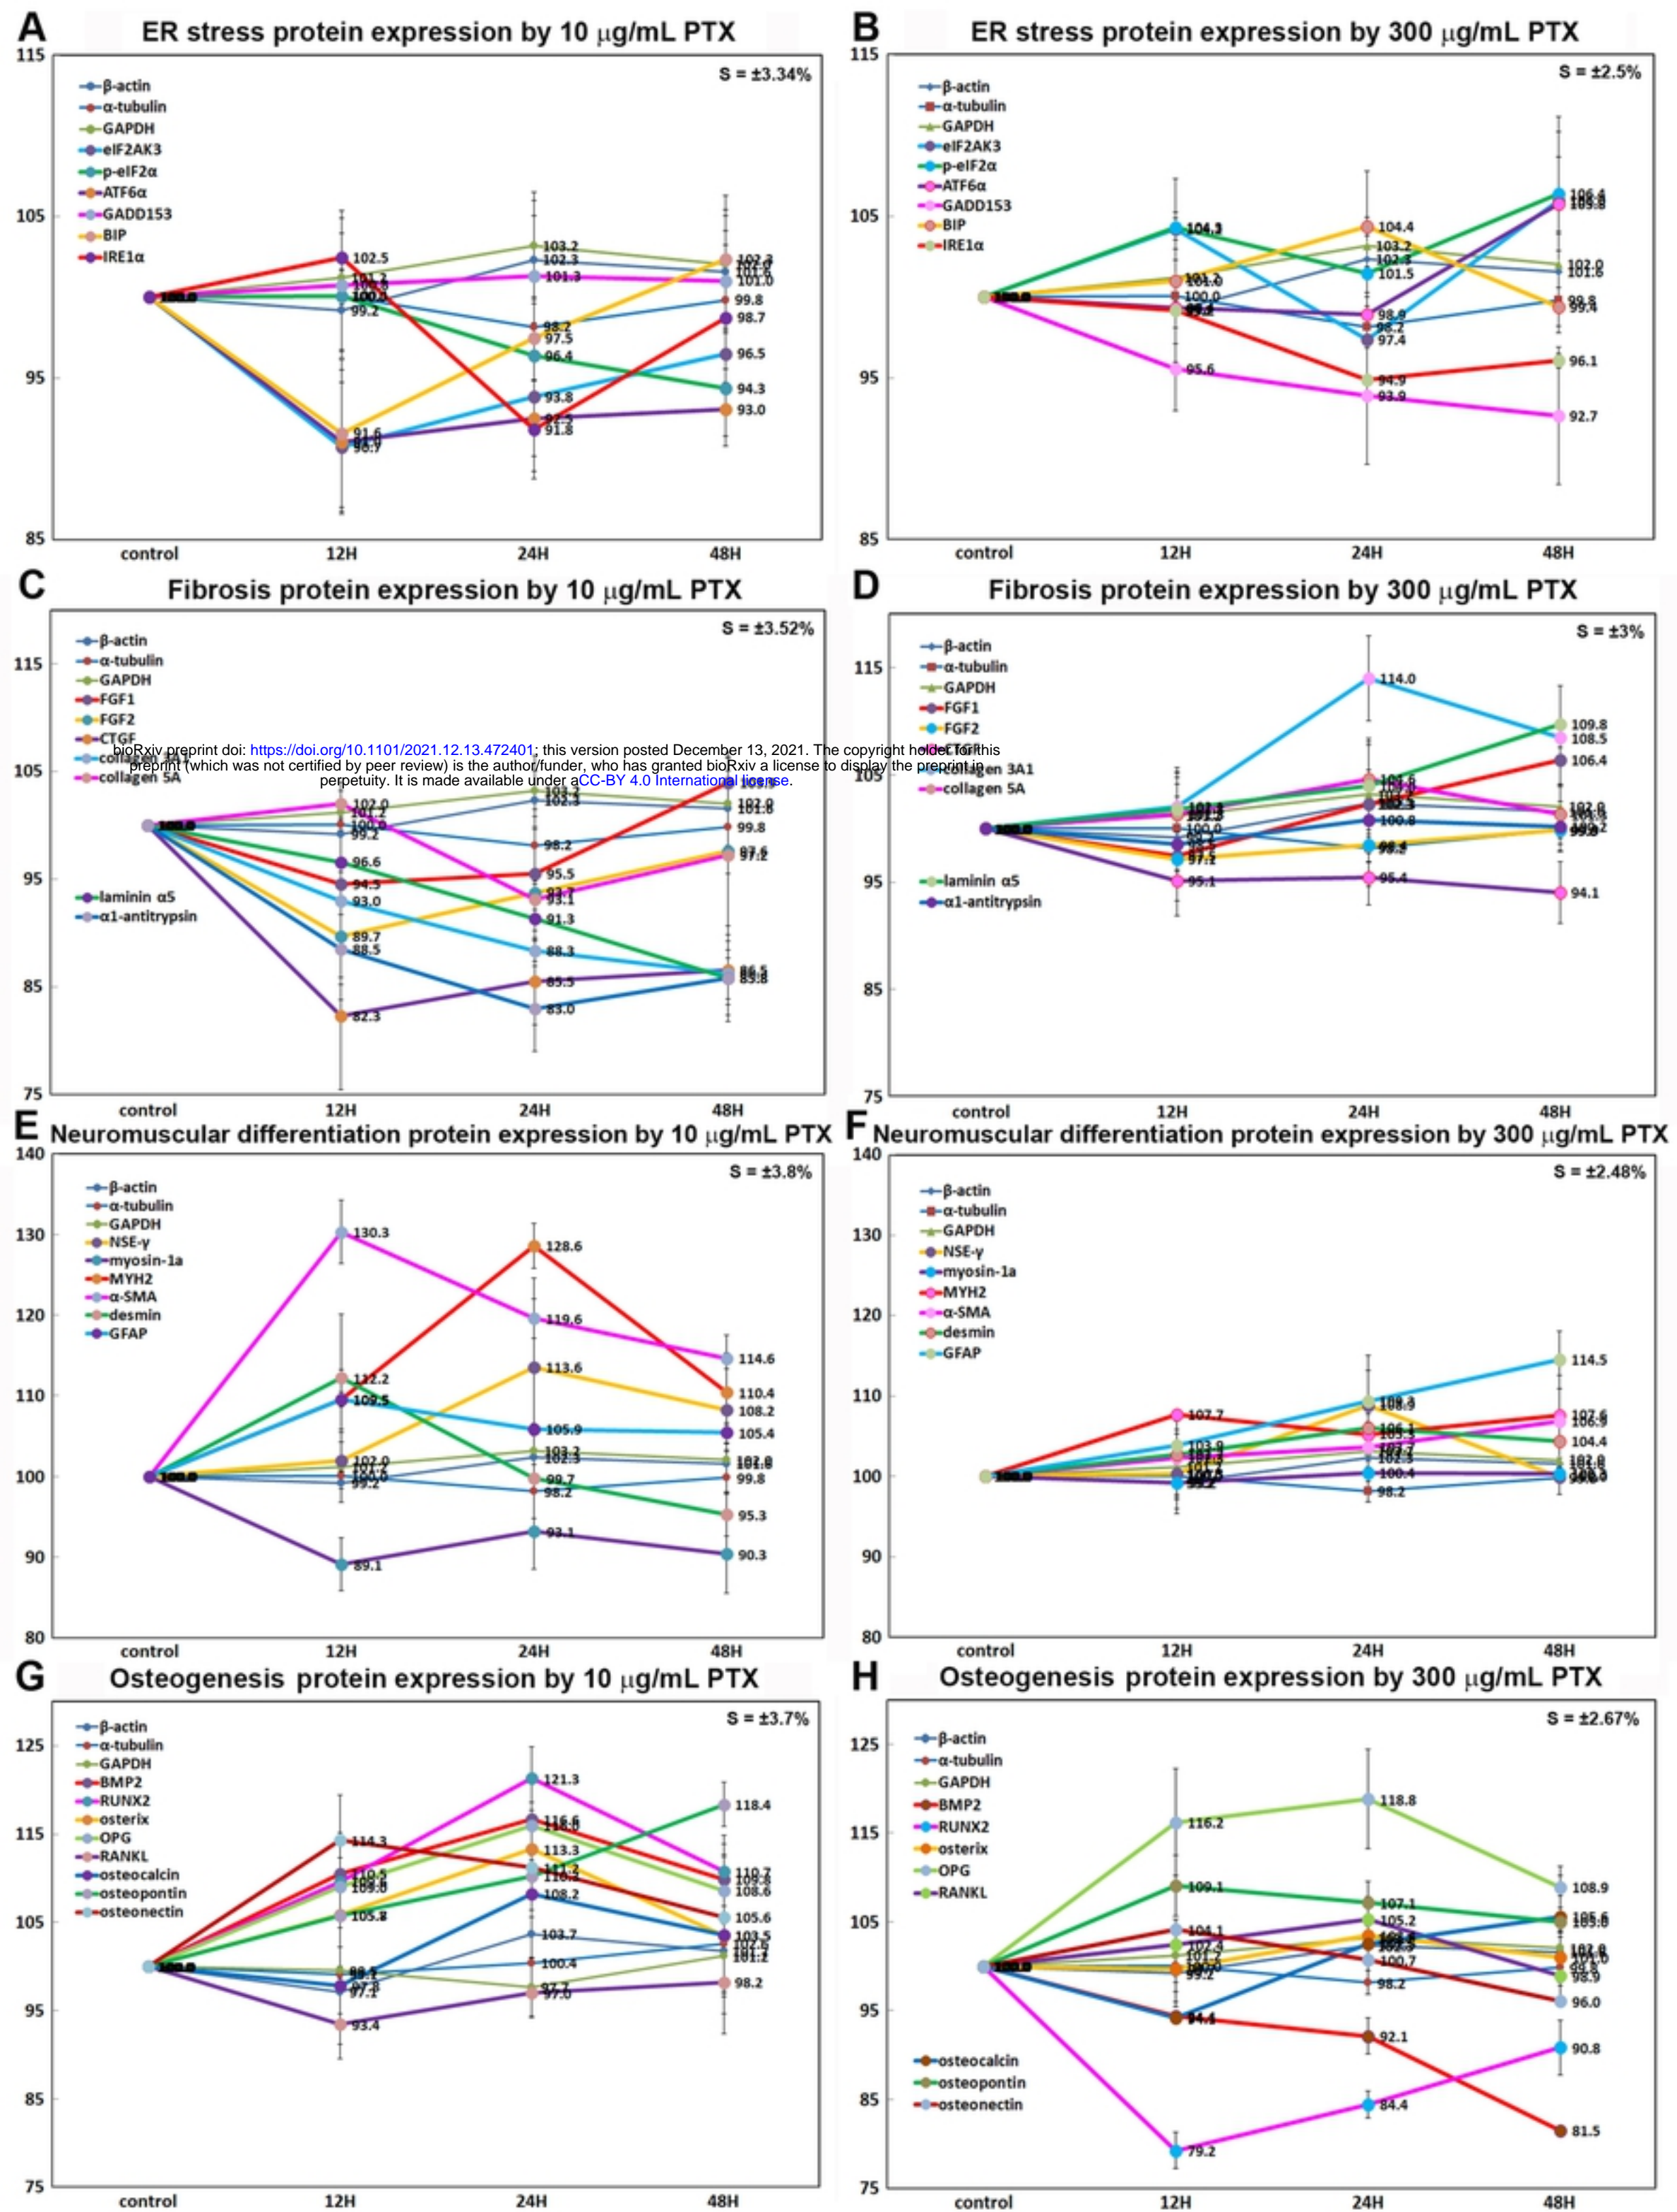

Figure 18



# 10 μg/mL PTX-induced protein signaling pathways in RAW 264.7 cells

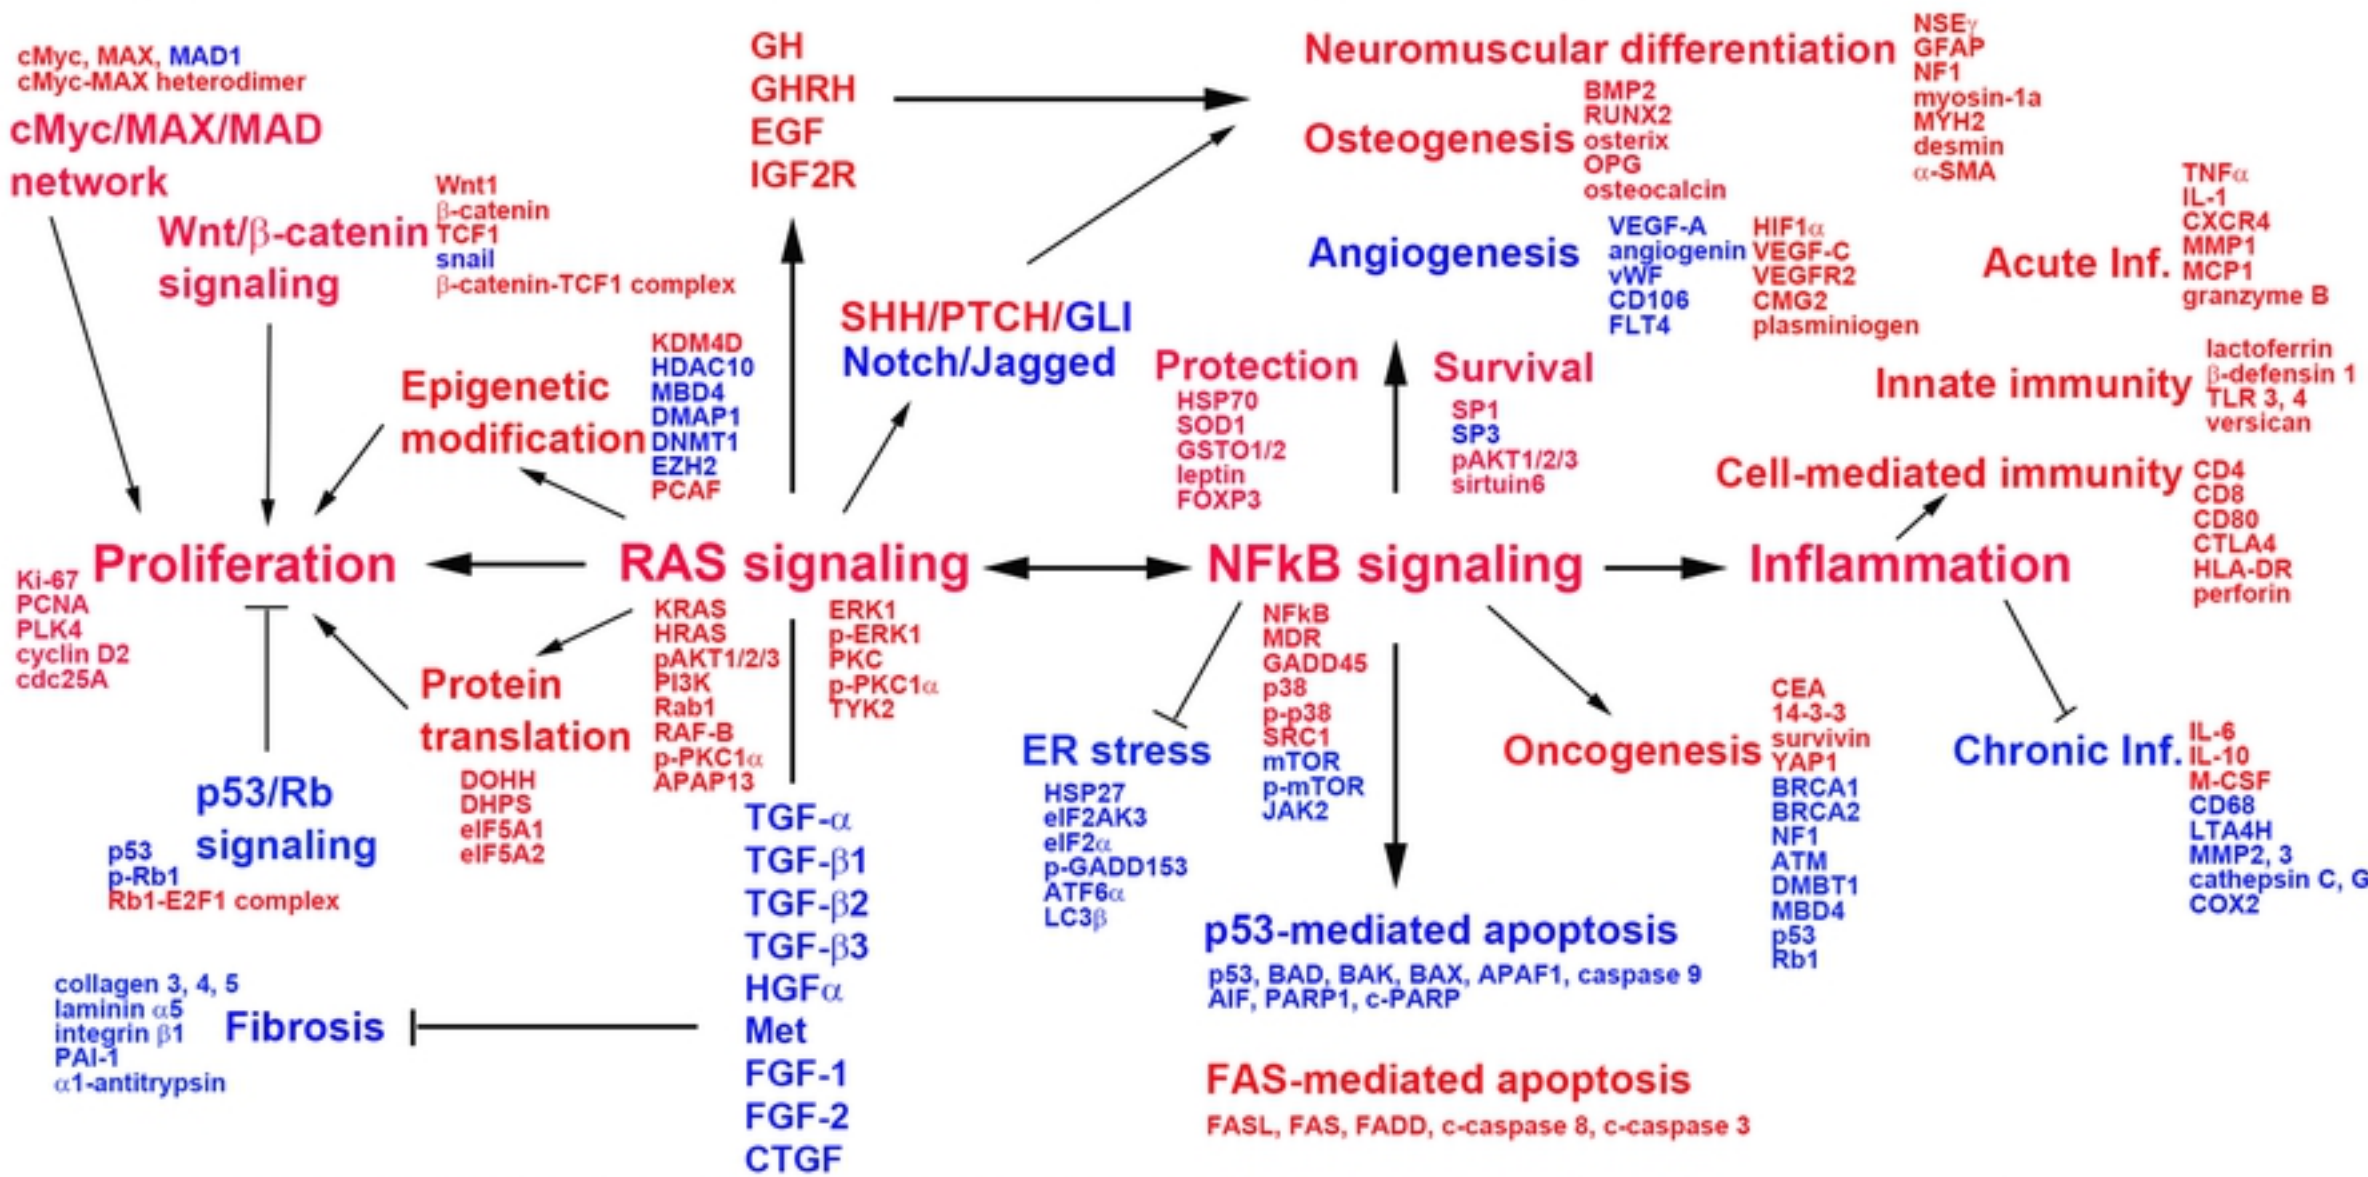

Upregulated (red letter) and downregulated (blue letter) signaling and proteins

Figure 19
